# Supplementary material
Source: publisher figshare collection journal article supplement (https://wiley.figshare.com/ndownloader/files/17599196)
Supplement: Supplementary file 1 [file 17599196]

PHOTO_FILE_NAME	PHOTO_TIMESTAMP	LATITUDE_WGS84	LONGITUDE_WGS84	ALTITUDE	SURVEY_TYPE	COUNT_ADULT	COUNT_PUP	KELP_PRESENT	LAND_PRESENT	IMAGE_QUALITY	COUNTED_BY	COUNTED_DATE	PROTOCOL_ID	QUALITY_FLAG
SO_C_20180718_O_0062.JPG	2018-07-18 13:33:58	58.38470278	-135.90014167	204	Optimal	0	0	0	1	Good	LFT	2018-09-12	SO-2017.1	0
SO_C_20180718_O_0063.JPG	2018-07-18 13:33:59	58.38469722	-135.90095000	205	Optimal	0	0	0	1	Good	LFT	2018-09-12	SO-2017.1	0
SO_C_20180718_O_0064.JPG	2018-07-18 13:34:00	58.38469444	-135.90176111	205	Optimal	0	0	0	1	Good	LFT	2018-09-12	SO-2017.1	0
SO_C_20180718_O_0065.JPG	2018-07-18 13:34:01	58.38469167	-135.90256944	205	Optimal	0	0	0	1	Good	LFT	2018-09-12	SO-2017.1	0
SO_C_20180718_O_0066.JPG	2018-07-18 13:34:02	58.38469167	-135.90337778	206	Optimal	0	0	0	1	Good	LFT	2018-09-12	SO-2017.1	0
SO_C_20180718_O_0067.JPG	2018-07-18 13:34:03	58.38469444	-135.90418333	206	Optimal	0	0	0	1	Good	LFT	2018-09-12	SO-2017.1	0
SO_C_20180718_O_0068.JPG	2018-07-18 13:34:04	58.38469444	-135.90499444	206	Optimal	0	0	0	1	Good	LFT	2018-09-12	SO-2017.1	0
SO_C_20180718_O_0069.JPG	2018-07-18 13:34:05	58.38469167	-135.90580278	207	Optimal	0	0	0	1	Good	LFT	2018-09-12	SO-2017.1	0
SO_C_20180718_O_0070.JPG	2018-07-18 13:34:06	58.38468611	-135.90661667	207	Optimal	0	0	0	1	Good	LFT	2018-09-12	SO-2017.1	0
SO_C_20180718_O_0071.JPG	2018-07-18 13:34:07	58.38467778	-135.90743333	207	Optimal	0	0	0	1	Good	LFT	2018-09-12	SO-2017.1	0
SO_C_20180718_O_0072.JPG	2018-07-18 13:34:08	58.38466667	-135.90825278	207	Optimal	0	0	0	1	Good	LFT	2018-09-12	SO-2017.1	0
SO_C_20180718_O_0073.JPG	2018-07-18 13:34:09	58.38466389	-135.90907500	207	Optimal	0	0	0	1	Good	LFT	2018-09-12	SO-2017.1	0
SO_C_20180718_O_0074.JPG	2018-07-18 13:34:10	58.38465833	-135.90989722	207	Optimal	0	0	0	1	Good	LFT	2018-09-12	SO-2017.1	0
SO_C_20180718_O_0075.JPG	2018-07-18 13:34:11	58.38465278	-135.91072222	207	Optimal	0	0	0	1	Good	LFT	2018-09-12	SO-2017.1	0
SO_C_20180718_O_0076.JPG	2018-07-18 13:34:12	58.38464444	-135.91155000	206	Optimal	0	0	0	1	Good	LFT	2018-09-12	SO-2017.1	0
SO_C_20180718_O_0077.JPG	2018-07-18 13:34:13	58.38463611	-135.91237778	206	Optimal	0	0	0	1	Good	LFT	2018-09-12	SO-2017.1	0
SO_C_20180718_O_0078.JPG	2018-07-18 13:34:14	58.38462778	-135.91320556	205	Optimal	0	0	0	1	Good	LFT	2018-09-12	SO-2017.1	0
SO_C_20180718_O_0079.JPG	2018-07-18 13:34:15	58.38461667	-135.91402778	204	Optimal	0	0	0	1	Good	LFT	2018-09-12	SO-2017.1	0
SO_C_20180718_O_0080.JPG	2018-07-18 13:34:16	58.38460833	-135.91484444	203	Optimal	0	0	0	1	Good	LFT	2018-09-12	SO-2017.1	0
SO_C_20180718_O_0081.JPG	2018-07-18 13:34:17	58.38459722	-135.91566111	203	Optimal	0	0	0	1	Good	LFT	2018-09-12	SO-2017.1	0
SO_C_20180718_O_0082.JPG	2018-07-18 13:34:18	58.38459167	-135.91647222	202	Optimal	0	0	0	1	Good	LFT	2018-09-12	SO-2017.1	0
SO_C_20180718_O_0083.JPG	2018-07-18 13:34:19	58.38458611	-135.91727778	202	Optimal	0	0	0	1	Good	LFT	2018-09-12	SO-2017.1	0
SO_C_20180718_O_0084.JPG	2018-07-18 13:34:20	58.38458611	-135.91808333	202	Optimal	0	0	0	1	Good	LFT	2018-09-12	SO-2017.1	0
SO_C_20180718_O_0085.JPG	2018-07-18 13:34:21	58.38459167	-135.91888889	202	Optimal	0	0	0	1	Good	LFT	2018-09-12	SO-2017.1	0
SO_C_20180718_O_0086.JPG	2018-07-18 13:34:22	58.38460000	-135.91969444	203	Optimal	0	0	0	1	Good	LFT	2018-09-12	SO-2017.1	0
SO_C_20180718_O_0087.JPG	2018-07-18 13:34:23	58.38461111	-135.92050556	203	Optimal	0	0	0	1	Good	LFT	2018-09-12	SO-2017.1	0
SO_C_20180718_O_0088.JPG	2018-07-18 13:34:24	58.38462222	-135.92131667	204	Optimal	0	0	0	1	Good	LFT	2018-09-12	SO-2017.1	0
SO_C_20180718_O_0089.JPG	2018-07-18 13:34:25	58.38463889	-135.92213056	204	Optimal	0	0	0	1	Good	LFT	2018-09-12	SO-2017.1	0
SO_C_20180718_O_0090.JPG	2018-07-18 13:34:26	58.38465000	-135.92294444	205	Optimal	0	0	0	1	Good	LFT	2018-09-12	SO-2017.1	0
SO_C_20180718_O_0091.JPG	2018-07-18 13:34:27	58.38465556	-135.92376111	205	Optimal	0	0	0	1	Good	LFT	2018-09-12	SO-2017.1	0
SO_C_20180718_O_0092.JPG	2018-07-18 13:34:28	58.38465833	-135.92457500	205	Optimal	0	0	0	1	Good	LFT	2018-09-12	SO-2017.1	0
SO_C_20180718_O_0093.JPG	2018-07-18 13:34:29	58.38466389	-135.92538889	205	Optimal	0	0	1	1	Good	LFT	2018-09-12	SO-2017.1	0
SO_C_20180718_O_0094.JPG	2018-07-18 13:34:30	58.38466667	-135.92620278	205	Optimal	0	0	1	0	Good	LFT	2018-09-12	SO-2017.1	0
SO_C_20180718_O_0095.JPG	2018-07-18 13:34:31	58.38466389	-135.92701944	205	Optimal	0	0	0	0	Good	LFT	2018-09-12	SO-2017.1	0
SO_C_20180718_O_0096.JPG	2018-07-18 13:34:32	58.38465833	-135.92783889	205	Optimal	0	0	0	0	Good	LFT	2018-09-12	SO-2017.1	0
SO_C_20180718_O_0097.JPG	2018-07-18 13:34:33	58.38465278	-135.92865833	205	Optimal	0	0	0	0	Good	LFT	2018-09-12	SO-2017.1	0
SO_C_20180718_O_0098.JPG	2018-07-18 13:34:34	58.38464444	-135.92947778	205	Optimal	0	0	0	0	Good	LFT	2018-09-12	SO-2017.1	0
SO_C_20180718_O_0099.JPG	2018-07-18 13:34:35	58.38463611	-135.93029722	205	Optimal	0	0	0	0	Good	LFT	2018-09-12	SO-2017.1	0
SO_C_20180718_O_0100.JPG	2018-07-18 13:34:36	58.38462500	-135.93111667	205	Optimal	0	0	0	0	Good	LFT	2018-09-12	SO-2017.1	0
SO_C_20180718_O_0101.JPG	2018-07-18 13:34:37	58.38461389	-135.93193611	205	Optimal	0	0	0	0	Good	LFT	2018-09-12	SO-2017.1	0
SO_C_20180718_O_0102.JPG	2018-07-18 13:34:38	58.38460000	-135.93275556	205	Optimal	0	0	0	0	Good	LFT	2018-09-12	SO-2017.1	0
SO_C_20180718_O_0103.JPG	2018-07-18 13:34:39	58.38458611	-135.93358056	206	Optimal	0	0	0	0	Good	LFT	2018-09-12	SO-2017.1	0
SO_C_20180718_O_0104.JPG	2018-07-18 13:34:40	58.38457222	-135.93440556	206	Optimal	0	0	0	0	Good	LFT	2018-09-12	SO-2017.1	0
SO_C_20180718_O_0105.JPG	2018-07-18 13:34:41	58.38456389	-135.93522778	206	Optimal	0	0	0	0	Good	LFT	2018-09-12	SO-2017.1	0
SO_C_20180718_O_0106.JPG	2018-07-18 13:34:42	58.38455278	-135.93605278	206	Optimal	0	0	0	0	Good	LFT	2018-09-12	SO-2017.1	0
SO_C_20180718_O_0107.JPG	2018-07-18 13:34:43	58.38454444	-135.93687500	206	Optimal	0	0	0	0	Good	LFT	2018-09-12	SO-2017.1	0
SO_C_20180718_O_0108.JPG	2018-07-18 13:34:44	58.38453611	-135.93770000	206	Optimal	0	0	0	0	Good	LFT	2018-09-12	SO-2017.1	0
SO_C_20180718_O_0109.JPG	2018-07-18 13:34:45	58.38452778	-135.93852222	206	Optimal	0	0	0	0	Good	LFT	2018-09-12	SO-2017.1	0
SO_C_20180718_O_0110.JPG	2018-07-18 13:34:46	58.38452222	-135.93934444	206	Optimal	0	0	1	0	Good	LFT	2018-09-12	SO-2017.1	0
SO_C_20180718_O_0111.JPG	2018-07-18 13:34:47	58.38451667	-135.94016667	206	Optimal	0	0	0	0	Good	LFT	2018-09-12	SO-2017.1	0
SO_C_20180718_O_0112.JPG	2018-07-18 13:34:48	58.38451111	-135.94098611	206	Optimal	0	0	0	0	Good	LFT	2018-09-12	SO-2017.1	0
SO_C_20180718_O_0113.JPG	2018-07-18 13:34:49	58.38450833	-135.94180556	206	Optimal	0	0	0	0	Good	LFT	2018-09-12	SO-2017.1	0
SO_C_20180718_O_0114.JPG	2018-07-18 13:34:50	58.38450833	-135.94261944	207	Optimal	0	0	0	0	Good	LFT	2018-09-12	SO-2017.1	0
SO_C_20180718_O_0115.JPG	2018-07-18 13:34:51	58.38450833	-135.94343333	207	Optimal	0	0	0	0	Good	LFT	2018-09-12	SO-2017.1	0
SO_C_20180718_O_0116.JPG	2018-07-18 13:34:52	58.38451389	-135.94424167	207	Optimal	0	0	0	0	Good	LFT	2018-09-12	SO-2017.1	0
SO_C_20180718_O_0117.JPG	2018-07-18 13:34:53	58.38452500	-135.94505278	208	Optimal	0	0	0	0	Good	LFT	2018-09-12	SO-2017.1	0
SO_C_20180718_O_0118.JPG	2018-07-18 13:34:54	58.38453611	-135.94586111	209	Optimal	0	0	0	0	Good	LFT	2018-09-12	SO-2017.1	0
SO_C_20180718_O_0119.JPG	2018-07-18 13:34:55	58.38454444	-135.94667222	209	Optimal	0	0	0	0	Good	LFT	2018-09-12	SO-2017.1	0
SO_C_20180718_O_0120.JPG	2018-07-18 13:34:56	58.38455556	-135.94748611	210	Optimal	0	0	0	0	Good	LFT	2018-09-12	SO-2017.1	0
SO_C_20180718_O_0121.JPG	2018-07-18 13:34:57	58.38456389	-135.94830278	210	Optimal	0	0	0	0	Good	LFT	2018-09-12	SO-2017.1	0
SO_C_20180718_O_0122.JPG	2018-07-18 13:34:58	58.38457222	-135.94911944	211	Optimal	0	0	0	0	Good	LFT	2018-09-12	SO-2017.1	0
SO_C_20180718_O_0123.JPG	2018-07-18 13:34:59	58.38457778	-135.94993889	211	Optimal	0	0	0	0	Good	LFT	2018-09-12	SO-2017.1	0
SO_C_20180718_O_0124.JPG	2018-07-18 13:35:00	58.38458333	-135.95075556	211	Optimal	0	0	0	0	Good	LFT	2018-09-12	SO-2017.1	0
SO_C_20180718_O_0125.JPG	2018-07-18 13:35:01	58.38458611	-135.95157778	211	Optimal	0	0	0	0	Good	LFT	2018-09-12	SO-2017.1	0
SO_C_20180718_O_0126.JPG	2018-07-18 13:35:02	58.38458611	-135.95239722	211	Optimal	0	0	0	0	Good	LFT	2018-09-12	SO-2017.1	0
SO_C_20180718_O_0127.JPG	2018-07-18 13:35:03	58.38458333	-135.95321667	210	Optimal	0	0	0	0	Good	LFT	2018-09-12	SO-2017.1	0
SO_C_20180718_O_0128.JPG	2018-07-18 13:35:04	58.38457778	-135.95403611	210	Optimal	1	0	0	0	Good	LFT	2018-09-12	SO-2017.1	0
SO_C_20180718_O_0129.JPG	2018-07-18 13:35:05	58.38457500	-135.95485278	210	Optimal	0	0	0	0	Good	LFT	2018-09-12	SO-2017.1	0
SO_C_20180718_O_0130.JPG	2018-07-18 13:35:06	58.38456667	-135.95566944	210	Optimal	0	0	0	0	Good	LFT	2018-09-12	SO-2017.1	0
SO_C_20180718_O_0131.JPG	2018-07-18 13:35:07	58.38456111	-135.95648611	210	Optimal	0	0	0	0	Good	LFT	2018-09-12	SO-2017.1	0
SO_C_20180718_O_0132.JPG	2018-07-18 13:35:08	58.38455000	-135.95730278	210	Optimal	0	0	0	0	Good	LFT	2018-09-12	SO-2017.1	0
SO_C_20180718_O_0133.JPG	2018-07-18 13:35:09	58.38454167	-135.95811667	210	Optimal	0	0	0	0	Good	LFT	2018-09-12	SO-2017.1	0
SO_C_20180718_O_0134.JPG	2018-07-18 13:35:10	58.38453056	-135.95893056	210	Optimal	0	0	0	0	Good	LFT	2018-09-12	SO-2017.1	0
SO_C_20180718_O_0135.JPG	2018-07-18 13:35:11	58.38452222	-135.95974167	211	Optimal	0	0	0	0	Good	LFT	2018-09-12	SO-2017.1	0
SO_C_20180718_O_0136.JPG	2018-07-18 13:35:12	58.38451389	-135.96055556	211	Optimal	0	0	0	0	Good	LFT	2018-09-12	SO-2017.1	0
SO_C_20180718_O_0137.JPG	2018-07-18 13:35:13	58.38451111	-135.96137500	212	Optimal	0	0	0	0	Good	LFT	2018-09-12	SO-2017.1	0
SO_C_20180718_O_0138.JPG	2018-07-18 13:35:14	58.38451111	-135.96219444	212	Optimal	0	0	0	0	Good	LFT	2018-09-12	SO-2017.1	0
SO_C_20180718_O_0139.JPG	2018-07-18 13:35:15	58.38451389	-135.96301667	212	Optimal	0	0	0	0	Good	LFT	2018-09-12	SO-2017.1	0
SO_C_20180718_O_0140.JPG	2018-07-18 13:35:16	58.38451667	-135.96384167	212	Optimal	0	0	0	0	Good	LFT	2018-09-12	SO-2017.1	0
SO_C_20180718_O_0141.JPG	2018-07-18 13:35:17	58.38451944	-135.96466944	212	Optimal	0	0	0	0	Good	LFT	2018-09-12	SO-2017.1	0
SO_C_20180718_O_0142.JPG	2018-07-18 13:35:18	58.38451944	-135.96550000	212	Optimal	0	0	0	0	Good	LFT	2018-09-12	SO-2017.1	0
SO_C_20180718_O_0143.JPG	2018-07-18 13:35:19	58.38452222	-135.96633056	212	Optimal	0	0	0	0	Good	LFT	2018-09-12	SO-2017.1	0
SO_C_20180718_O_0144.JPG	2018-07-18 13:35:20	58.38451944	-135.96716389	212	Optimal	0	0	0	0	Good	LFT	2018-09-12	SO-2017.1	0
SO_C_20180718_O_0145.JPG	2018-07-18 13:35:21	58.38451389	-135.96799444	211	Optimal	0	0	0	0	Good	LFT	2018-09-12	SO-2017.1	0
SO_C_20180718_O_0146.JPG	2018-07-18 13:35:22	58.38450833	-135.96882500	210	Optimal	0	0	0	0	Good	LFT	2018-09-12	SO-2017.1	0
SO_C_20180718_O_0147.JPG	2018-07-18 13:35:23	58.38450278	-135.96965556	210	Optimal	0	0	0	0	Good	LFT	2018-09-12	SO-2017.1	0
SO_C_20180718_O_0148.JPG	2018-07-18 13:35:24	58.38449722	-135.97048056	210	Optimal	0	0	0	0	Good	LFT	2018-09-12	SO-2017.1	0
SO_C_20180718_O_0149.JPG	2018-07-18 13:35:25	58.38449167	-135.97130278	210	Optimal	0	0	0	0	Good	LFT	2018-09-12	SO-2017.1	0
SO_C_20180718_O_0150.JPG	2018-07-18 13:35:26	58.38448333	-135.97212222	210	Optimal	0	0	0	0	Good	LFT	2018-09-12	SO-2017.1	0
SO_C_20180718_O_0151.JPG	2018-07-18 13:35:27	58.38447500	-135.97294167	210	Optimal	0	0	0	0	Good	LFT	2018-09-12	SO-2017.1	0
SO_C_20180718_O_0152.JPG	2018-07-18 13:35:28	58.38446944	-135.97375833	210	Optimal	0	0	0	0	Good	LFT	2018-09-12	SO-2017.1	0
SO_C_20180718_O_0153.JPG	2018-07-18 13:35:29	58.38446389	-135.97457500	210	Optimal	0	0	0	0	Good	LFT	2018-09-12	SO-2017.1	0
SO_C_20180718_O_0154.JPG	2018-07-18 13:35:30	58.38446111	-135.97539444	211	Optimal	0	0	0	0	Good	LFT	2018-09-12	SO-2017.1	0
SO_C_20180718_O_0155.JPG	2018-07-18 13:35:31	58.38445833	-135.97621389	211	Optimal	0	0	0	0	Good	LFT	2018-09-12	SO-2017.1	0
SO_C_20180718_O_0156.JPG	2018-07-18 13:35:32	58.38446111	-135.97703611	212	Optimal	0	0	0	0	Good	LFT	2018-09-12	SO-2017.1	0
SO_C_20180718_O_0157.JPG	2018-07-18 13:35:33	58.38446111	-135.97786111	212	Optimal	0	0	0	0	Good	LFT	2018-09-12	SO-2017.1	0
SO_C_20180718_O_0158.JPG	2018-07-18 13:35:34	58.38446667	-135.97868889	212	Optimal	0	0	0	0	Good	LFT	2018-09-12	SO-2017.1	0
SO_C_20180718_O_0159.JPG	2018-07-18 13:35:35	58.38446944	-135.97951944	212	Optimal	0	0	0	0	Good	LFT	2018-09-12	SO-2017.1	0
SO_C_20180718_O_0160.JPG	2018-07-18 13:35:36	58.38447222	-135.98035556	212	Optimal	0	0	0	0	Good	LFT	2018-09-12	SO-2017.1	0
SO_C_20180718_O_0161.JPG	2018-07-18 13:35:37	58.38447778	-135.98118889	211	Optimal	0	0	0	0	Good	LFT	2018-09-12	SO-2017.1	0
SO_C_20180718_O_0162.JPG	2018-07-18 13:35:38	58.38448056	-135.98202500	211	Optimal	1	0	0	0	Good	LFT	2018-09-12	SO-2017.1	0
SO_C_20180718_O_0163.JPG	2018-07-18 13:35:39	58.38448056	-135.98286111	210	Optimal	0	0	0	0	Good	LFT	2018-09-12	SO-2017.1	0
SO_C_20180718_O_0164.JPG	2018-07-18 13:35:40	58.38448056	-135.98369167	210	Optimal	0	0	0	0	Good	LFT	2018-09-12	SO-2017.1	0
SO_C_20180718_O_0165.JPG	2018-07-18 13:35:41	58.38448333	-135.98451944	209	Optimal	0	0	0	0	Good	LFT	2018-09-12	SO-2017.1	0
SO_C_20180718_O_0166.JPG	2018-07-18 13:35:42	58.38448333	-135.98534722	209	Optimal	0	0	0	0	Good	LFT	2018-09-12	SO-2017.1	0
SO_C_20180718_O_0167.JPG	2018-07-18 13:35:43	58.38448333	-135.98616944	209	Optimal	0	0	1	0	Good	LFT	2018-09-12	SO-2017.1	0
SO_C_20180718_O_0168.JPG	2018-07-18 13:35:44	58.38448056	-135.98699444	209	Optimal	0	0	0	0	Good	LFT	2018-09-12	SO-2017.1	0
SO_C_20180718_O_0169.JPG	2018-07-18 13:35:45	58.38447778	-135.98781667	209	Optimal	0	0	0	0	Good	LFT	2018-09-12	SO-2017.1	0
SO_C_20180718_O_0170.JPG	2018-07-18 13:35:46	58.38447778	-135.98863889	209	Optimal	0	0	0	0	Good	LFT	2018-09-12	SO-2017.1	0
SO_C_20180718_O_0171.JPG	2018-07-18 13:35:47	58.38447778	-135.98946111	209	Optimal	0	0	0	0	Good	LFT	2018-09-12	SO-2017.1	0
SO_C_20180718_O_0172.JPG	2018-07-18 13:35:48	58.38447778	-135.99028056	210	Optimal	0	0	0	0	Good	LFT	2018-09-12	SO-2017.1	0
SO_C_20180718_O_0173.JPG	2018-07-18 13:35:49	58.38448333	-135.99110556	210	Optimal	0	0	0	0	Good	LFT	2018-09-12	SO-2017.1	0
SO_C_20180718_O_0174.JPG	2018-07-18 13:35:50	58.38448889	-135.99193333	210	Optimal	0	0	0	0	Good	LFT	2018-09-12	SO-2017.1	0
SO_C_20180718_O_0175.JPG	2018-07-18 13:35:51	58.38448889	-135.99275833	211	Optimal	0	0	0	0	Good	LFT	2018-09-12	SO-2017.1	0
SO_C_20180718_O_0176.JPG	2018-07-18 13:35:52	58.38448611	-135.99358056	211	Optimal	0	0	0	0	Good	LFT	2018-09-12	SO-2017.1	0
SO_C_20180718_O_0177.JPG	2018-07-18 13:35:53	58.38447778	-135.99440556	211	Optimal	0	0	0	0	Good	LFT	2018-09-12	SO-2017.1	0
SO_C_20180718_O_0178.JPG	2018-07-18 13:35:54	58.38446944	-135.99523333	211	Optimal	0	0	0	0	Good	LFT	2018-09-12	SO-2017.1	0
SO_C_20180718_O_0179.JPG	2018-07-18 13:35:55	58.38445833	-135.99606111	211	Optimal	0	0	0	0	Good	LFT	2018-09-12	SO-2017.1	0
SO_C_20180718_O_0180.JPG	2018-07-18 13:35:56	58.38444444	-135.99689167	211	Optimal	0	0	0	0	Good	LFT	2018-09-12	SO-2017.1	0
SO_C_20180718_O_0181.JPG	2018-07-18 13:35:57	58.38442778	-135.99772222	211	Optimal	0	0	0	0	Good	LFT	2018-09-12	SO-2017.1	0
SO_C_20180718_O_0182.JPG	2018-07-18 13:35:58	58.38441667	-135.99855556	211	Optimal	0	0	0	0	Good	LFT	2018-09-12	SO-2017.1	0
SO_C_20180718_O_0183.JPG	2018-07-18 13:35:59	58.38440000	-135.99938889	210	Optimal	0	0	0	0	Good	LFT	2018-09-12	SO-2017.1	0
SO_C_20180718_O_0184.JPG	2018-07-18 13:36:00	58.38438056	-136.00022500	210	Optimal	0	0	1	1	Good	LFT	2018-09-12	SO-2017.1	0
SO_C_20180718_O_0185.JPG	2018-07-18 13:36:01	58.38436667	-136.00106111	210	Optimal	0	0	0	0	Good	LFT	2018-09-12	SO-2017.1	0
SO_C_20180718_O_0186.JPG	2018-07-18 13:36:02	58.38435278	-136.00189722	210	Optimal	0	0	0	0	Good	LFT	2018-09-12	SO-2017.1	0
SO_C_20180718_O_0187.JPG	2018-07-18 13:36:03	58.38434167	-136.00273333	210	Optimal	0	0	0	0	Good	LFT	2018-09-12	SO-2017.1	0
SO_C_20180718_O_0188.JPG	2018-07-18 13:36:04	58.38432500	-136.00356944	209	Optimal	0	0	0	0	Good	LFT	2018-09-12	SO-2017.1	0
SO_C_20180718_O_0189.JPG	2018-07-18 13:36:05	58.38431111	-136.00440556	209	Optimal	0	0	0	0	Good	LFT	2018-09-12	SO-2017.1	0
SO_C_20180718_O_0190.JPG	2018-07-18 13:36:06	58.38430000	-136.00524167	209	Optimal	0	0	0	0	Good	LFT	2018-09-12	SO-2017.1	0
SO_C_20180718_O_0191.JPG	2018-07-18 13:36:07	58.38429167	-136.00607778	209	Optimal	0	0	1	0	Good	LFT	2018-09-12	SO-2017.1	0
SO_C_20180718_O_0192.JPG	2018-07-18 13:36:08	58.38428611	-136.00691667	209	Optimal	0	0	0	0	Good	LFT	2018-09-12	SO-2017.1	0
SO_C_20180718_O_0193.JPG	2018-07-18 13:36:09	58.38428333	-136.00775278	209	Optimal	0	0	0	0	Good	LFT	2018-09-12	SO-2017.1	0
SO_C_20180718_O_0194.JPG	2018-07-18 13:36:10	58.38428056	-136.00858889	209	Optimal	0	0	0	0	Good	LFT	2018-09-12	SO-2017.1	0
SO_C_20180718_O_0195.JPG	2018-07-18 13:36:11	58.38428333	-136.00942500	209	Optimal	0	0	0	0	Good	LFT	2018-09-12	SO-2017.1	0
SO_C_20180718_O_0196.JPG	2018-07-18 13:36:12	58.38428333	-136.01025833	209	Optimal	0	0	0	0	Good	LFT	2018-09-12	SO-2017.1	0
SO_C_20180718_O_0197.JPG	2018-07-18 13:36:13	58.38428333	-136.01108889	209	Optimal	0	0	0	0	Good	LFT	2018-09-12	SO-2017.1	0
SO_C_20180718_O_0198.JPG	2018-07-18 13:36:14	58.38428611	-136.01191667	209	Optimal	0	0	0	0	Good	LFT	2018-09-12	SO-2017.1	0
SO_C_20180718_O_0199.JPG	2018-07-18 13:36:15	58.38428889	-136.01274167	209	Optimal	0	0	0	0	Good	LFT	2018-09-12	SO-2017.1	0
SO_C_20180718_O_0200.JPG	2018-07-18 13:36:16	58.38429167	-136.01356667	210	Optimal	0	0	0	0	Good	LFT	2018-09-12	SO-2017.1	0
SO_C_20180718_O_0201.JPG	2018-07-18 13:36:17	58.38429444	-136.01439167	210	Optimal	0	0	0	0	Good	LFT	2018-09-14	SO-2017.1	0
SO_C_20180718_O_0202.JPG	2018-07-18 13:36:18	58.38430000	-136.01521389	210	Optimal	0	0	0	0	Good	LFT	2018-09-14	SO-2017.1	0
SO_C_20180718_O_0203.JPG	2018-07-18 13:36:19	58.38430833	-136.01603333	211	Optimal	0	0	0	0	Good	LFT	2018-09-14	SO-2017.1	0
SO_C_20180718_O_0204.JPG	2018-07-18 13:36:20	58.38431389	-136.01685556	212	Optimal	0	0	0	0	Good	LFT	2018-09-14	SO-2017.1	0
SO_C_20180718_O_0205.JPG	2018-07-18 13:36:21	58.38432222	-136.01768056	212	Optimal	0	0	1	0	Good	LFT	2018-09-14	SO-2017.1	0
SO_C_20180718_O_0206.JPG	2018-07-18 13:36:22	58.38433056	-136.01850833	213	Optimal	0	0	1	0	Good	LFT	2018-09-14	SO-2017.1	0
SO_C_20180718_O_0207.JPG	2018-07-18 13:36:23	58.38433611	-136.01934167	213	Optimal	0	0	1	0	Good	LFT	2018-09-14	SO-2017.1	0
SO_C_20180718_O_0208.JPG	2018-07-18 13:36:24	58.38433611	-136.02018056	213	Optimal	0	0	0	0	Good	LFT	2018-09-14	SO-2017.1	0
SO_C_20180718_O_0209.JPG	2018-07-18 13:36:25	58.38433333	-136.02101944	213	Optimal	0	0	0	0	Good	LFT	2018-09-14	SO-2017.1	0
SO_C_20180718_O_0210.JPG	2018-07-18 13:36:26	58.38433056	-136.02185833	213	Optimal	0	0	0	0	Good	LFT	2018-09-14	SO-2017.1	0
SO_C_20180718_O_0211.JPG	2018-07-18 13:36:27	58.38432778	-136.02269722	213	Optimal	0	0	0	0	Good	LFT	2018-09-14	SO-2017.1	0
SO_C_20180718_O_0212.JPG	2018-07-18 13:36:28	58.38432500	-136.02353333	213	Optimal	0	0	0	0	Good	LFT	2018-09-14	SO-2017.1	0
SO_C_20180718_O_0213.JPG	2018-07-18 13:36:29	58.38431667	-136.02436944	213	Optimal	0	0	0	0	Good	LFT	2018-09-14	SO-2017.1	0
SO_C_20180718_O_0214.JPG	2018-07-18 13:36:30	58.38431111	-136.02520556	213	Optimal	0	0	0	0	Good	LFT	2018-09-14	SO-2017.1	0
SO_C_20180718_O_0215.JPG	2018-07-18 13:36:31	58.38430000	-136.02604167	213	Optimal	0	0	0	0	Good	LFT	2018-09-14	SO-2017.1	0
SO_C_20180718_O_0216.JPG	2018-07-18 13:36:32	58.38429167	-136.02687500	213	Optimal	0	0	0	0	Good	LFT	2018-09-14	SO-2017.1	0
SO_C_20180718_O_0217.JPG	2018-07-18 13:36:33	58.38427778	-136.02770833	213	Optimal	0	0	0	0	Good	LFT	2018-09-14	SO-2017.1	0
SO_C_20180718_O_0218.JPG	2018-07-18 13:36:34	58.38426111	-136.02854444	213	Optimal	0	0	0	0	Good	LFT	2018-09-14	SO-2017.1	0
SO_C_20180718_O_0219.JPG	2018-07-18 13:36:35	58.38424444	-136.02938056	214	Optimal	0	0	0	0	Good	LFT	2018-09-14	SO-2017.1	0
SO_C_20180718_O_0220.JPG	2018-07-18 13:36:36	58.38422778	-136.03021944	214	Optimal	0	0	0	0	Good	LFT	2018-09-14	SO-2017.1	0
SO_C_20180718_O_0221.JPG	2018-07-18 13:36:37	58.38420833	-136.03105833	215	Optimal	2	0	0	0	Good	LFT	2018-09-14	SO-2017.1	0
SO_C_20180718_O_0222.JPG	2018-07-18 13:36:38	58.38418889	-136.03190278	215	Optimal	3	0	0	0	Good	LFT	2018-09-14	SO-2017.1	0
SO_C_20180718_O_0223.JPG	2018-07-18 13:36:39	58.38416667	-136.03275000	215	Optimal	0	0	0	0	Good	LFT	2018-09-14	SO-2017.1	0
SO_C_20180718_O_0224.JPG	2018-07-18 13:36:40	58.38415000	-136.03360000	215	Optimal	0	0	0	0	Good	LFT	2018-09-14	SO-2017.1	0
SO_C_20180718_O_0225.JPG	2018-07-18 13:36:41	58.38413611	-136.03445278	216	Optimal	0	0	0	0	Good	LFT	2018-09-14	SO-2017.1	0
SO_C_20180718_O_0226.JPG	2018-07-18 13:36:42	58.38412222	-136.03530556	216	Optimal	0	0	0	0	Good	LFT	2018-09-14	SO-2017.1	0
SO_C_20180718_O_0227.JPG	2018-07-18 13:36:43	58.38411389	-136.03616111	215	Optimal	0	0	1	1	Good	LFT	2018-09-14	SO-2017.1	0
SO_C_20180718_O_0228.JPG	2018-07-18 13:36:44	58.38410556	-136.03701944	215	Optimal	0	0	1	1	Good	LFT	2018-09-14	SO-2017.1	0
SO_C_20180718_O_0229.JPG	2018-07-18 13:36:45	58.38410556	-136.03787778	214	Optimal	0	0	1	1	Good	LFT	2018-09-14	SO-2017.1	0
SO_C_20180718_O_0230.JPG	2018-07-18 13:36:46	58.38410556	-136.03873333	214	Optimal	0	0	0	1	Good	LFT	2018-09-14	SO-2017.1	0
SO_C_20180718_O_0231.JPG	2018-07-18 13:36:47	58.38411111	-136.03959444	213	Optimal	0	0	0	1	Good	LFT	2018-09-14	SO-2017.1	0
SO_C_20180718_O_0233.JPG	2018-07-18 13:38:20	58.38801111	-136.05285278	206	Optimal	0	0	0	1	Good	LFT	2018-09-14	SO-2017.1	0
SO_C_20180718_O_0234.JPG	2018-07-18 13:38:21	58.38795278	-136.05202222	207	Optimal	0	0	0	1	Good	LFT	2018-09-14	SO-2017.1	0
SO_C_20180718_O_0235.JPG	2018-07-18 13:38:22	58.38791111	-136.05118889	207	Optimal	0	0	0	1	Good	LFT	2018-09-14	SO-2017.1	0
SO_C_20180718_O_0236.JPG	2018-07-18 13:38:23	58.38789167	-136.05035833	207	Optimal	0	0	0	1	Good	LFT	2018-09-14	SO-2017.1	0
SO_C_20180718_O_0237.JPG	2018-07-18 13:38:24	58.38788611	-136.04952500	207	Optimal	0	0	0	1	Good	LFT	2018-09-14	SO-2017.1	0
SO_C_20180718_O_0238.JPG	2018-07-18 13:38:25	58.38789167	-136.04869444	207	Optimal	0	0	0	1	Good	LFT	2018-09-14	SO-2017.1	0
SO_C_20180718_O_0239.JPG	2018-07-18 13:38:26	58.38790278	-136.04786111	208	Optimal	0	0	0	1	Good	LFT	2018-09-14	SO-2017.1	0
SO_C_20180718_O_0240.JPG	2018-07-18 13:38:27	58.38791944	-136.04703056	208	Optimal	0	0	0	1	Good	LFT	2018-09-14	SO-2017.1	0
SO_C_20180718_O_0241.JPG	2018-07-18 13:38:28	58.38794167	-136.04619722	208	Optimal	0	0	0	1	Good	LFT	2018-09-14	SO-2017.1	0
SO_C_20180718_O_0242.JPG	2018-07-18 13:38:29	58.38796667	-136.04536389	208	Optimal	0	0	0	1	Good	LFT	2018-09-14	SO-2017.1	0
SO_C_20180718_O_0243.JPG	2018-07-18 13:38:30	58.38799167	-136.04452778	208	Optimal	0	0	1	1	Good	LFT	2018-09-14	SO-2017.1	0
SO_C_20180718_O_0244.JPG	2018-07-18 13:38:31	58.38801944	-136.04369444	208	Optimal	0	0	1	1	Good	LFT	2018-09-14	SO-2017.1	0
SO_C_20180718_O_0245.JPG	2018-07-18 13:38:32	58.38804722	-136.04286111	208	Optimal	0	0	1	1	Good	LFT	2018-09-14	SO-2017.1	0
SO_C_20180718_O_0246.JPG	2018-07-18 13:38:33	58.38807500	-136.04202500	208	Optimal	0	0	1	0	Good	LFT	2018-09-14	SO-2017.1	0
SO_C_20180718_O_0247.JPG	2018-07-18 13:38:34	58.38810556	-136.04119722	208	Optimal	0	0	0	0	Good	LFT	2018-09-14	SO-2017.1	0
SO_C_20180718_O_0248.JPG	2018-07-18 13:38:35	58.38813333	-136.04037222	208	Optimal	0	0	0	0	Good	LFT	2018-09-14	SO-2017.1	0
SO_C_20180718_O_0249.JPG	2018-07-18 13:38:36	58.38816111	-136.03954444	208	Optimal	0	0	0	0	Good	LFT	2018-09-14	SO-2017.1	0
SO_C_20180718_O_0250.JPG	2018-07-18 13:38:37	58.38818889	-136.03872222	208	Optimal	0	0	0	0	Good	LFT	2018-09-14	SO-2017.1	0
SO_C_20180718_O_0251.JPG	2018-07-18 13:38:38	58.38821667	-136.03789444	208	Optimal	0	0	0	0	Good	LFT	2018-09-14	SO-2017.1	0
SO_C_20180718_O_0252.JPG	2018-07-18 13:38:39	58.38824167	-136.03706389	208	Optimal	0	0	0	0	Good	LFT	2018-09-14	SO-2017.1	0
SO_C_20180718_O_0253.JPG	2018-07-18 13:38:40	58.38826111	-136.03623611	209	Optimal	0	0	0	0	Good	LFT	2018-09-14	SO-2017.1	0
SO_C_20180718_O_0254.JPG	2018-07-18 13:38:41	58.38827500	-136.03540556	209	Optimal	0	0	0	0	Good	LFT	2018-09-14	SO-2017.1	0
SO_C_20180718_O_0255.JPG	2018-07-18 13:38:42	58.38829167	-136.03457500	209	Optimal	0	0	0	0	Good	LFT	2018-09-14	SO-2017.1	0
SO_C_20180718_O_0256.JPG	2018-07-18 13:38:43	58.38830556	-136.03374444	209	Optimal	0	0	0	0	Good	LFT	2018-09-14	SO-2017.1	0
SO_C_20180718_O_0257.JPG	2018-07-18 13:38:44	58.38831944	-136.03291111	209	Optimal	0	0	0	0	Good	LFT	2018-09-14	SO-2017.1	0
SO_C_20180718_O_0258.JPG	2018-07-18 13:38:45	58.38832778	-136.03207778	209	Optimal	0	0	0	0	Good	LFT	2018-09-14	SO-2017.1	0
SO_C_20180718_O_0259.JPG	2018-07-18 13:38:46	58.38833611	-136.03125000	209	Optimal	0	0	0	0	Good	LFT	2018-09-14	SO-2017.1	0
SO_C_20180718_O_0260.JPG	2018-07-18 13:38:47	58.38833611	-136.03041667	210	Optimal	0	0	0	0	Good	LFT	2018-09-14	SO-2017.1	0
SO_C_20180718_O_0261.JPG	2018-07-18 13:38:48	58.38833333	-136.02958056	210	Optimal	0	0	0	0	Good	LFT	2018-09-14	SO-2017.1	0
SO_C_20180718_O_0262.JPG	2018-07-18 13:38:49	58.38832500	-136.02874167	210	Optimal	0	0	0	0	Good	LFT	2018-09-14	SO-2017.1	0
SO_C_20180718_O_0263.JPG	2018-07-18 13:38:50	58.38831944	-136.02790278	210	Optimal	0	0	0	0	Good	LFT	2018-09-14	SO-2017.1	0
SO_C_20180718_O_0264.JPG	2018-07-18 13:38:51	58.38830833	-136.02706111	210	Optimal	0	0	0	0	Good	LFT	2018-09-14	SO-2017.1	0
SO_C_20180718_O_0265.JPG	2018-07-18 13:38:52	58.38828611	-136.02621111	210	Optimal	0	0	0	0	Good	LFT	2018-09-14	SO-2017.1	0
SO_C_20180718_O_0266.JPG	2018-07-18 13:38:53	58.38826389	-136.02536389	210	Optimal	0	0	0	0	Good	LFT	2018-09-14	SO-2017.1	0
SO_C_20180718_O_0267.JPG	2018-07-18 13:38:54	58.38824167	-136.02451667	210	Optimal	0	0	0	0	Good	LFT	2018-09-14	SO-2017.1	0
SO_C_20180718_O_0268.JPG	2018-07-18 13:38:55	58.38821667	-136.02367500	210	Optimal	0	0	0	0	Good	LFT	2018-09-14	SO-2017.1	0
SO_C_20180718_O_0269.JPG	2018-07-18 13:38:56	58.38819167	-136.02283056	210	Optimal	0	0	0	0	Good	LFT	2018-09-14	SO-2017.1	0
SO_C_20180718_O_0270.JPG	2018-07-18 13:38:57	58.38816667	-136.02198889	210	Optimal	0	0	0	0	Good	LFT	2018-09-14	SO-2017.1	0
SO_C_20180718_O_0271.JPG	2018-07-18 13:38:58	58.38815000	-136.02114722	210	Optimal	0	0	0	0	Good	LFT	2018-09-14	SO-2017.1	0
SO_C_20180718_O_0272.JPG	2018-07-18 13:38:59	58.38813611	-136.02031111	210	Optimal	0	0	0	0	Good	LFT	2018-09-14	SO-2017.1	0
SO_C_20180718_O_0273.JPG	2018-07-18 13:39:00	58.38812500	-136.01946944	210	Optimal	0	0	0	0	Good	LFT	2018-09-14	SO-2017.1	0
SO_C_20180718_O_0274.JPG	2018-07-18 13:39:01	58.38811667	-136.01863333	210	Optimal	0	0	0	0	Good	LFT	2018-09-14	SO-2017.1	0
SO_C_20180718_O_0275.JPG	2018-07-18 13:39:02	58.38811389	-136.01779444	211	Optimal	0	0	1	0	Good	LFT	2018-09-14	SO-2017.1	0
SO_C_20180718_O_0276.JPG	2018-07-18 13:39:03	58.38811389	-136.01695556	211	Optimal	0	0	0	0	Good	LFT	2018-09-14	SO-2017.1	0
SO_C_20180718_O_0277.JPG	2018-07-18 13:39:05	58.38813056	-136.01528333	211	Optimal	0	0	0	0	Good	LFT	2018-09-14	SO-2017.1	0
SO_C_20180718_O_0278.JPG	2018-07-18 13:39:06	58.38814444	-136.01445000	212	Optimal	0	0	0	0	Good	LFT	2018-09-14	SO-2017.1	0
SO_C_20180718_O_0279.JPG	2018-07-18 13:39:07	58.38815833	-136.01361389	212	Optimal	0	0	0	0	Good	LFT	2018-09-14	SO-2017.1	0
SO_C_20180718_O_0280.JPG	2018-07-18 13:39:08	58.38817500	-136.01277778	212	Optimal	0	0	0	0	Good	LFT	2018-09-14	SO-2017.1	0
SO_C_20180718_O_0281.JPG	2018-07-18 13:39:09	58.38819167	-136.01194444	212	Optimal	0	0	0	0	Good	LFT	2018-09-14	SO-2017.1	0
SO_C_20180718_O_0282.JPG	2018-07-18 13:39:10	58.38820833	-136.01110833	212	Optimal	0	0	1	0	Good	LFT	2018-09-14	SO-2017.1	0
SO_C_20180718_O_0283.JPG	2018-07-18 13:39:11	58.38822500	-136.01026944	212	Optimal	0	0	1	0	Good	LFT	2018-09-14	SO-2017.1	0
SO_C_20180718_O_0284.JPG	2018-07-18 13:39:12	58.38824167	-136.00943056	212	Optimal	0	0	0	0	Good	LFT	2018-09-14	SO-2017.1	0
SO_C_20180718_O_0285.JPG	2018-07-18 13:39:13	58.38825278	-136.00858889	212	Optimal	0	0	0	0	Good	LFT	2018-09-14	SO-2017.1	0
SO_C_20180718_O_0286.JPG	2018-07-18 13:39:14	58.38826111	-136.00774722	212	Optimal	0	0	0	0	Good	LFT	2018-09-14	SO-2017.1	0
SO_C_20180718_O_0287.JPG	2018-07-18 13:39:15	58.38827222	-136.00690278	212	Optimal	0	0	0	0	Good	LFT	2018-09-14	SO-2017.1	0
SO_C_20180718_O_0288.JPG	2018-07-18 13:39:16	58.38828056	-136.00605833	212	Optimal	0	0	0	0	Good	LFT	2018-09-14	SO-2017.1	0
SO_C_20180718_O_0289.JPG	2018-07-18 13:39:17	58.38828611	-136.00521389	211	Optimal	0	0	0	0	Good	LFT	2018-09-14	SO-2017.1	0
SO_C_20180718_O_0290.JPG	2018-07-18 13:39:18	58.38828889	-136.00436389	211	Optimal	0	0	0	0	Good	LFT	2018-09-14	SO-2017.1	0
SO_C_20180718_O_0291.JPG	2018-07-18 13:39:19	58.38828889	-136.00351389	210	Optimal	0	0	0	0	Good	LFT	2018-09-14	SO-2017.1	0
SO_C_20180718_O_0292.JPG	2018-07-18 13:39:20	58.38828611	-136.00266389	210	Optimal	0	0	0	0	Good	LFT	2018-09-14	SO-2017.1	0
SO_C_20180718_O_0293.JPG	2018-07-18 13:39:21	58.38828333	-136.00181389	209	Optimal	0	0	0	0	Good	LFT	2018-09-14	SO-2017.1	0
SO_C_20180718_O_0294.JPG	2018-07-18 13:39:22	58.38828056	-136.00096667	209	Optimal	0	0	0	0	Good	LFT	2018-09-14	SO-2017.1	0
SO_C_20180718_O_0295.JPG	2018-07-18 13:39:23	58.38826389	-136.00011389	208	Optimal	0	0	0	0	Good	LFT	2018-09-14	SO-2017.1	0
SO_C_20180718_O_0296.JPG	2018-07-18 13:39:24	58.38825556	-135.99926667	207	Optimal	0	0	0	0	Good	LFT	2018-09-14	SO-2017.1	0
SO_C_20180718_O_0297.JPG	2018-07-18 13:39:25	58.38825000	-135.99842778	207	Optimal	0	0	0	0	Good	LFT	2018-09-14	SO-2017.1	0
SO_C_20180718_O_0298.JPG	2018-07-18 13:39:26	58.38824444	-135.99758889	207	Optimal	0	0	0	0	Good	LFT	2018-09-14	SO-2017.1	0
SO_C_20180718_O_0299.JPG	2018-07-18 13:39:27	58.38823889	-135.99675556	207	Optimal	0	0	0	0	Good	LFT	2018-09-14	SO-2017.1	0
SO_C_20180718_O_0300.JPG	2018-07-18 13:39:28	58.38823333	-135.99592222	207	Optimal	0	0	0	0	Good	LFT	2018-09-14	SO-2017.1	0
SO_C_20180718_O_0301.JPG	2018-07-18 13:39:29	58.38822778	-135.99508889	207	Optimal	0	0	0	0	Good	LFT	2018-09-14	SO-2017.1	0
SO_C_20180718_O_0302.JPG	2018-07-18 13:39:30	58.38822222	-135.99425833	207	Optimal	0	0	0	0	Good	LFT	2018-09-14	SO-2017.1	0
SO_C_20180718_O_0303.JPG	2018-07-18 13:39:31	58.38822222	-135.99343611	207	Optimal	0	0	0	0	Good	LFT	2018-09-14	SO-2017.1	0
SO_C_20180718_O_0304.JPG	2018-07-18 13:39:32	58.38823056	-135.99261111	208	Optimal	0	0	0	0	Good	LFT	2018-09-14	SO-2017.1	0
SO_C_20180718_O_0305.JPG	2018-07-18 13:39:33	58.38824167	-135.99178611	208	Optimal	0	0	0	0	Good	LFT	2018-09-14	SO-2017.1	0
SO_C_20180718_O_0306.JPG	2018-07-18 13:39:34	58.38825278	-135.99096111	208	Optimal	0	0	0	0	Good	LFT	2018-09-14	SO-2017.1	0
SO_C_20180718_O_0307.JPG	2018-07-18 13:39:35	58.38826111	-135.99013889	209	Optimal	0	0	0	0	Good	LFT	2018-09-14	SO-2017.1	0
SO_C_20180718_O_0308.JPG	2018-07-18 13:39:36	58.38827222	-135.98931389	209	Optimal	0	0	0	0	Good	LFT	2018-09-14	SO-2017.1	0
SO_C_20180718_O_0309.JPG	2018-07-18 13:39:37	58.38827778	-135.98849167	209	Optimal	0	0	0	0	Good	LFT	2018-09-14	SO-2017.1	0
SO_C_20180718_O_0310.JPG	2018-07-18 13:39:38	58.38828611	-135.98766667	209	Optimal	0	0	0	0	Good	LFT	2018-09-14	SO-2017.1	0
SO_C_20180718_O_0311.JPG	2018-07-18 13:39:39	58.38829167	-135.98683889	209	Optimal	0	0	0	0	Good	LFT	2018-09-14	SO-2017.1	0
SO_C_20180718_O_0312.JPG	2018-07-18 13:39:40	58.38829722	-135.98601389	209	Optimal	0	0	0	0	Good	LFT	2018-09-14	SO-2017.1	0
SO_C_20180718_O_0313.JPG	2018-07-18 13:39:41	58.38830278	-135.98518333	209	Optimal	0	0	0	0	Good	LFT	2018-09-14	SO-2017.1	0
SO_C_20180718_O_0314.JPG	2018-07-18 13:39:42	58.38831111	-135.98435000	209	Optimal	0	0	0	0	Good	LFT	2018-09-14	SO-2017.1	0
SO_C_20180718_O_0315.JPG	2018-07-18 13:39:43	58.38831944	-135.98351667	209	Optimal	0	0	0	0	Good	LFT	2018-09-14	SO-2017.1	0
SO_C_20180718_O_0316.JPG	2018-07-18 13:39:44	58.38832500	-135.98268056	209	Optimal	0	0	0	0	Good	LFT	2018-09-14	SO-2017.1	0
SO_C_20180718_O_0317.JPG	2018-07-18 13:39:45	58.38833333	-135.98184722	209	Optimal	0	0	0	0	Good	LFT	2018-09-14	SO-2017.1	0
SO_C_20180718_O_0318.JPG	2018-07-18 13:39:46	58.38833889	-135.98101111	208	Optimal	0	0	0	0	Good	LFT	2018-09-14	SO-2017.1	0
SO_C_20180718_O_0319.JPG	2018-07-18 13:39:47	58.38834167	-135.98016944	208	Optimal	0	0	0	0	Good	LFT	2018-09-14	SO-2017.1	0
SO_C_20180718_O_0320.JPG	2018-07-18 13:39:48	58.38834167	-135.97933056	207	Optimal	0	0	0	0	Good	LFT	2018-09-14	SO-2017.1	0
SO_C_20180718_O_0321.JPG	2018-07-18 13:39:49	58.38833889	-135.97849167	207	Optimal	0	0	0	0	Good	LFT	2018-09-14	SO-2017.1	0
SO_C_20180718_O_0322.JPG	2018-07-18 13:39:50	58.38834167	-135.97765278	207	Optimal	0	0	0	0	Good	LFT	2018-09-14	SO-2017.1	0
SO_C_20180718_O_0323.JPG	2018-07-18 13:39:51	58.38834444	-135.97681389	206	Optimal	0	0	0	0	Good	LFT	2018-09-14	SO-2017.1	0
SO_C_20180718_O_0324.JPG	2018-07-18 13:39:52	58.38834444	-135.97597778	206	Optimal	0	0	0	0	Good	LFT	2018-09-14	SO-2017.1	0
SO_C_20180718_O_0325.JPG	2018-07-18 13:39:53	58.38835000	-135.97513889	206	Optimal	0	0	0	0	Good	LFT	2018-09-14	SO-2017.1	0
SO_C_20180718_O_0326.JPG	2018-07-18 13:39:54	58.38835000	-135.97429444	205	Optimal	0	0	0	0	Good	LFT	2018-09-14	SO-2017.1	0
SO_C_20180718_O_0327.JPG	2018-07-18 13:39:55	58.38834722	-135.97345278	205	Optimal	0	0	0	0	Good	LFT	2018-09-14	SO-2017.1	0
SO_C_20180718_O_0328.JPG	2018-07-18 13:39:56	58.38834444	-135.97261389	205	Optimal	0	0	0	0	Good	LFT	2018-09-14	SO-2017.1	0
SO_C_20180718_O_0329.JPG	2018-07-18 13:39:57	58.38834167	-135.97177500	204	Optimal	0	0	0	0	Good	LFT	2018-09-14	SO-2017.1	0
SO_C_20180718_O_0330.JPG	2018-07-18 13:39:58	58.38833889	-135.97093889	204	Optimal	0	0	0	0	Good	LFT	2018-09-14	SO-2017.1	0
SO_C_20180718_O_0331.JPG	2018-07-18 13:39:59	58.38833889	-135.97010556	204	Optimal	0	0	0	0	Good	LFT	2018-09-14	SO-2017.1	0
SO_C_20180718_O_0332.JPG	2018-07-18 13:40:00	58.38834167	-135.96927500	204	Optimal	0	0	0	0	Good	LFT	2018-09-14	SO-2017.1	0
SO_C_20180718_O_0333.JPG	2018-07-18 13:40:01	58.38834167	-135.96844167	204	Optimal	0	0	0	0	Good	LFT	2018-09-14	SO-2017.1	0
SO_C_20180718_O_0334.JPG	2018-07-18 13:40:02	58.38834722	-135.96760833	204	Optimal	0	0	0	0	Good	LFT	2018-09-14	SO-2017.1	0
SO_C_20180718_O_0335.JPG	2018-07-18 13:40:03	58.38834722	-135.96677778	204	Optimal	0	0	0	0	Good	LFT	2018-09-14	SO-2017.1	0
SO_C_20180718_O_0336.JPG	2018-07-18 13:40:04	58.38835000	-135.96594722	204	Optimal	0	0	0	0	Good	LFT	2018-09-14	SO-2017.1	0
SO_C_20180718_O_0337.JPG	2018-07-18 13:40:05	58.38835556	-135.96511667	204	Optimal	1	0	0	0	Good	LFT	2018-09-14	SO-2017.1	0
SO_C_20180718_O_0338.JPG	2018-07-18 13:40:06	58.38836111	-135.96428333	204	Optimal	0	0	0	0	Good	LFT	2018-09-14	SO-2017.1	0
SO_C_20180718_O_0339.JPG	2018-07-18 13:40:07	58.38836389	-135.96345000	204	Optimal	0	0	0	0	Good	LFT	2018-09-14	SO-2017.1	0
SO_C_20180718_O_0340.JPG	2018-07-18 13:40:08	58.38836667	-135.96261111	204	Optimal	0	0	0	0	Good	LFT	2018-09-14	SO-2017.1	0
SO_C_20180718_O_0341.JPG	2018-07-18 13:40:09	58.38836667	-135.96177500	204	Optimal	0	0	0	0	Good	LFT	2018-09-14	SO-2017.1	0
SO_C_20180718_O_0342.JPG	2018-07-18 13:40:10	58.38837222	-135.96093611	204	Optimal	0	0	0	0	Good	LFT	2018-09-14	SO-2017.1	0
SO_C_20180718_O_0343.JPG	2018-07-18 13:40:11	58.38837500	-135.96010278	204	Optimal	0	0	0	0	Good	LFT	2018-09-14	SO-2017.1	0
SO_C_20180718_O_0344.JPG	2018-07-18 13:40:12	58.38838056	-135.95926667	204	Optimal	0	0	0	0	Good	LFT	2018-09-14	SO-2017.1	0
SO_C_20180718_O_0345.JPG	2018-07-18 13:40:13	58.38838333	-135.95843333	204	Optimal	0	0	0	0	Good	LFT	2018-09-14	SO-2017.1	0
SO_C_20180718_O_0346.JPG	2018-07-18 13:40:14	58.38839167	-135.95760000	204	Optimal	0	0	0	0	Good	LFT	2018-09-14	SO-2017.1	0
SO_C_20180718_O_0347.JPG	2018-07-18 13:40:15	58.38840278	-135.95676667	204	Optimal	0	0	0	0	Good	LFT	2018-09-14	SO-2017.1	0
SO_C_20180718_O_0348.JPG	2018-07-18 13:40:16	58.38840833	-135.95593611	204	Optimal	0	0	0	0	Good	LFT	2018-09-14	SO-2017.1	0
SO_C_20180718_O_0349.JPG	2018-07-18 13:40:17	58.38841944	-135.95510556	204	Optimal	0	0	0	0	Good	LFT	2018-09-14	SO-2017.1	0
SO_C_20180718_O_0351.JPG	2018-07-18 13:40:18	58.38843333	-135.95427500	204	Optimal	0	0	0	0	Good	LFT	2018-09-14	SO-2017.1	0
SO_C_20180718_O_0352.JPG	2018-07-18 13:40:19	58.38844722	-135.95344444	205	Optimal	0	0	0	0	Good	LFT	2018-09-14	SO-2017.1	0
SO_C_20180718_O_0353.JPG	2018-07-18 13:40:20	58.38846667	-135.95261944	205	Optimal	0	0	0	0	Good	LFT	2018-09-14	SO-2017.1	0
SO_C_20180718_O_0354.JPG	2018-07-18 13:40:21	58.38848611	-135.95180000	205	Optimal	0	0	0	0	Good	LFT	2018-09-14	SO-2017.1	0
SO_C_20180718_O_0355.JPG	2018-07-18 13:40:22	58.38850278	-135.95097778	205	Optimal	0	0	0	0	Good	LFT	2018-09-14	SO-2017.1	0
SO_C_20180718_O_0356.JPG	2018-07-18 13:40:23	58.38852222	-135.95016111	205	Optimal	0	0	0	0	Good	LFT	2018-09-14	SO-2017.1	0
SO_C_20180718_O_0357.JPG	2018-07-18 13:40:24	58.38854167	-135.94934722	206	Optimal	0	0	0	0	Good	LFT	2018-09-14	SO-2017.1	0
SO_C_20180718_O_0358.JPG	2018-07-18 13:40:25	58.38856111	-135.94853056	206	Optimal	0	0	0	0	Good	LFT	2018-09-14	SO-2017.1	0
SO_C_20180718_O_0359.JPG	2018-07-18 13:40:26	58.38858056	-135.94771389	206	Optimal	0	0	0	0	Good	LFT	2018-09-14	SO-2017.1	0
SO_C_20180718_O_0360.JPG	2018-07-18 13:40:27	58.38860000	-135.94689722	207	Optimal	0	0	0	0	Good	LFT	2018-09-14	SO-2017.1	0
SO_C_20180718_O_0361.JPG	2018-07-18 13:40:28	58.38861667	-135.94607778	207	Optimal	0	0	0	0	Good	LFT	2018-09-14	SO-2017.1	0
SO_C_20180718_O_0362.JPG	2018-07-18 13:40:29	58.38863611	-135.94526111	208	Optimal	0	0	0	0	Good	LFT	2018-09-14	SO-2017.1	0
SO_C_20180718_O_0363.JPG	2018-07-18 13:40:30	58.38865278	-135.94443889	208	Optimal	0	0	0	0	Good	LFT	2018-09-14	SO-2017.1	0
SO_C_20180718_O_0364.JPG	2018-07-18 13:40:31	58.38866667	-135.94361944	208	Optimal	0	0	0	0	Good	LFT	2018-09-14	SO-2017.1	0
SO_C_20180718_O_0365.JPG	2018-07-18 13:40:32	58.38868056	-135.94279444	208	Optimal	0	0	0	0	Good	LFT	2018-09-14	SO-2017.1	0
SO_C_20180718_O_0366.JPG	2018-07-18 13:40:33	58.38868889	-135.94196389	208	Optimal	0	0	0	0	Good	LFT	2018-09-14	SO-2017.1	0
SO_C_20180718_O_0367.JPG	2018-07-18 13:40:34	58.38869444	-135.94113333	208	Optimal	0	0	0	0	Good	LFT	2018-09-14	SO-2017.1	0
SO_C_20180718_O_0368.JPG	2018-07-18 13:40:35	58.38870000	-135.94030278	208	Optimal	0	0	0	0	Good	LFT	2018-09-14	SO-2017.1	0
SO_C_20180718_O_0369.JPG	2018-07-18 13:40:36	58.38870556	-135.93947500	208	Optimal	0	0	0	0	Good	LFT	2018-09-14	SO-2017.1	0
SO_C_20180718_O_0370.JPG	2018-07-18 13:40:37	58.38871111	-135.93864444	208	Optimal	0	0	0	0	Good	LFT	2018-09-14	SO-2017.1	0
SO_C_20180718_O_0371.JPG	2018-07-18 13:40:38	58.38871111	-135.93781111	208	Optimal	0	0	0	0	Good	LFT	2018-09-14	SO-2017.1	0
SO_C_20180718_O_0372.JPG	2018-07-18 13:40:39	58.38871389	-135.93697778	207	Optimal	0	0	0	0	Good	LFT	2018-09-14	SO-2017.1	0
SO_C_20180718_O_0373.JPG	2018-07-18 13:40:40	58.38871389	-135.93614722	207	Optimal	0	0	0	0	Good	LFT	2018-09-14	SO-2017.1	0
SO_C_20180718_O_0374.JPG	2018-07-18 13:40:41	58.38871944	-135.93531667	207	Optimal	0	0	0	0	Good	LFT	2018-09-14	SO-2017.1	0
SO_C_20180718_O_0375.JPG	2018-07-18 13:40:42	58.38872222	-135.93448889	207	Optimal	0	0	0	0	Good	LFT	2018-09-14	SO-2017.1	0
SO_C_20180718_O_0376.JPG	2018-07-18 13:40:43	58.38872500	-135.93366111	207	Optimal	0	0	0	0	Good	LFT	2018-09-14	SO-2017.1	0
SO_C_20180718_O_0377.JPG	2018-07-18 13:40:44	58.38873056	-135.93283611	207	Optimal	0	0	0	0	Good	LFT	2018-09-14	SO-2017.1	0
SO_C_20180718_O_0378.JPG	2018-07-18 13:40:45	58.38873889	-135.93201389	208	Optimal	0	0	0	0	Good	LFT	2018-09-14	SO-2017.1	0
SO_C_20180718_O_0379.JPG	2018-07-18 13:40:46	58.38874722	-135.93119167	208	Optimal	0	0	0	0	Good	LFT	2018-09-14	SO-2017.1	0
SO_C_20180718_O_0380.JPG	2018-07-18 13:40:47	58.38875278	-135.93036944	208	Optimal	0	0	0	0	Good	LFT	2018-09-14	SO-2017.1	0
SO_C_20180718_O_0381.JPG	2018-07-18 13:40:48	58.38875833	-135.92954722	208	Optimal	0	0	0	0	Good	LFT	2018-09-14	SO-2017.1	0
SO_C_20180718_O_0382.JPG	2018-07-18 13:40:49	58.38876667	-135.92873056	208	Optimal	0	0	0	0	Good	LFT	2018-09-14	SO-2017.1	0
SO_C_20180718_O_0383.JPG	2018-07-18 13:40:50	58.38877778	-135.92791389	208	Optimal	0	0	0	0	Good	LFT	2018-09-14	SO-2017.1	0
SO_C_20180718_O_0384.JPG	2018-07-18 13:40:51	58.38878333	-135.92708611	209	Optimal	0	0	0	0	Good	LFT	2018-09-14	SO-2017.1	0
SO_C_20180718_O_0385.JPG	2018-07-18 13:40:52	58.38878611	-135.92626111	209	Optimal	0	0	0	0	Good	LFT	2018-09-14	SO-2017.1	0
SO_C_20180718_O_0386.JPG	2018-07-18 13:40:53	58.38878889	-135.92544167	209	Optimal	0	0	0	0	Good	LFT	2018-09-14	SO-2017.1	0
SO_C_20180718_O_0387.JPG	2018-07-18 13:40:54	58.38879167	-135.92462222	209	Optimal	0	0	0	0	Good	LFT	2018-09-14	SO-2017.1	0
SO_C_20180718_O_0388.JPG	2018-07-18 13:40:55	58.38879167	-135.92380556	209	Optimal	0	0	1	0	Good	LFT	2018-09-14	SO-2017.1	0
SO_C_20180718_O_0389.JPG	2018-07-18 13:40:56	58.38879167	-135.92298889	210	Optimal	0	0	1	1	Good	LFT	2018-09-14	SO-2017.1	0
SO_C_20180718_O_0390.JPG	2018-07-18 13:40:57	58.38879444	-135.92217222	210	Optimal	0	0	1	1	Good	LFT	2018-09-14	SO-2017.1	0
SO_C_20180718_O_0391.JPG	2018-07-18 13:40:58	58.38879444	-135.92136111	210	Optimal	0	0	0	1	Good	LFT	2018-09-14	SO-2017.1	0
SO_C_20180718_O_0392.JPG	2018-07-18 13:40:59	58.38879444	-135.92055000	210	Optimal	0	0	0	1	Good	LFT	2018-09-14	SO-2017.1	0
SO_C_20180718_O_0393.JPG	2018-07-18 13:44:53	58.46474722	-135.85865556	207	Optimal	0	0	0	1	Good	LFT	2018-09-14	SO-2017.1	0
SO_C_20180718_O_0394.JPG	2018-07-18 13:44:54	58.46481667	-135.85940833	206	Optimal	0	0	0	1	Good	LFT	2018-09-14	SO-2017.1	0
SO_C_20180718_O_0395.JPG	2018-07-18 13:44:55	58.46485556	-135.86016944	206	Optimal	0	0	0	1	Good	LFT	2018-09-14	SO-2017.1	0
SO_C_20180718_O_0396.JPG	2018-07-18 13:44:56	58.46486389	-135.86093889	205	Optimal	0	0	0	1	Good	LFT	2018-09-14	SO-2017.1	0
SO_C_20180718_O_0397.JPG	2018-07-18 13:44:57	58.46485000	-135.86171111	204	Optimal	0	0	0	1	Good	LFT	2018-09-14	SO-2017.1	0
SO_C_20180718_O_0398.JPG	2018-07-18 13:44:58	58.46481944	-135.86248333	204	Optimal	0	0	0	1	Good	LFT	2018-09-14	SO-2017.1	0
SO_C_20180718_O_0399.JPG	2018-07-18 13:44:59	58.46478333	-135.86325278	204	Optimal	0	0	0	1	Good	LFT	2018-09-14	SO-2017.1	0
SO_C_20180718_O_0400.JPG	2018-07-18 13:45:00	58.46475000	-135.86401944	203	Optimal	0	0	0	1	Good	LFT	2018-09-14	SO-2017.1	0
SO_C_20180718_O_0401.JPG	2018-07-18 13:45:01	58.46471667	-135.86478333	203	Optimal	0	0	0	1	Good	LFT	2018-09-14	SO-2017.1	0
SO_C_20180718_O_0402.JPG	2018-07-18 13:45:02	58.46467778	-135.86555000	203	Optimal	0	0	0	1	Good	LFT	2018-09-14	SO-2017.1	0
SO_C_20180718_O_0403.JPG	2018-07-18 13:45:03	58.46464444	-135.86630833	203	Optimal	0	0	0	1	Good	LFT	2018-09-14	SO-2017.1	0
SO_C_20180718_O_0404.JPG	2018-07-18 13:45:04	58.46461111	-135.86706944	202	Optimal	0	0	0	1	Good	LFT	2018-09-14	SO-2017.1	0
SO_C_20180718_O_0405.JPG	2018-07-18 13:45:05	58.46458056	-135.86782500	202	Optimal	0	0	0	1	Good	LFT	2018-09-14	SO-2017.1	0
SO_C_20180718_O_0406.JPG	2018-07-18 13:45:06	58.46455833	-135.86857500	202	Optimal	0	0	0	1	Good	LFT	2018-09-14	SO-2017.1	0
SO_C_20180718_O_0407.JPG	2018-07-18 13:45:07	58.46454167	-135.86932778	203	Optimal	0	0	0	1	Good	LFT	2018-09-14	SO-2017.1	0
SO_C_20180718_O_0408.JPG	2018-07-18 13:45:08	58.46453333	-135.87007778	203	Optimal	0	0	0	1	Good	LFT	2018-09-14	SO-2017.1	0
SO_C_20180718_O_0409.JPG	2018-07-18 13:45:09	58.46453333	-135.87083333	204	Optimal	0	0	0	1	Good	LFT	2018-09-14	SO-2017.1	0
SO_C_20180718_O_0410.JPG	2018-07-18 13:45:10	58.46453611	-135.87158611	205	Optimal	0	0	0	1	Good	LFT	2018-09-14	SO-2017.1	0
SO_C_20180718_O_0411.JPG	2018-07-18 13:45:11	58.46454444	-135.87234722	205	Optimal	0	0	0	1	Good	LFT	2018-09-14	SO-2017.1	0
SO_C_20180718_O_0412.JPG	2018-07-18 13:45:12	58.46455000	-135.87311111	205	Optimal	0	0	0	1	Good	LFT	2018-09-14	SO-2017.1	0
SO_C_20180718_O_0413.JPG	2018-07-18 13:45:13	58.46455278	-135.87388056	206	Optimal	0	0	0	1	Good	LFT	2018-09-14	SO-2017.1	0
SO_C_20180718_O_0414.JPG	2018-07-18 13:45:14	58.46455556	-135.87465278	206	Optimal	0	0	0	1	Good	LFT	2018-09-14	SO-2017.1	0
SO_C_20180718_O_0415.JPG	2018-07-18 13:45:15	58.46456111	-135.87542222	205	Optimal	0	0	0	1	Good	LFT	2018-09-14	SO-2017.1	0
SO_C_20180718_O_0416.JPG	2018-07-18 13:45:16	58.46456667	-135.87619167	205	Optimal	0	0	0	1	Good	LFT	2018-09-14	SO-2017.1	0
SO_C_20180718_O_0417.JPG	2018-07-18 13:45:17	58.46456944	-135.87696389	205	Optimal	0	0	0	1	Good	LFT	2018-09-14	SO-2017.1	0
SO_C_20180718_O_0418.JPG	2018-07-18 13:45:18	58.46456944	-135.87773333	204	Optimal	0	0	0	1	Good	LFT	2018-09-14	SO-2017.1	0
SO_C_20180718_O_0419.JPG	2018-07-18 13:45:19	58.46456667	-135.87850000	204	Optimal	0	0	0	1	Good	LFT	2018-09-14	SO-2017.1	0
SO_C_20180718_O_0420.JPG	2018-07-18 13:45:20	58.46456389	-135.87926389	204	Optimal	0	0	0	1	Good	LFT	2018-09-14	SO-2017.1	0
SO_C_20180718_O_0421.JPG	2018-07-18 13:45:21	58.46456667	-135.88002222	204	Optimal	0	0	0	1	Good	LFT	2018-09-14	SO-2017.1	0
SO_C_20180718_O_0422.JPG	2018-07-18 13:45:22	58.46456944	-135.88077778	204	Optimal	0	0	0	1	Good	LFT	2018-09-14	SO-2017.1	0
SO_C_20180718_O_0423.JPG	2018-07-18 13:45:23	58.46457222	-135.88153333	204	Optimal	0	0	1	1	Good	LFT	2018-09-14	SO-2017.1	0
SO_C_20180718_O_0424.JPG	2018-07-18 13:45:24	58.46458056	-135.88228056	204	Optimal	0	0	0	1	Good	LFT	2018-09-14	SO-2017.1	0
SO_C_20180718_O_0425.JPG	2018-07-18 13:45:25	58.46458611	-135.88302778	205	Optimal	0	0	0	1	Good	LFT	2018-09-14	SO-2017.1	0
SO_C_20180718_O_0426.JPG	2018-07-18 13:45:26	58.46459444	-135.88377500	206	Optimal	0	0	0	1	Good	LFT	2018-09-14	SO-2017.1	0
SO_C_20180718_O_0427.JPG	2018-07-18 13:45:27	58.46459444	-135.88451944	206	Optimal	0	0	0	1	Good	LFT	2018-09-14	SO-2017.1	0
SO_C_20180718_O_0428.JPG	2018-07-18 13:45:28	58.46459722	-135.88526667	207	Optimal	0	0	1	1	Good	LFT	2018-09-14	SO-2017.1	0
SO_C_20180718_O_0429.JPG	2018-07-18 13:45:29	58.46460000	-135.88601111	208	Optimal	0	0	0	1	Good	LFT	2018-09-14	SO-2017.1	0
SO_C_20180718_O_0430.JPG	2018-07-18 13:45:30	58.46460000	-135.88675556	208	Optimal	0	0	0	0	Good	LFT	2018-09-14	SO-2017.1	0
SO_C_20180718_O_0431.JPG	2018-07-18 13:45:31	58.46458889	-135.88748889	209	Optimal	0	0	0	1	Good	LFT	2018-09-14	SO-2017.1	0
SO_C_20180718_O_0432.JPG	2018-07-18 13:45:32	58.46459167	-135.88823889	209	Optimal	0	0	0	1	Good	LFT	2018-09-14	SO-2017.1	0
SO_C_20180718_O_0433.JPG	2018-07-18 13:45:33	58.46459167	-135.88898611	209	Optimal	0	0	0	1	Good	LFT	2018-09-14	SO-2017.1	0
SO_C_20180718_O_0434.JPG	2018-07-18 13:45:34	58.46458889	-135.88973333	209	Optimal	0	0	0	1	Good	LFT	2018-09-14	SO-2017.1	0
SO_C_20180718_O_0435.JPG	2018-07-18 13:45:35	58.46458611	-135.89049167	209	Optimal	0	0	1	1	Good	LFT	2018-09-14	SO-2017.1	0
SO_C_20180718_O_0436.JPG	2018-07-18 13:45:36	58.46458333	-135.89124444	209	Optimal	0	0	1	1	Good	LFT	2018-09-14	SO-2017.1	0
SO_C_20180718_O_0437.JPG	2018-07-18 13:45:37	58.46457500	-135.89200000	209	Optimal	0	0	1	1	Good	LFT	2018-09-14	SO-2017.1	0
SO_C_20180718_O_0438.JPG	2018-07-18 13:45:38	58.46455833	-135.89276667	208	Optimal	0	0	0	1	Good	LFT	2018-09-14	SO-2017.1	0
SO_C_20180718_O_0439.JPG	2018-07-18 13:45:39	58.46454167	-135.89353056	208	Optimal	0	0	1	1	Good	LFT	2018-09-14	SO-2017.1	0
SO_C_20180718_O_0440.JPG	2018-07-18 13:45:40	58.46452222	-135.89430000	208	Optimal	0	0	1	0	Good	LFT	2018-09-14	SO-2017.1	0
SO_C_20180718_O_0441.JPG	2018-07-18 13:45:41	58.46450278	-135.89506944	208	Optimal	0	0	1	0	Good	LFT	2018-09-14	SO-2017.1	0
SO_C_20180718_O_0442.JPG	2018-07-18 13:45:42	58.46448056	-135.89585556	208	Optimal	0	0	0	0	Good	LFT	2018-09-14	SO-2017.1	0
SO_C_20180718_O_0443.JPG	2018-07-18 13:45:43	58.46447222	-135.89661667	208	Optimal	0	0	0	0	Good	LFT	2018-09-14	SO-2017.1	0
SO_C_20180718_O_0444.JPG	2018-07-18 13:45:44	58.46445833	-135.89737500	208	Optimal	0	0	0	0	Good	LFT	2018-09-14	SO-2017.1	0
SO_C_20180718_O_0445.JPG	2018-07-18 13:45:45	58.46442500	-135.89813889	208	Optimal	0	0	0	0	Good	LFT	2018-09-14	SO-2017.1	0
SO_C_20180718_O_0446.JPG	2018-07-18 13:45:46	58.46439444	-135.89890278	208	Optimal	0	0	0	0	Good	LFT	2018-09-14	SO-2017.1	0
SO_C_20180718_O_0447.JPG	2018-07-18 13:45:47	58.46436944	-135.89967222	209	Optimal	0	0	0	0	Good	LFT	2018-09-14	SO-2017.1	0
SO_C_20180718_O_0448.JPG	2018-07-18 13:45:48	58.46434444	-135.90045556	209	Optimal	0	0	0	0	Good	LFT	2018-09-14	SO-2017.1	0
SO_C_20180718_O_0449.JPG	2018-07-18 13:45:49	58.46432500	-135.90123333	209	Optimal	0	0	0	0	Good	LFT	2018-09-14	SO-2017.1	0
SO_C_20180718_O_0450.JPG	2018-07-18 13:45:50	58.46430000	-135.90201111	210	Optimal	0	0	0	0	Good	LFT	2018-09-14	SO-2017.1	0
SO_C_20180718_O_0451.JPG	2018-07-18 13:45:51	58.46428333	-135.90279444	210	Optimal	0	0	0	0	Good	LFT	2018-09-14	SO-2017.1	0
SO_C_20180718_O_0452.JPG	2018-07-18 13:45:52	58.46426944	-135.90358056	210	Optimal	0	0	0	0	Good	LFT	2018-09-14	SO-2017.1	0
SO_C_20180718_O_0453.JPG	2018-07-18 13:45:53	58.46425556	-135.90436944	210	Optimal	0	0	0	0	Good	LFT	2018-09-14	SO-2017.1	0
SO_C_20180718_O_0454.JPG	2018-07-18 13:45:54	58.46424444	-135.90516111	210	Optimal	0	0	1	0	Good	LFT	2018-09-14	SO-2017.1	0
SO_C_20180718_O_0455.JPG	2018-07-18 13:45:55	58.46423333	-135.90595833	210	Optimal	0	0	0	0	Good	LFT	2018-09-14	SO-2017.1	0
SO_C_20180718_O_0456.JPG	2018-07-18 13:45:56	58.46422222	-135.90675833	210	Optimal	0	0	0	0	Good	LFT	2018-09-14	SO-2017.1	0
SO_C_20180718_O_0457.JPG	2018-07-18 13:45:57	58.46420833	-135.90756111	210	Optimal	0	0	0	1	Good	LFT	2018-09-14	SO-2017.1	0
SO_C_20180718_O_0458.JPG	2018-07-18 13:45:58	58.46419444	-135.90836111	209	Optimal	0	0	0	1	Good	LFT	2018-09-14	SO-2017.1	0
SO_C_20180718_O_0459.JPG	2018-07-18 13:45:59	58.46418333	-135.90916389	209	Optimal	0	0	0	1	Good	LFT	2018-09-14	SO-2017.1	0
SO_C_20180718_O_0460.JPG	2018-07-18 13:46:00	58.46416944	-135.90996667	209	Optimal	0	0	0	1	Good	LFT	2018-09-14	SO-2017.1	0
SO_C_20180718_O_0461.JPG	2018-07-18 13:46:01	58.46415556	-135.91076667	209	Optimal	0	0	0	1	Good	LFT	2018-09-14	SO-2017.1	0
SO_C_20180718_O_0462.JPG	2018-07-18 13:46:02	58.46414722	-135.91156667	209	Optimal	0	0	0	1	Good	LFT	2018-09-14	SO-2017.1	0
SO_C_20180718_O_0463.JPG	2018-07-18 13:46:03	58.46414167	-135.91236389	209	Optimal	0	0	0	1	Good	LFT	2018-09-14	SO-2017.1	0
SO_C_20180718_O_0464.JPG	2018-07-18 13:46:04	58.46414167	-135.91316111	210	Optimal	0	0	0	1	Good	LFT	2018-09-14	SO-2017.1	0
SO_C_20180718_O_0465.JPG	2018-07-18 13:46:05	58.46414444	-135.91395833	210	Optimal	0	0	0	1	Good	LFT	2018-09-14	SO-2017.1	0
SO_C_20180718_O_0466.JPG	2018-07-18 13:46:06	58.46415556	-135.91475556	211	Optimal	0	0	0	1	Good	LFT	2018-09-14	SO-2017.1	0
SO_C_20180718_O_0467.JPG	2018-07-18 13:46:07	58.46416389	-135.91554722	212	Optimal	0	0	0	1	Good	LFT	2018-09-14	SO-2017.1	0
SO_C_20180718_O_0468.JPG	2018-07-18 13:46:08	58.46417778	-135.91633889	213	Optimal	0	0	0	1	Good	LFT	2018-09-14	SO-2017.1	0
SO_C_20180718_O_0469.JPG	2018-07-18 13:46:09	58.46418889	-135.91713611	213	Optimal	0	0	0	1	Good	LFT	2018-09-14	SO-2017.1	0
SO_C_20180718_O_0470.JPG	2018-07-18 13:46:10	58.46420000	-135.91793056	214	Optimal	0	0	0	1	Good	LFT	2018-09-14	SO-2017.1	0
SO_C_20180718_O_0471.JPG	2018-07-18 13:46:11	58.46420556	-135.91873056	214	Optimal	0	0	0	1	Good	LFT	2018-09-14	SO-2017.1	0
SO_C_20180718_O_0472.JPG	2018-07-18 13:46:12	58.46421389	-135.91952778	215	Optimal	0	0	0	1	Good	LFT	2018-09-14	SO-2017.1	0
SO_C_20180718_O_0473.JPG	2018-07-18 13:46:13	58.46421667	-135.92032500	215	Optimal	0	0	0	1	Good	LFT	2018-09-14	SO-2017.1	0
SO_C_20180718_O_0474.JPG	2018-07-18 13:46:14	58.46422222	-135.92112500	216	Optimal	0	0	0	1	Good	LFT	2018-09-14	SO-2017.1	0
SO_C_20180718_O_0475.JPG	2018-07-18 13:46:15	58.46422222	-135.92192778	216	Optimal	0	0	0	1	Good	LFT	2018-09-14	SO-2017.1	0
SO_C_20180718_O_0476.JPG	2018-07-18 13:46:16	58.46422222	-135.92272778	216	Optimal	0	0	0	1	Good	LFT	2018-09-14	SO-2017.1	0
SO_C_20180718_O_0477.JPG	2018-07-18 13:46:17	58.46421667	-135.92352778	216	Optimal	0	0	0	1	Good	LFT	2018-09-14	SO-2017.1	0
SO_C_20180718_O_0478.JPG	2018-07-18 13:46:18	58.46421111	-135.92432778	216	Optimal	0	0	0	1	Good	LFT	2018-09-14	SO-2017.1	0
SO_C_20180718_O_0479.JPG	2018-07-18 13:46:19	58.46420556	-135.92512778	216	Optimal	0	0	0	1	Good	LFT	2018-09-14	SO-2017.1	0
SO_C_20180718_O_0480.JPG	2018-07-18 13:46:20	58.46420278	-135.92592778	216	Optimal	0	0	0	1	Good	LFT	2018-09-14	SO-2017.1	0
SO_C_20180718_O_0481.JPG	2018-07-18 13:46:21	58.46420278	-135.92673056	216	Optimal	0	0	0	1	Good	LFT	2018-09-14	SO-2017.1	0
SO_C_20180718_O_0482.JPG	2018-07-18 13:46:22	58.46420000	-135.92753333	217	Optimal	0	0	0	1	Good	LFT	2018-09-14	SO-2017.1	0
SO_C_20180718_O_0483.JPG	2018-07-18 13:46:23	58.46419722	-135.92833889	217	Optimal	0	0	0	1	Good	LFT	2018-09-14	SO-2017.1	0
SO_C_20180718_O_0484.JPG	2018-07-18 13:46:24	58.46419444	-135.92914722	217	Optimal	0	0	0	1	Good	LFT	2018-09-14	SO-2017.1	0
SO_C_20180718_O_0485.JPG	2018-07-18 13:46:25	58.46418333	-135.92995000	217	Optimal	0	0	0	1	Good	LFT	2018-09-14	SO-2017.1	0
SO_C_20180718_O_0486.JPG	2018-07-18 13:46:26	58.46417222	-135.93075556	217	Optimal	0	0	0	1	Good	LFT	2018-09-14	SO-2017.1	0
SO_C_20180718_O_0487.JPG	2018-07-18 13:46:27	58.46415833	-135.93155833	217	Optimal	0	0	0	1	Good	LFT	2018-09-14	SO-2017.1	0
SO_C_20180718_O_0488.JPG	2018-07-18 13:46:28	58.46414444	-135.93236389	217	Optimal	0	0	0	1	Good	LFT	2018-09-14	SO-2017.1	0
SO_C_20180718_O_0489.JPG	2018-07-18 13:46:29	58.46413056	-135.93317222	217	Optimal	0	0	0	1	Good	LFT	2018-09-14	SO-2017.1	0
SO_C_20180718_O_0490.JPG	2018-07-18 13:46:30	58.46411389	-135.93398056	217	Optimal	0	0	0	1	Good	LFT	2018-09-14	SO-2017.1	0
SO_C_20180718_O_0491.JPG	2018-07-18 13:46:31	58.46410000	-135.93479167	217	Optimal	0	0	0	1	Good	LFT	2018-09-14	SO-2017.1	0
SO_C_20180718_O_0492.JPG	2018-07-18 13:46:32	58.46408611	-135.93560278	217	Optimal	0	0	0	1	Good	LFT	2018-09-14	SO-2017.1	0
SO_C_20180718_O_0493.JPG	2018-07-18 13:46:33	58.46406944	-135.93641389	217	Optimal	0	0	0	1	Good	LFT	2018-09-14	SO-2017.1	0
SO_C_20180718_O_0494.JPG	2018-07-18 13:46:34	58.46405556	-135.93722778	217	Optimal	0	0	0	1	Good	LFT	2018-09-14	SO-2017.1	0
SO_C_20180718_O_0495.JPG	2018-07-18 13:46:35	58.46403889	-135.93804444	217	Optimal	0	0	0	1	Good	LFT	2018-09-14	SO-2017.1	0
SO_C_20180718_O_0496.JPG	2018-07-18 13:46:36	58.46401944	-135.93886111	217	Optimal	0	0	0	1	Good	LFT	2018-09-14	SO-2017.1	0
SO_C_20180718_O_0497.JPG	2018-07-18 13:46:37	58.46400278	-135.93967778	217	Optimal	0	0	0	1	Good	LFT	2018-09-14	SO-2017.1	0
SO_C_20180718_O_0498.JPG	2018-07-18 13:46:38	58.46398333	-135.94050000	217	Optimal	0	0	0	1	Good	LFT	2018-09-14	SO-2017.1	0
SO_C_20180718_O_0499.JPG	2018-07-18 13:46:39	58.46396667	-135.94132500	217	Optimal	0	0	0	1	Good	LFT	2018-09-14	SO-2017.1	0
SO_C_20180718_O_0500.JPG	2018-07-18 13:46:40	58.46395278	-135.94215000	217	Optimal	0	0	0	1	Good	LFT	2018-09-14	SO-2017.1	0
SO_C_20180718_O_0501.JPG	2018-07-18 13:46:41	58.46394167	-135.94297500	217	Optimal	0	0	0	1	Good	LFT	2018-09-14	SO-2017.1	0
SO_C_20180718_O_0502.JPG	2018-07-18 13:46:42	58.46393333	-135.94380278	217	Optimal	0	0	0	1	Good	LFT	2018-09-14	SO-2017.1	0
SO_C_20180718_O_0503.JPG	2018-07-18 13:46:43	58.46393056	-135.94463611	217	Optimal	0	0	0	1	Good	LFT	2018-09-14	SO-2017.1	0
SO_C_20180718_O_0504.JPG	2018-07-18 13:46:44	58.46392778	-135.94547222	217	Optimal	0	0	0	1	Good	LFT	2018-09-14	SO-2017.1	0
SO_C_20180718_O_0505.JPG	2018-07-18 13:46:45	58.46392778	-135.94630278	217	Optimal	0	0	0	1	Good	LFT	2018-09-14	SO-2017.1	0
SO_C_20180718_O_0506.JPG	2018-07-18 13:46:46	58.46392500	-135.94713611	217	Optimal	0	0	0	1	Good	LFT	2018-09-14	SO-2017.1	0
SO_C_20180718_O_0507.JPG	2018-07-18 13:46:47	58.46392778	-135.94796944	217	Optimal	0	0	0	1	Good	LFT	2018-09-14	SO-2017.1	0
SO_C_20180718_O_0508.JPG	2018-07-18 13:46:48	58.46393056	-135.94880278	217	Optimal	0	0	0	1	Good	LFT	2018-09-14	SO-2017.1	0
SO_C_20180718_O_0509.JPG	2018-07-18 13:46:49	58.46393333	-135.94963889	217	Optimal	0	0	0	1	Good	LFT	2018-09-14	SO-2017.1	0
SO_C_20180718_O_0510.JPG	2018-07-18 13:46:50	58.46393611	-135.95047778	217	Optimal	0	0	0	1	Good	LFT	2018-09-14	SO-2017.1	0
SO_C_20180718_O_0511.JPG	2018-07-18 13:46:51	58.46393889	-135.95131944	216	Optimal	0	0	0	1	Good	LFT	2018-09-14	SO-2017.1	0
SO_C_20180718_O_0512.JPG	2018-07-18 13:46:52	58.46393889	-135.95216111	216	Optimal	0	0	0	1	Good	LFT	2018-09-14	SO-2017.1	0
SO_C_20180718_O_0513.JPG	2018-07-18 13:46:53	58.46393611	-135.95300556	216	Optimal	0	0	0	1	Good	LFT	2018-09-14	SO-2017.1	0
SO_C_20180718_O_0515.JPG	2018-07-18 13:46:54	58.46393333	-135.95384722	215	Optimal	0	0	0	1	Good	LFT	2018-09-14	SO-2017.1	0
SO_C_20180718_O_0516.JPG	2018-07-18 13:46:55	58.46392778	-135.95468889	215	Optimal	0	0	0	1	Good	LFT	2018-09-14	SO-2017.1	0
SO_C_20180718_O_0517.JPG	2018-07-18 13:46:56	58.46392222	-135.95553056	214	Optimal	0	0	0	1	Good	LFT	2018-09-14	SO-2017.1	0
SO_C_20180718_O_0518.JPG	2018-07-18 13:46:57	58.46391944	-135.95637222	214	Optimal	0	0	1	1	Good	LFT	2018-09-14	SO-2017.1	0
SO_C_20180718_O_0519.JPG	2018-07-18 13:46:58	58.46391944	-135.95721111	214	Optimal	0	0	1	1	Good	LFT	2018-09-14	SO-2017.1	0
SO_C_20180718_O_0520.JPG	2018-07-18 13:46:59	58.46392222	-135.95805278	214	Optimal	0	0	0	1	Good	LFT	2018-09-14	SO-2017.1	0
SO_C_20180718_O_0521.JPG	2018-07-18 13:47:00	58.46392500	-135.95889722	213	Optimal	0	0	0	1	Good	LFT	2018-09-14	SO-2017.1	0
SO_C_20180718_O_0522.JPG	2018-07-18 13:47:01	58.46393333	-135.95974722	213	Optimal	0	0	0	1	Good	LFT	2018-09-14	SO-2017.1	0
SO_C_20180718_O_0523.JPG	2018-07-18 13:47:02	58.46393611	-135.96059167	212	Optimal	0	0	0	1	Good	LFT	2018-09-14	SO-2017.1	0
SO_C_20180718_O_0524.JPG	2018-07-18 13:47:03	58.46393611	-135.96143333	211	Optimal	0	0	0	1	Good	LFT	2018-09-14	SO-2017.1	0
SO_C_20180718_O_0525.JPG	2018-07-18 13:47:04	58.46393333	-135.96227500	210	Optimal	0	0	0	1	Good	LFT	2018-09-14	SO-2017.1	0
SO_C_20180718_O_0526.JPG	2018-07-18 13:47:05	58.46392778	-135.96311389	209	Optimal	0	0	0	1	Good	LFT	2018-09-14	SO-2017.1	0
SO_C_20180718_O_0527.JPG	2018-07-18 13:47:06	58.46391944	-135.96394722	208	Optimal	0	0	0	1	Good	LFT	2018-09-14	SO-2017.1	0
SO_C_20180718_O_0528.JPG	2018-07-18 13:47:07	58.46391111	-135.96477500	207	Optimal	0	0	0	1	Good	LFT	2018-09-14	SO-2017.1	0
SO_C_20180718_O_0529.JPG	2018-07-18 13:47:08	58.46390278	-135.96560000	206	Optimal	0	0	0	1	Good	LFT	2018-09-14	SO-2017.1	0
SO_C_20180718_O_0530.JPG	2018-07-18 13:47:09	58.46389444	-135.96642222	206	Optimal	0	0	0	1	Good	LFT	2018-09-14	SO-2017.1	0
SO_C_20180718_O_0531.JPG	2018-07-18 13:47:10	58.46388333	-135.96723889	206	Optimal	0	0	0	1	Good	LFT	2018-09-14	SO-2017.1	0
SO_C_20180718_O_0532.JPG	2018-07-18 13:47:11	58.46387500	-135.96805556	206	Optimal	0	0	0	1	Good	LFT	2018-09-14	SO-2017.1	0
SO_C_20180718_O_0533.JPG	2018-07-18 13:47:12	58.46386944	-135.96886667	206	Optimal	0	0	0	1	Good	LFT	2018-09-14	SO-2017.1	0
SO_C_20180718_O_0534.JPG	2018-07-18 13:47:13	58.46386389	-135.96967778	207	Optimal	0	0	0	1	Good	LFT	2018-09-14	SO-2017.1	0
SO_C_20180718_O_0535.JPG	2018-07-18 13:47:14	58.46386111	-135.97048889	208	Optimal	0	0	0	1	Good	LFT	2018-09-14	SO-2017.1	0
SO_C_20180718_O_0536.JPG	2018-07-18 13:47:15	58.46385556	-135.97130000	208	Optimal	0	0	0	1	Good	LFT	2018-09-14	SO-2017.1	0
SO_C_20180718_O_0537.JPG	2018-07-18 13:47:16	58.46385278	-135.97211667	208	Optimal	0	0	0	1	Good	LFT	2018-09-14	SO-2017.1	0
SO_C_20180718_O_0538.JPG	2018-07-18 13:47:17	58.46384722	-135.97293611	209	Optimal	0	0	0	1	Good	LFT	2018-09-14	SO-2017.1	0
SO_C_20180718_O_0539.JPG	2018-07-18 13:47:18	58.46384722	-135.97375833	209	Optimal	0	0	0	1	Good	LFT	2018-09-14	SO-2017.1	0
SO_C_20180718_O_0540.JPG	2018-07-18 13:47:19	58.46384444	-135.97458333	209	Optimal	0	0	0	1	Good	LFT	2018-09-14	SO-2017.1	0
SO_C_20180718_O_0541.JPG	2018-07-18 13:47:20	58.46384444	-135.97540556	208	Optimal	0	0	0	1	Good	LFT	2018-09-14	SO-2017.1	0
SO_C_20180718_O_0542.JPG	2018-07-18 13:47:21	58.46384444	-135.97622778	208	Optimal	0	0	0	1	Good	LFT	2018-09-14	SO-2017.1	0
SO_C_20180718_O_0543.JPG	2018-07-18 13:47:22	58.46384444	-135.97704722	207	Optimal	0	0	0	1	Good	LFT	2018-09-14	SO-2017.1	0
SO_C_20180718_O_0544.JPG	2018-07-18 13:47:23	58.46384722	-135.97786667	207	Optimal	0	0	0	1	Good	LFT	2018-09-14	SO-2017.1	0
SO_C_20180718_O_0545.JPG	2018-07-18 13:47:24	58.46384444	-135.97868056	206	Optimal	0	0	0	1	Good	LFT	2018-09-14	SO-2017.1	0
SO_C_20180718_O_0546.JPG	2018-07-18 13:47:25	58.46384167	-135.97949167	206	Optimal	0	0	0	1	Good	LFT	2018-09-14	SO-2017.1	0
SO_C_20180718_O_0547.JPG	2018-07-18 13:47:26	58.46383611	-135.98030000	206	Optimal	0	0	0	1	Good	LFT	2018-09-14	SO-2017.1	0
SO_C_20180718_O_0548.JPG	2018-07-18 13:47:27	58.46383056	-135.98110556	206	Optimal	0	0	0	1	Good	LFT	2018-09-14	SO-2017.1	0
SO_C_20180718_O_0549.JPG	2018-07-18 13:47:28	58.46382222	-135.98190556	206	Optimal	0	0	0	1	Good	LFT	2018-09-14	SO-2017.1	0
SO_C_20180718_O_0550.JPG	2018-07-18 13:47:29	58.46381389	-135.98270556	206	Optimal	0	0	0	1	Good	LFT	2018-09-14	SO-2017.1	0
SO_C_20180718_O_0551.JPG	2018-07-18 13:47:31	58.46379444	-135.98429722	207	Optimal	0	0	0	1	Good	LFT	2018-09-14	SO-2017.1	0
SO_C_20180718_O_0552.JPG	2018-07-18 13:47:32	58.46378333	-135.98509722	207	Optimal	0	0	0	1	Good	LFT	2018-09-14	SO-2017.1	0
SO_C_20180718_O_0553.JPG	2018-07-18 13:47:33	58.46377222	-135.98589722	208	Optimal	0	0	0	1	Good	LFT	2018-09-14	SO-2017.1	0
SO_C_20180718_O_0554.JPG	2018-07-18 13:47:34	58.46376389	-135.98670000	208	Optimal	0	0	0	1	Good	LFT	2018-09-14	SO-2017.1	0
SO_C_20180718_O_0555.JPG	2018-07-18 13:47:35	58.46375556	-135.98750556	209	Optimal	0	0	1	1	Good	LFT	2018-09-14	SO-2017.1	0
SO_C_20180718_O_0556.JPG	2018-07-18 13:47:36	58.46374722	-135.98831111	209	Optimal	0	0	1	1	Good	LFT	2018-09-14	SO-2017.1	0
SO_C_20180718_O_0557.JPG	2018-07-18 13:47:37	58.46374167	-135.98911944	209	Optimal	0	0	1	1	Good	LFT	2018-09-14	SO-2017.1	0
SO_C_20180718_O_0558.JPG	2018-07-18 13:47:38	58.46373056	-135.98992778	209	Optimal	0	0	1	1	Good	LFT	2018-09-14	SO-2017.1	0
SO_C_20180718_O_0559.JPG	2018-07-18 13:47:39	58.46372222	-135.99073611	210	Optimal	0	0	1	0	Good	LFT	2018-09-14	SO-2017.1	0
SO_C_20180718_O_0560.JPG	2018-07-18 13:47:40	58.46371389	-135.99154722	210	Optimal	0	0	0	0	Good	LFT	2018-09-14	SO-2017.1	0
SO_C_20180718_O_0561.JPG	2018-07-18 13:47:41	58.46370556	-135.99235556	210	Optimal	0	0	0	0	Good	LFT	2018-09-14	SO-2017.1	0
SO_C_20180718_O_0562.JPG	2018-07-18 13:47:42	58.46369722	-135.99316667	210	Optimal	0	0	1	0	Good	LFT	2018-09-14	SO-2017.1	0
SO_C_20180718_O_0563.JPG	2018-07-18 13:47:43	58.46368889	-135.99397778	210	Optimal	0	0	1	0	Good	LFT	2018-09-14	SO-2017.1	0
SO_C_20180718_O_0564.JPG	2018-07-18 13:47:44	58.46368056	-135.99478889	210	Optimal	0	0	0	0	Good	LFT	2018-09-14	SO-2017.1	0
SO_C_20180718_O_0565.JPG	2018-07-18 13:47:45	58.46366944	-135.99559722	210	Optimal	0	0	0	0	Good	LFT	2018-09-14	SO-2017.1	0
SO_C_20180718_O_0566.JPG	2018-07-18 13:47:46	58.46365833	-135.99640556	210	Optimal	0	0	0	0	Good	LFT	2018-09-14	SO-2017.1	0
SO_C_20180718_O_0567.JPG	2018-07-18 13:47:47	58.46364722	-135.99721111	210	Optimal	0	0	0	0	Good	LFT	2018-09-14	SO-2017.1	0
SO_C_20180718_O_0568.JPG	2018-07-18 13:47:48	58.46363611	-135.99801667	210	Optimal	0	0	0	0	Good	LFT	2018-09-14	SO-2017.1	0
SO_C_20180718_O_0569.JPG	2018-07-18 13:47:49	58.46362778	-135.99881667	210	Optimal	0	0	0	0	Good	LFT	2018-09-14	SO-2017.1	0
SO_C_20180718_O_0570.JPG	2018-07-18 13:47:50	58.46361944	-135.99961944	210	Optimal	0	0	0	0	Good	LFT	2018-09-14	SO-2017.1	0
SO_C_20180718_O_0571.JPG	2018-07-18 13:47:51	58.46361389	-136.00041667	211	Optimal	0	0	0	0	Good	LFT	2018-09-14	SO-2017.1	0
SO_C_20180718_O_0572.JPG	2018-07-18 13:47:52	58.46360833	-136.00121389	211	Optimal	0	0	0	0	Good	LFT	2018-09-14	SO-2017.1	0
SO_C_20180718_O_0573.JPG	2018-07-18 13:47:53	58.46360000	-136.00200833	211	Optimal	0	0	0	0	Good	LFT	2018-09-14	SO-2017.1	0
SO_C_20180718_O_0574.JPG	2018-07-18 13:47:54	58.46359167	-136.00280000	212	Optimal	0	0	0	0	Good	LFT	2018-09-14	SO-2017.1	0
SO_C_20180718_O_0575.JPG	2018-07-18 13:47:55	58.46358611	-136.00359167	212	Optimal	0	0	0	0	Good	LFT	2018-09-14	SO-2017.1	0
SO_C_20180718_O_0576.JPG	2018-07-18 13:47:56	58.46358056	-136.00438611	212	Optimal	0	0	0	0	Good	LFT	2018-09-14	SO-2017.1	0
SO_C_20180718_O_0577.JPG	2018-07-18 13:47:57	58.46358056	-136.00518333	213	Optimal	0	0	0	0	Good	LFT	2018-09-14	SO-2017.1	0
SO_C_20180718_O_0578.JPG	2018-07-18 13:47:58	58.46358056	-136.00598056	213	Optimal	0	0	0	0	Good	LFT	2018-09-14	SO-2017.1	0
SO_C_20180718_O_0579.JPG	2018-07-18 13:47:59	58.46358056	-136.00677778	214	Optimal	0	0	0	0	Good	LFT	2018-09-14	SO-2017.1	0
SO_C_20180718_O_0580.JPG	2018-07-18 13:48:00	58.46358333	-136.00757500	214	Optimal	0	0	0	0	Good	LFT	2018-09-14	SO-2017.1	0
SO_C_20180718_O_0581.JPG	2018-07-18 13:48:01	58.46358889	-136.00837500	214	Optimal	0	0	0	0	Good	LFT	2018-09-14	SO-2017.1	0
SO_C_20180718_O_0582.JPG	2018-07-18 13:48:02	58.46358889	-136.00917500	214	Optimal	0	0	0	0	Good	LFT	2018-09-14	SO-2017.1	0
SO_C_20180718_O_0583.JPG	2018-07-18 13:48:03	58.46359167	-136.00997500	214	Optimal	0	0	0	0	Good	LFT	2018-09-14	SO-2017.1	0
SO_C_20180718_O_0584.JPG	2018-07-18 13:48:04	58.46358611	-136.01078056	214	Optimal	0	0	0	0	Good	LFT	2018-09-14	SO-2017.1	0
SO_C_20180718_O_0585.JPG	2018-07-18 13:48:05	58.46358056	-136.01158611	214	Optimal	0	0	0	0	Good	LFT	2018-09-14	SO-2017.1	0
SO_C_20180718_O_0586.JPG	2018-07-18 13:48:06	58.46357222	-136.01239167	214	Optimal	0	0	0	0	Good	LFT	2018-09-14	SO-2017.1	0
SO_C_20180718_O_0587.JPG	2018-07-18 13:48:07	58.46355833	-136.01319722	214	Optimal	0	0	1	0	Good	LFT	2018-09-14	SO-2017.1	0
SO_C_20180718_O_0588.JPG	2018-07-18 13:48:08	58.46354167	-136.01400833	214	Optimal	0	0	0	0	Good	LFT	2018-09-14	SO-2017.1	0
SO_C_20180718_O_0589.JPG	2018-07-18 13:48:09	58.46351944	-136.01481389	214	Optimal	0	0	0	0	Good	LFT	2018-09-14	SO-2017.1	0
SO_C_20180718_O_0590.JPG	2018-07-18 13:48:10	58.46349722	-136.01562222	213	Optimal	0	0	0	0	Good	LFT	2018-09-14	SO-2017.1	0
SO_C_20180718_O_0591.JPG	2018-07-18 13:48:11	58.46348056	-136.01643611	213	Optimal	0	0	0	0	Good	LFT	2018-09-14	SO-2017.1	0
SO_C_20180718_O_0592.JPG	2018-07-18 13:48:12	58.46346389	-136.01724722	213	Optimal	0	0	0	0	Good	LFT	2018-09-14	SO-2017.1	0
SO_C_20180718_O_0593.JPG	2018-07-18 13:48:13	58.46345000	-136.01806111	213	Optimal	0	0	0	0	Good	LFT	2018-09-14	SO-2017.1	0
SO_C_20180718_O_0594.JPG	2018-07-18 13:48:14	58.46343889	-136.01887500	213	Optimal	0	0	0	0	Good	LFT	2018-09-14	SO-2017.1	0
SO_C_20180718_O_0595.JPG	2018-07-18 13:48:15	58.46342222	-136.01968333	213	Optimal	0	0	0	0	Good	LFT	2018-09-14	SO-2017.1	0
SO_C_20180718_O_0596.JPG	2018-07-18 13:48:16	58.46340833	-136.02049722	213	Optimal	0	0	1	0	Good	LFT	2018-09-14	SO-2017.1	0
SO_C_20180718_O_0597.JPG	2018-07-18 13:48:17	58.46339722	-136.02130833	213	Optimal	0	0	0	0	Good	LFT	2018-09-14	SO-2017.1	0
SO_C_20180718_O_0598.JPG	2018-07-18 13:48:18	58.46338611	-136.02212222	213	Optimal	0	0	0	0	Good	LFT	2018-09-14	SO-2017.1	0
SO_C_20180718_O_0599.JPG	2018-07-18 13:48:19	58.46337500	-136.02293611	213	Optimal	0	0	1	0	Good	LFT	2018-09-14	SO-2017.1	0
SO_C_20180718_O_0600.JPG	2018-07-18 13:48:20	58.46336667	-136.02375000	213	Optimal	0	0	1	0	Good	LFT	2018-09-14	SO-2017.1	0
SO_C_20180718_O_0601.JPG	2018-07-18 13:48:21	58.46336111	-136.02456111	213	Optimal	0	0	1	0	Good	LFT	2018-09-14	SO-2017.1	0
SO_C_20180718_O_0602.JPG	2018-07-18 13:48:22	58.46336389	-136.02537778	213	Optimal	0	0	0	0	Good	LFT	2018-09-14	SO-2017.1	0
SO_C_20180718_O_0603.JPG	2018-07-18 13:48:23	58.46336389	-136.02619444	213	Optimal	0	0	0	0	Good	LFT	2018-09-14	SO-2017.1	0
SO_C_20180718_O_0604.JPG	2018-07-18 13:48:24	58.46336111	-136.02700833	213	Optimal	0	0	0	0	Good	LFT	2018-09-14	SO-2017.1	0
SO_C_20180718_O_0605.JPG	2018-07-18 13:48:25	58.46336111	-136.02782778	213	Optimal	0	0	0	0	Good	LFT	2018-09-14	SO-2017.1	0
SO_C_20180718_O_0606.JPG	2018-07-18 13:48:26	58.46336389	-136.02864444	213	Optimal	0	0	0	0	Good	LFT	2018-09-14	SO-2017.1	0
SO_C_20180718_O_0607.JPG	2018-07-18 13:48:27	58.46336667	-136.02946111	213	Optimal	0	0	0	0	Good	LFT	2018-09-14	SO-2017.1	0
SO_C_20180718_O_0608.JPG	2018-07-18 13:48:28	58.46336667	-136.03027778	213	Optimal	0	0	0	0	Good	LFT	2018-09-14	SO-2017.1	0
SO_C_20180718_O_0609.JPG	2018-07-18 13:48:29	58.46336944	-136.03109444	213	Optimal	0	0	0	0	Good	LFT	2018-09-14	SO-2017.1	0
SO_C_20180718_O_0610.JPG	2018-07-18 13:48:30	58.46337222	-136.03190833	213	Optimal	0	0	0	0	Good	LFT	2018-09-14	SO-2017.1	0
SO_C_20180718_O_0611.JPG	2018-07-18 13:48:31	58.46337500	-136.03272778	213	Optimal	0	0	0	0	Good	LFT	2018-09-14	SO-2017.1	0
SO_C_20180718_O_0612.JPG	2018-07-18 13:48:32	58.46337222	-136.03353889	212	Optimal	0	0	0	0	Good	LFT	2018-09-14	SO-2017.1	0
SO_C_20180718_O_0613.JPG	2018-07-18 13:48:33	58.46336944	-136.03434722	212	Optimal	0	0	0	0	Good	LFT	2018-09-14	SO-2017.1	0
SO_C_20180718_O_0614.JPG	2018-07-18 13:48:34	58.46336944	-136.03515278	213	Optimal	0	0	0	0	Good	LFT	2018-09-14	SO-2017.1	0
SO_C_20180718_O_0615.JPG	2018-07-18 13:48:35	58.46336944	-136.03596389	213	Optimal	0	0	0	0	Good	LFT	2018-09-14	SO-2017.1	0
SO_C_20180718_O_0616.JPG	2018-07-18 13:48:36	58.46337500	-136.03676389	213	Optimal	0	0	0	0	Good	LFT	2018-09-14	SO-2017.1	0
SO_C_20180718_O_0617.JPG	2018-07-18 13:48:37	58.46337500	-136.03756667	213	Optimal	0	0	0	0	Good	LFT	2018-09-14	SO-2017.1	0
SO_C_20180718_O_0618.JPG	2018-07-18 13:48:38	58.46337500	-136.03836944	214	Optimal	0	0	0	0	Good	LFT	2018-09-14	SO-2017.1	0
SO_C_20180718_O_0619.JPG	2018-07-18 13:48:39	58.46338333	-136.03916944	214	Optimal	0	0	0	0	Good	LFT	2018-09-14	SO-2017.1	0
SO_C_20180718_O_0620.JPG	2018-07-18 13:48:40	58.46338611	-136.03997222	215	Optimal	0	0	0	0	Good	LFT	2018-09-14	SO-2017.1	0
SO_C_20180718_O_0621.JPG	2018-07-18 13:48:41	58.46339167	-136.04077778	215	Optimal	0	0	0	0	Good	LFT	2018-09-14	SO-2017.1	0
SO_C_20180718_O_0622.JPG	2018-07-18 13:48:42	58.46339444	-136.04158333	215	Optimal	0	0	0	0	Good	LFT	2018-09-14	SO-2017.1	0
SO_C_20180718_O_0623.JPG	2018-07-18 13:48:43	58.46339444	-136.04239722	215	Optimal	0	0	0	0	Good	LFT	2018-09-14	SO-2017.1	0
SO_C_20180718_O_0624.JPG	2018-07-18 13:48:44	58.46339167	-136.04320833	215	Optimal	0	0	0	0	Good	LFT	2018-09-14	SO-2017.1	0
SO_C_20180718_O_0625.JPG	2018-07-18 13:48:45	58.46338611	-136.04402500	215	Optimal	0	0	0	0	Good	LFT	2018-09-14	SO-2017.1	0
SO_C_20180718_O_0626.JPG	2018-07-18 13:48:46	58.46337778	-136.04484444	215	Optimal	0	0	0	0	Good	LFT	2018-09-14	SO-2017.1	0
SO_C_20180718_O_0627.JPG	2018-07-18 13:48:47	58.46336389	-136.04566389	215	Optimal	0	0	0	0	Good	LFT	2018-09-14	SO-2017.1	0
SO_C_20180718_O_0628.JPG	2018-07-18 13:48:48	58.46334722	-136.04648333	214	Optimal	0	0	0	0	Good	LFT	2018-09-14	SO-2017.1	0
SO_C_20180718_O_0629.JPG	2018-07-18 13:48:49	58.46332778	-136.04730278	214	Optimal	0	0	0	0	Good	LFT	2018-09-14	SO-2017.1	0
SO_C_20180718_O_0630.JPG	2018-07-18 13:48:50	58.46331111	-136.04812778	213	Optimal	0	0	0	0	Good	LFT	2018-09-14	SO-2017.1	0
SO_C_20180718_O_0631.JPG	2018-07-18 13:48:51	58.46328889	-136.04894722	213	Optimal	0	0	0	0	Good	LFT	2018-09-14	SO-2017.1	0
SO_C_20180718_O_0632.JPG	2018-07-18 13:48:52	58.46327222	-136.04977222	212	Optimal	0	0	0	0	Good	LFT	2018-09-14	SO-2017.1	0
SO_C_20180718_O_0633.JPG	2018-07-18 13:48:53	58.46325278	-136.05060000	212	Optimal	0	0	0	0	Good	LFT	2018-09-14	SO-2017.1	0
SO_C_20180718_O_0634.JPG	2018-07-18 13:48:54	58.46323333	-136.05142500	212	Optimal	0	0	0	0	Good	LFT	2018-09-14	SO-2017.1	0
SO_C_20180718_O_0635.JPG	2018-07-18 13:48:55	58.46321111	-136.05224722	212	Optimal	0	0	0	0	Good	LFT	2018-09-14	SO-2017.1	0
SO_C_20180718_O_0636.JPG	2018-07-18 13:48:56	58.46319167	-136.05306944	212	Optimal	0	0	0	0	Good	LFT	2018-09-14	SO-2017.1	0
SO_C_20180718_O_0637.JPG	2018-07-18 13:48:57	58.46317778	-136.05389722	212	Optimal	0	0	0	0	Good	LFT	2018-09-14	SO-2017.1	0
SO_C_20180718_O_0638.JPG	2018-07-18 13:48:58	58.46316667	-136.05472222	212	Optimal	0	0	0	0	Good	LFT	2018-09-14	SO-2017.1	0
SO_C_20180718_O_0639.JPG	2018-07-18 13:48:59	58.46315833	-136.05555278	212	Optimal	0	0	0	0	Good	LFT	2018-09-14	SO-2017.1	0
SO_C_20180718_O_0640.JPG	2018-07-18 13:49:00	58.46315278	-136.05638333	212	Optimal	0	0	0	0	Good	LFT	2018-09-14	SO-2017.1	0
SO_C_20180718_O_0641.JPG	2018-07-18 13:49:01	58.46314444	-136.05721389	212	Optimal	0	0	0	0	Good	LFT	2018-09-14	SO-2017.1	0
SO_C_20180718_O_0642.JPG	2018-07-18 13:49:02	58.46313889	-136.05804444	211	Optimal	0	0	0	0	Good	LFT	2018-09-14	SO-2017.1	0
SO_C_20180718_O_0643.JPG	2018-07-18 13:49:03	58.46313611	-136.05887778	211	Optimal	0	0	0	0	Good	LFT	2018-09-14	SO-2017.1	0
SO_C_20180718_O_0644.JPG	2018-07-18 13:49:04	58.46313333	-136.05970833	211	Optimal	0	0	0	0	Good	LFT	2018-09-14	SO-2017.1	0
SO_C_20180718_O_0645.JPG	2018-07-18 13:49:05	58.46313333	-136.06053611	211	Optimal	0	0	0	0	Good	LFT	2018-09-14	SO-2017.1	0
SO_C_20180718_O_0646.JPG	2018-07-18 13:49:06	58.46313889	-136.06135833	211	Optimal	0	0	0	0	Good	LFT	2018-09-14	SO-2017.1	0
SO_C_20180718_O_0647.JPG	2018-07-18 13:49:07	58.46313611	-136.06218611	211	Optimal	0	0	0	0	Good	LFT	2018-09-14	SO-2017.1	0
SO_C_20180718_O_0648.JPG	2018-07-18 13:49:08	58.46313889	-136.06301111	210	Optimal	0	0	0	0	Good	LFT	2018-09-14	SO-2017.1	0
SO_C_20180718_O_0649.JPG	2018-07-18 13:49:09	58.46313889	-136.06383333	210	Optimal	0	0	0	0	Good	LFT	2018-09-14	SO-2017.1	0
SO_C_20180718_O_0650.JPG	2018-07-18 13:49:10	58.46313889	-136.06465278	210	Optimal	0	0	0	0	Good	LFT	2018-09-14	SO-2017.1	0
SO_C_20180718_O_0651.JPG	2018-07-18 13:49:11	58.46313611	-136.06547778	210	Optimal	0	0	0	0	Good	LFT	2018-09-14	SO-2017.1	0
SO_C_20180718_O_0652.JPG	2018-07-18 13:49:12	58.46313333	-136.06630000	210	Optimal	0	0	0	0	Good	LFT	2018-09-14	SO-2017.1	0
SO_C_20180718_O_0653.JPG	2018-07-18 13:49:13	58.46313611	-136.06711667	211	Optimal	0	0	1	0	Good	LFT	2018-09-14	SO-2017.1	0
SO_C_20180718_O_0654.JPG	2018-07-18 13:49:14	58.46313611	-136.06793611	211	Optimal	0	0	0	0	Good	LFT	2018-09-14	SO-2017.1	0
SO_C_20180718_O_0655.JPG	2018-07-18 13:49:15	58.46313333	-136.06875556	211	Optimal	0	0	0	0	Good	LFT	2018-09-14	SO-2017.1	0
SO_C_20180718_O_0656.JPG	2018-07-18 13:49:16	58.46313333	-136.06956944	211	Optimal	0	0	0	0	Good	LFT	2018-09-14	SO-2017.1	0
SO_C_20180718_O_0657.JPG	2018-07-18 13:49:17	58.46313611	-136.07038333	211	Optimal	0	0	1	0	Good	LFT	2018-09-14	SO-2017.1	0
SO_C_20180718_O_0658.JPG	2018-07-18 13:49:18	58.46313889	-136.07119444	211	Optimal	0	0	1	1	Good	LFT	2018-09-14	SO-2017.1	0
SO_C_20180718_O_0659.JPG	2018-07-18 13:49:19	58.46313889	-136.07200278	211	Optimal	0	0	1	1	Good	LFT	2018-09-14	SO-2017.1	0
SO_C_20180718_O_0660.JPG	2018-07-18 13:49:20	58.46313889	-136.07281111	211	Optimal	0	0	1	1	Good	LFT	2018-09-14	SO-2017.1	0
SO_C_20180718_O_0661.JPG	2018-07-18 13:49:21	58.46313333	-136.07361389	212	Optimal	0	0	0	1	Good	LFT	2018-09-14	SO-2017.1	0
SO_C_20180718_O_0662.JPG	2018-07-18 13:49:22	58.46312778	-136.07441667	212	Optimal	0	0	0	1	Good	LFT	2018-09-14	SO-2017.1	0
SO_C_20180718_O_0663.JPG	2018-07-18 13:49:23	58.46311667	-136.07521667	212	Optimal	0	0	0	1	Good	LFT	2018-09-14	SO-2017.1	0
SO_C_20180718_O_0664.JPG	2018-07-18 13:49:24	58.46310000	-136.07601389	213	Optimal	0	0	0	1	Good	LFT	2018-09-14	SO-2017.1	0
SO_C_20180718_O_0665.JPG	2018-07-18 13:51:28	58.48830556	-136.11396111	218	Optimal	0	0	0	1	Good	LFT	2018-09-14	SO-2017.1	0
SO_C_20180718_O_0666.JPG	2018-07-18 13:51:29	58.48827778	-136.11312500	217	Optimal	0	0	0	1	Good	LFT	2018-09-14	SO-2017.1	0
SO_C_20180718_O_0667.JPG	2018-07-18 13:51:30	58.48824167	-136.11229444	216	Optimal	0	0	0	1	Good	LFT	2018-09-14	SO-2017.1	0
SO_C_20180718_O_0668.JPG	2018-07-18 13:51:31	58.48820278	-136.11147222	215	Optimal	0	0	0	1	Good	LFT	2018-09-14	SO-2017.1	0
SO_C_20180718_O_0669.JPG	2018-07-18 13:51:32	58.48816111	-136.11065833	214	Optimal	0	0	0	1	Good	LFT	2018-09-14	SO-2017.1	0
SO_C_20180718_O_0670.JPG	2018-07-18 13:51:33	58.48811389	-136.10985556	212	Optimal	0	0	0	1	Good	LFT	2018-09-14	SO-2017.1	0
SO_C_20180718_O_0671.JPG	2018-07-18 13:51:34	58.48806389	-136.10906111	212	Optimal	0	0	0	1	Good	LFT	2018-09-14	SO-2017.1	0
SO_C_20180718_O_0672.JPG	2018-07-18 13:51:35	58.48801111	-136.10826944	212	Optimal	0	0	0	1	Good	LFT	2018-09-14	SO-2017.1	0
SO_C_20180718_O_0673.JPG	2018-07-18 13:51:36	58.48796111	-136.10748056	212	Optimal	0	0	0	1	Good	LFT	2018-09-14	SO-2017.1	0
SO_C_20180718_O_0674.JPG	2018-07-18 13:51:37	58.48791389	-136.10669167	212	Optimal	0	0	0	1	Good	LFT	2018-09-14	SO-2017.1	0
SO_C_20180718_O_0675.JPG	2018-07-18 13:51:38	58.48786944	-136.10590278	213	Optimal	0	0	0	1	Good	LFT	2018-09-14	SO-2017.1	0
SO_C_20180718_O_0676.JPG	2018-07-18 13:51:39	58.48783333	-136.10511389	215	Optimal	0	0	0	1	Good	LFT	2018-09-14	SO-2017.1	0
SO_C_20180718_O_0677.JPG	2018-07-18 13:51:40	58.48780000	-136.10432222	215	Optimal	0	0	0	1	Good	LFT	2018-09-14	SO-2017.1	0
SO_C_20180718_O_0678.JPG	2018-07-18 13:51:41	58.48777222	-136.10352500	216	Optimal	0	0	0	1	Good	LFT	2018-09-14	SO-2017.1	0
SO_C_20180718_O_0679.JPG	2018-07-18 13:51:42	58.48775278	-136.10272222	217	Optimal	0	0	1	1	Good	LFT	2018-09-14	SO-2017.1	0
SO_C_20180718_O_0680.JPG	2018-07-18 13:51:43	58.48773611	-136.10191389	218	Optimal	0	0	1	1	Good	LFT	2018-09-14	SO-2017.1	0
SO_C_20180718_O_0681.JPG	2018-07-18 13:51:44	58.48772778	-136.10110000	219	Optimal	0	0	1	0	Good	LFT	2018-09-14	SO-2017.1	0
SO_C_20180718_O_0682.JPG	2018-07-18 13:51:45	58.48772500	-136.10028056	219	Optimal	0	0	0	0	Good	LFT	2018-09-14	SO-2017.1	0
SO_C_20180718_O_0683.JPG	2018-07-18 13:51:46	58.48773056	-136.09946111	219	Optimal	0	0	0	0	Good	LFT	2018-09-14	SO-2017.1	0
SO_C_20180718_O_0684.JPG	2018-07-18 13:51:47	58.48774167	-136.09863611	219	Optimal	0	0	1	0	Good	LFT	2018-09-14	SO-2017.1	0
SO_C_20180718_O_0685.JPG	2018-07-18 13:51:48	58.48775833	-136.09781389	219	Optimal	0	0	1	0	Good	LFT	2018-09-14	SO-2017.1	0
SO_C_20180718_O_0686.JPG	2018-07-18 13:51:49	58.48777778	-136.09699167	219	Optimal	0	0	0	0	Good	LFT	2018-09-14	SO-2017.1	0
SO_C_20180718_O_0687.JPG	2018-07-18 13:51:50	58.48780278	-136.09616667	218	Optimal	0	0	0	0	Good	LFT	2018-09-14	SO-2017.1	0
SO_C_20180718_O_0688.JPG	2018-07-18 13:51:51	58.48782778	-136.09534722	217	Optimal	0	0	0	0	Good	LFT	2018-09-14	SO-2017.1	0
SO_C_20180718_O_0689.JPG	2018-07-18 13:51:52	58.48785000	-136.09452778	216	Optimal	0	0	0	0	Good	LFT	2018-09-14	SO-2017.1	0
SO_C_20180718_O_0690.JPG	2018-07-18 13:51:53	58.48787500	-136.09370556	215	Optimal	0	0	0	0	Good	LFT	2018-09-14	SO-2017.1	0
SO_C_20180718_O_0691.JPG	2018-07-18 13:51:54	58.48789722	-136.09288056	215	Optimal	0	0	0	0	Good	LFT	2018-09-14	SO-2017.1	0
SO_C_20180718_O_0692.JPG	2018-07-18 13:51:55	58.48791944	-136.09205556	214	Optimal	0	0	0	0	Good	LFT	2018-09-14	SO-2017.1	0
SO_C_20180718_O_0693.JPG	2018-07-18 13:51:56	58.48794167	-136.09123056	214	Optimal	0	0	0	0	Good	LFT	2018-09-14	SO-2017.1	0
SO_C_20180718_O_0694.JPG	2018-07-18 13:51:57	58.48796111	-136.09040278	214	Optimal	0	0	1	0	Good	LFT	2018-09-14	SO-2017.1	0
SO_C_20180718_O_0695.JPG	2018-07-18 13:51:58	58.48798056	-136.08957500	214	Optimal	0	0	0	0	Good	LFT	2018-09-14	SO-2017.1	0
SO_C_20180718_O_0696.JPG	2018-07-18 13:51:59	58.48799722	-136.08874444	215	Optimal	0	0	0	0	Good	LFT	2018-09-14	SO-2017.1	0
SO_C_20180718_O_0697.JPG	2018-07-18 13:52:00	58.48800556	-136.08791111	215	Optimal	0	0	0	0	Good	LFT	2018-09-14	SO-2017.1	0
SO_C_20180718_O_0698.JPG	2018-07-18 13:52:01	58.48801389	-136.08707222	215	Optimal	2	0	0	0	Good	LFT	2018-09-14	SO-2017.1	0
SO_C_20180718_O_0699.JPG	2018-07-18 13:52:02	58.48801667	-136.08623333	215	Optimal	0	0	0	0	Good	LFT	2018-09-14	SO-2017.1	0
SO_C_20180718_O_0700.JPG	2018-07-18 13:52:03	58.48801944	-136.08538889	215	Optimal	0	0	0	0	Good	LFT	2018-09-14	SO-2017.1	0
SO_C_20180718_O_0701.JPG	2018-07-18 13:52:04	58.48801667	-136.08454722	215	Optimal	0	0	0	0	Good	LFT	2018-09-14	SO-2017.1	0
SO_C_20180718_O_0702.JPG	2018-07-18 13:52:05	58.48801667	-136.08370556	214	Optimal	0	0	0	0	Good	LFT	2018-09-14	SO-2017.1	0
SO_C_20180718_O_0703.JPG	2018-07-18 13:52:06	58.48801389	-136.08286389	214	Optimal	0	0	1	0	Good	LFT	2018-09-14	SO-2017.1	0
SO_C_20180718_O_0704.JPG	2018-07-18 13:52:07	58.48800833	-136.08202500	213	Optimal	0	0	0	0	Good	LFT	2018-09-14	SO-2017.1	0
SO_C_20180718_O_0705.JPG	2018-07-18 13:52:08	58.48800278	-136.08118333	213	Optimal	0	0	0	0	Good	LFT	2018-09-14	SO-2017.1	0
SO_C_20180718_O_0706.JPG	2018-07-18 13:52:09	58.48799722	-136.08035000	213	Optimal	0	0	0	0	Good	LFT	2018-09-14	SO-2017.1	0
SO_C_20180718_O_0707.JPG	2018-07-18 13:52:10	58.48799444	-136.07951667	212	Optimal	0	0	0	0	Good	LFT	2018-09-14	SO-2017.1	0
SO_C_20180718_O_0708.JPG	2018-07-18 13:52:11	58.48799444	-136.07868889	212	Optimal	0	0	0	0	Good	LFT	2018-09-14	SO-2017.1	0
SO_C_20180718_O_0709.JPG	2018-07-18 13:52:12	58.48799167	-136.07786389	211	Optimal	0	0	0	0	Good	LFT	2018-09-14	SO-2017.1	0
SO_C_20180718_O_0710.JPG	2018-07-18 13:52:13	58.48799722	-136.07704722	211	Optimal	0	0	0	0	Good	LFT	2018-09-14	SO-2017.1	0
SO_C_20180718_O_0711.JPG	2018-07-18 13:52:14	58.48799722	-136.07622778	211	Optimal	0	0	0	0	Good	LFT	2018-09-14	SO-2017.1	0
SO_C_20180718_O_0712.JPG	2018-07-18 13:52:15	58.48800000	-136.07541111	211	Optimal	0	0	0	0	Good	LFT	2018-09-14	SO-2017.1	0
SO_C_20180718_O_0713.JPG	2018-07-18 13:52:16	58.48800833	-136.07460000	211	Optimal	0	0	0	0	Good	LFT	2018-09-14	SO-2017.1	0
SO_C_20180718_O_0714.JPG	2018-07-18 13:52:17	58.48801667	-136.07379167	211	Optimal	0	0	0	0	Good	LFT	2018-09-14	SO-2017.1	0
SO_C_20180718_O_0715.JPG	2018-07-18 13:52:18	58.48803333	-136.07299167	212	Optimal	1	0	0	0	Good	LFT	2018-09-14	SO-2017.1	0
SO_C_20180718_O_0716.JPG	2018-07-18 13:52:19	58.48805000	-136.07219167	212	Optimal	0	0	0	0	Good	LFT	2018-09-14	SO-2017.1	0
SO_C_20180718_O_0717.JPG	2018-07-18 13:52:20	58.48807222	-136.07139722	213	Optimal	0	0	0	0	Good	LFT	2018-09-14	SO-2017.1	0
SO_C_20180718_O_0718.JPG	2018-07-18 13:52:21	58.48809444	-136.07060000	213	Optimal	0	0	0	0	Good	LFT	2018-09-14	SO-2017.1	0
SO_C_20180718_O_0719.JPG	2018-07-18 13:52:22	58.48811667	-136.06980000	214	Optimal	0	0	0	0	Good	LFT	2018-09-14	SO-2017.1	0
SO_C_20180718_O_0720.JPG	2018-07-18 13:52:23	58.48813889	-136.06899722	214	Optimal	0	0	0	0	Good	LFT	2018-09-14	SO-2017.1	0
SO_C_20180718_O_0721.JPG	2018-07-18 13:52:24	58.48815833	-136.06819444	215	Optimal	0	0	0	0	Good	LFT	2018-09-14	SO-2017.1	0
SO_C_20180718_O_0722.JPG	2018-07-18 13:52:25	58.48817500	-136.06738611	215	Optimal	0	0	0	0	Good	LFT	2018-09-14	SO-2017.1	0
SO_C_20180718_O_0723.JPG	2018-07-18 13:52:26	58.48819167	-136.06657778	215	Optimal	0	0	1	0	Good	LFT	2018-09-14	SO-2017.1	0
SO_C_20180718_O_0724.JPG	2018-07-18 13:52:27	58.48820556	-136.06576389	215	Optimal	0	0	1	0	Good	LFT	2018-09-14	SO-2017.1	0
SO_C_20180718_O_0725.JPG	2018-07-18 13:52:28	58.48821944	-136.06495000	215	Optimal	0	0	0	0	Good	LFT	2018-09-14	SO-2017.1	0
SO_C_20180718_O_0726.JPG	2018-07-18 13:52:29	58.48823056	-136.06413333	215	Optimal	0	0	0	0	Good	LFT	2018-09-14	SO-2017.1	0
SO_C_20180718_O_0727.JPG	2018-07-18 13:52:30	58.48823333	-136.06331111	214	Optimal	0	0	0	0	Good	LFT	2018-09-14	SO-2017.1	0
SO_C_20180718_O_0728.JPG	2018-07-18 13:52:31	58.48823889	-136.06248611	214	Optimal	0	0	0	0	Good	LFT	2018-09-14	SO-2017.1	0
SO_C_20180718_O_0729.JPG	2018-07-18 13:52:32	58.48824722	-136.06166389	213	Optimal	0	0	0	0	Good	LFT	2018-09-14	SO-2017.1	0
SO_C_20180718_O_0730.JPG	2018-07-18 13:52:33	58.48825000	-136.06083889	213	Optimal	0	0	0	0	Good	LFT	2018-09-14	SO-2017.1	0
SO_C_20180718_O_0731.JPG	2018-07-18 13:52:34	58.48825278	-136.06001389	212	Optimal	0	0	1	0	Good	LFT	2018-09-14	SO-2017.1	0
SO_C_20180718_O_0732.JPG	2018-07-18 13:52:35	58.48825278	-136.05918889	211	Optimal	0	0	1	0	Good	LFT	2018-09-14	SO-2017.1	0
SO_C_20180718_O_0733.JPG	2018-07-18 13:52:36	58.48825278	-136.05836944	211	Optimal	0	0	0	0	Good	LFT	2018-09-14	SO-2017.1	0
SO_C_20180718_O_0734.JPG	2018-07-18 13:52:37	58.48825000	-136.05755278	210	Optimal	0	0	1	0	Good	LFT	2018-09-14	SO-2017.1	0
SO_C_20180718_O_0735.JPG	2018-07-18 13:52:38	58.48824722	-136.05673056	210	Optimal	0	0	0	0	Good	LFT	2018-09-14	SO-2017.1	0
SO_C_20180718_O_0736.JPG	2018-07-18 13:52:39	58.48824722	-136.05591667	210	Optimal	0	0	0	0	Good	LFT	2018-09-14	SO-2017.1	0
SO_C_20180718_O_0737.JPG	2018-07-18 13:52:40	58.48824722	-136.05509722	210	Optimal	0	0	0	0	Good	LFT	2018-09-14	SO-2017.1	0
SO_C_20180718_O_0738.JPG	2018-07-18 13:52:41	58.48824722	-136.05428056	210	Optimal	0	0	0	0	Good	LFT	2018-09-14	SO-2017.1	0
SO_C_20180718_O_0739.JPG	2018-07-18 13:52:42	58.48825000	-136.05346667	210	Optimal	0	0	0	0	Good	LFT	2018-09-14	SO-2017.1	0
SO_C_20180718_O_0740.JPG	2018-07-18 13:52:43	58.48825556	-136.05265278	210	Optimal	0	0	0	0	Good	LFT	2018-09-14	SO-2017.1	0
SO_C_20180718_O_0741.JPG	2018-07-18 13:52:44	58.48825833	-136.05184722	210	Optimal	0	0	0	0	Good	LFT	2018-09-14	SO-2017.1	0
SO_C_20180718_O_0742.JPG	2018-07-18 13:52:45	58.48826111	-136.05103611	210	Optimal	0	0	0	0	Good	LFT	2018-09-14	SO-2017.1	0
SO_C_20180718_O_0743.JPG	2018-07-18 13:52:46	58.48826389	-136.05023056	210	Optimal	0	0	0	0	Good	LFT	2018-09-14	SO-2017.1	0
SO_C_20180718_O_0744.JPG	2018-07-18 13:52:47	58.48826667	-136.04942500	210	Optimal	0	0	0	0	Good	LFT	2018-09-14	SO-2017.1	0
SO_C_20180718_O_0745.JPG	2018-07-18 13:52:48	58.48826944	-136.04861667	210	Optimal	0	0	0	0	Good	LFT	2018-09-14	SO-2017.1	0
SO_C_20180718_O_0746.JPG	2018-07-18 13:52:49	58.48826944	-136.04781111	211	Optimal	0	0	0	0	Good	LFT	2018-09-14	SO-2017.1	0
SO_C_20180718_O_0747.JPG	2018-07-18 13:52:50	58.48827222	-136.04700556	211	Optimal	0	0	0	0	Good	LFT	2018-09-14	SO-2017.1	0
SO_C_20180718_O_0748.JPG	2018-07-18 13:52:51	58.48827500	-136.04620000	211	Optimal	0	0	0	0	Good	LFT	2018-09-14	SO-2017.1	0
SO_C_20180718_O_0749.JPG	2018-07-18 13:52:52	58.48828056	-136.04539722	211	Optimal	0	0	0	0	Good	LFT	2018-09-14	SO-2017.1	0
SO_C_20180718_O_0750.JPG	2018-07-18 13:52:53	58.48828889	-136.04459444	211	Optimal	0	0	0	0	Good	LFT	2018-09-14	SO-2017.1	0
SO_C_20180718_O_0751.JPG	2018-07-18 13:52:54	58.48830278	-136.04379444	211	Optimal	0	0	0	0	Good	LFT	2018-09-14	SO-2017.1	0
SO_C_20180718_O_0752.JPG	2018-07-18 13:52:55	58.48831111	-136.04299444	211	Optimal	0	0	0	0	Good	LFT	2018-09-14	SO-2017.1	0
SO_C_20180718_O_0753.JPG	2018-07-18 13:52:56	58.48832500	-136.04219444	212	Optimal	0	0	0	0	Good	LFT	2018-09-14	SO-2017.1	0
SO_C_20180718_O_0754.JPG	2018-07-18 13:52:57	58.48834444	-136.04139444	212	Optimal	0	0	0	0	Good	LFT	2018-09-14	SO-2017.1	0
SO_C_20180718_O_0755.JPG	2018-07-18 13:52:58	58.48836389	-136.04059722	212	Optimal	0	0	0	0	Good	LFT	2018-09-14	SO-2017.1	0
SO_C_20180718_O_0756.JPG	2018-07-18 13:52:59	58.48838056	-136.03980278	212	Optimal	0	0	0	0	Good	LFT	2018-09-14	SO-2017.1	0
SO_C_20180718_O_0757.JPG	2018-07-18 13:53:00	58.48839444	-136.03900556	212	Optimal	0	0	0	0	Good	LFT	2018-09-14	SO-2017.1	0
SO_C_20180718_O_0758.JPG	2018-07-18 13:53:01	58.48841111	-136.03821111	212	Optimal	0	0	0	0	Good	LFT	2018-09-14	SO-2017.1	0
SO_C_20180718_O_0759.JPG	2018-07-18 13:53:02	58.48842778	-136.03741389	213	Optimal	0	0	0	0	Good	LFT	2018-09-14	SO-2017.1	0
SO_C_20180718_O_0760.JPG	2018-07-18 13:53:03	58.48844167	-136.03661389	213	Optimal	0	0	0	0	Good	LFT	2018-09-14	SO-2017.1	0
SO_C_20180718_O_0761.JPG	2018-07-18 13:53:04	58.48845833	-136.03581111	213	Optimal	0	0	0	0	Good	LFT	2018-09-14	SO-2017.1	0
SO_C_20180718_O_0762.JPG	2018-07-18 13:53:05	58.48847222	-136.03500556	213	Optimal	0	0	0	0	Good	LFT	2018-09-14	SO-2017.1	0
SO_C_20180718_O_0763.JPG	2018-07-18 13:53:06	58.48848333	-136.03419444	213	Optimal	0	0	0	0	Good	LFT	2018-09-14	SO-2017.1	0
SO_C_20180718_O_0764.JPG	2018-07-18 13:53:07	58.48848889	-136.03338333	213	Optimal	0	0	0	0	Good	LFT	2018-09-14	SO-2017.1	0
SO_C_20180718_O_0765.JPG	2018-07-18 13:53:08	58.48849722	-136.03256667	213	Optimal	0	0	0	0	Good	LFT	2018-09-14	SO-2017.1	0
SO_C_20180718_O_0766.JPG	2018-07-18 13:53:09	58.48850000	-136.03175278	213	Optimal	0	0	0	0	Good	LFT	2018-09-14	SO-2017.1	0
SO_C_20180718_O_0767.JPG	2018-07-18 13:53:10	58.48850278	-136.03093611	212	Optimal	0	0	0	0	Good	LFT	2018-09-14	SO-2017.1	0
SO_C_20180718_O_0768.JPG	2018-07-18 13:53:11	58.48850278	-136.03011667	212	Optimal	0	0	0	0	Good	LFT	2018-09-14	SO-2017.1	0
SO_C_20180718_O_0769.JPG	2018-07-18 13:53:12	58.48850000	-136.02929722	211	Optimal	0	0	0	0	Good	LFT	2018-09-14	SO-2017.1	0
SO_C_20180718_O_0770.JPG	2018-07-18 13:53:13	58.48850000	-136.02847778	211	Optimal	0	0	0	0	Good	LFT	2018-09-14	SO-2017.1	0
SO_C_20180718_O_0771.JPG	2018-07-18 13:53:14	58.48849444	-136.02765833	210	Optimal	0	0	0	0	Good	LFT	2018-09-14	SO-2017.1	0
SO_C_20180718_O_0772.JPG	2018-07-18 13:53:15	58.48848889	-136.02684167	209	Optimal	0	0	0	0	Good	LFT	2018-09-14	SO-2017.1	0
SO_C_20180718_O_0773.JPG	2018-07-18 13:53:16	58.48848056	-136.02602500	209	Optimal	0	0	0	0	Good	LFT	2018-09-14	SO-2017.1	0
SO_C_20180718_O_0774.JPG	2018-07-18 13:53:17	58.48847500	-136.02521667	208	Optimal	0	0	0	0	Good	LFT	2018-09-14	SO-2017.1	0
SO_C_20180718_O_0775.JPG	2018-07-18 13:53:18	58.48846944	-136.02441111	207	Optimal	0	0	0	0	Good	LFT	2018-09-14	SO-2017.1	0
SO_C_20180718_O_0776.JPG	2018-07-18 13:53:19	58.48846667	-136.02361111	207	Optimal	0	0	0	0	Good	LFT	2018-09-14	SO-2017.1	0
SO_C_20180718_O_0777.JPG	2018-07-18 13:53:20	58.48846944	-136.02281944	207	Optimal	0	0	0	0	Good	LFT	2018-09-14	SO-2017.1	0
SO_C_20180718_O_0778.JPG	2018-07-18 13:53:21	58.48847778	-136.02203333	207	Optimal	0	0	1	0	Good	LFT	2018-09-14	SO-2017.1	0
SO_C_20180718_O_0779.JPG	2018-07-18 13:53:22	58.48849167	-136.02125000	207	Optimal	0	0	0	0	Good	LFT	2018-09-14	SO-2017.1	0
SO_C_20180718_O_0780.JPG	2018-07-18 13:53:23	58.48850556	-136.02047222	207	Optimal	0	0	0	0	Good	LFT	2018-09-14	SO-2017.1	0
SO_C_20180718_O_0781.JPG	2018-07-18 13:53:24	58.48852500	-136.01969444	208	Optimal	0	0	0	0	Good	LFT	2018-09-14	SO-2017.1	0
SO_C_20180718_O_0782.JPG	2018-07-18 13:53:25	58.48855000	-136.01891667	209	Optimal	0	0	0	0	Good	LFT	2018-09-14	SO-2017.1	0
SO_C_20180718_O_0783.JPG	2018-07-18 13:53:26	58.48857222	-136.01813333	210	Optimal	0	0	0	0	Good	LFT	2018-09-14	SO-2017.1	0
SO_C_20180718_O_0784.JPG	2018-07-18 13:53:27	58.48859722	-136.01734444	211	Optimal	0	0	0	0	Good	LFT	2018-09-14	SO-2017.1	0
SO_C_20180718_O_0785.JPG	2018-07-18 13:53:28	58.48862222	-136.01655556	212	Optimal	0	0	0	0	Good	LFT	2018-09-14	SO-2017.1	0
SO_C_20180718_O_0786.JPG	2018-07-18 13:53:29	58.48864722	-136.01576111	213	Optimal	0	0	1	0	Good	LFT	2018-09-14	SO-2017.1	0
SO_C_20180718_O_0787.JPG	2018-07-18 13:53:30	58.48866944	-136.01496389	213	Optimal	0	0	1	0	Good	LFT	2018-09-14	SO-2017.1	0
SO_C_20180718_O_0788.JPG	2018-07-18 13:53:31	58.48869167	-136.01416111	213	Optimal	0	0	1	0	Good	LFT	2018-09-14	SO-2017.1	0
SO_C_20180718_O_0789.JPG	2018-07-18 13:53:32	58.48870833	-136.01335833	213	Optimal	0	0	1	0	Good	LFT	2018-09-14	SO-2017.1	0
SO_C_20180718_O_0790.JPG	2018-07-18 13:53:33	58.48872222	-136.01255556	213	Optimal	0	0	1	0	Good	LFT	2018-09-14	SO-2017.1	0
SO_C_20180718_O_0791.JPG	2018-07-18 13:53:34	58.48873611	-136.01175000	213	Optimal	0	0	1	0	Good	LFT	2018-09-14	SO-2017.1	0
SO_C_20180718_O_0792.JPG	2018-07-18 13:53:35	58.48874444	-136.01094167	212	Optimal	0	0	1	0	Good	LFT	2018-09-14	SO-2017.1	0
SO_C_20180718_O_0793.JPG	2018-07-18 13:53:36	58.48875000	-136.01013889	212	Optimal	0	0	1	0	Good	LFT	2018-09-14	SO-2017.1	0
SO_C_20180718_O_0794.JPG	2018-07-18 13:53:37	58.48875278	-136.00933611	211	Optimal	0	0	1	0	Good	LFT	2018-09-14	SO-2017.1	0
SO_C_20180718_O_0795.JPG	2018-07-18 13:53:38	58.48875556	-136.00853333	211	Optimal	0	0	0	0	Good	LFT	2018-09-14	SO-2017.1	0
SO_C_20180718_O_0796.JPG	2018-07-18 13:53:39	58.48875833	-136.00773889	211	Optimal	0	0	0	0	Good	LFT	2018-09-14	SO-2017.1	0
SO_C_20180718_O_0797.JPG	2018-07-18 13:53:40	58.48876111	-136.00693889	210	Optimal	0	0	0	0	Good	LFT	2018-09-14	SO-2017.1	0
SO_C_20180718_O_0798.JPG	2018-07-18 13:53:41	58.48876667	-136.00613889	210	Optimal	0	0	0	0	Good	LFT	2018-09-14	SO-2017.1	0
SO_C_20180718_O_0799.JPG	2018-07-18 13:53:42	58.48877222	-136.00533889	210	Optimal	0	0	0	0	Good	LFT	2018-09-14	SO-2017.1	0
SO_C_20180718_O_0800.JPG	2018-07-18 13:53:43	58.48877778	-136.00454444	210	Optimal	0	0	1	0	Good	LFT	2018-09-14	SO-2017.1	0
SO_C_20180718_O_0801.JPG	2018-07-18 13:53:44	58.48878056	-136.00374722	210	Optimal	0	0	1	0	Good	LFT	2018-09-14	SO-2017.1	0
SO_C_20180718_O_0802.JPG	2018-07-18 13:53:45	58.48878333	-136.00295278	210	Optimal	0	0	0	0	Good	LFT	2018-09-14	SO-2017.1	0
SO_C_20180718_O_0803.JPG	2018-07-18 13:53:46	58.48878611	-136.00215556	211	Optimal	0	0	1	0	Good	LFT	2018-09-14	SO-2017.1	0
SO_C_20180718_O_0804.JPG	2018-07-18 13:53:47	58.48878611	-136.00136111	211	Optimal	0	0	1	0	Good	LFT	2018-09-14	SO-2017.1	0
SO_C_20180718_O_0805.JPG	2018-07-18 13:53:48	58.48878611	-136.00056944	211	Optimal	0	0	1	0	Good	LFT	2018-09-14	SO-2017.1	0
SO_C_20180718_O_0806.JPG	2018-07-18 13:53:49	58.48878611	-135.99977500	211	Optimal	0	0	1	0	Good	LFT	2018-09-14	SO-2017.1	0
SO_C_20180718_O_0807.JPG	2018-07-18 13:53:50	58.48878611	-135.99898056	211	Optimal	0	0	1	0	Good	LFT	2018-09-14	SO-2017.1	0
SO_C_20180718_O_0808.JPG	2018-07-18 13:53:51	58.48878333	-135.99818333	211	Optimal	0	0	1	0	Good	LFT	2018-09-14	SO-2017.1	0
SO_C_20180718_O_0809.JPG	2018-07-18 13:53:52	58.48878333	-135.99739167	211	Optimal	0	0	1	0	Good	LFT	2018-09-14	SO-2017.1	0
SO_C_20180718_O_0810.JPG	2018-07-18 13:53:53	58.48878611	-135.99659722	211	Optimal	0	0	0	0	Good	LFT	2018-09-14	SO-2017.1	0
SO_C_20180718_O_0811.JPG	2018-07-18 13:53:54	58.48878611	-135.99580278	211	Optimal	0	0	0	0	Good	LFT	2018-09-14	SO-2017.1	0
SO_C_20180718_O_0812.JPG	2018-07-18 13:53:55	58.48878889	-135.99500556	211	Optimal	0	0	0	0	Good	LFT	2018-09-14	SO-2017.1	0
SO_C_20180718_O_0813.JPG	2018-07-18 13:53:56	58.48878611	-135.99420833	211	Optimal	0	0	1	0	Good	LFT	2018-09-14	SO-2017.1	0
SO_C_20180718_O_0814.JPG	2018-07-18 13:53:57	58.48878333	-135.99340833	211	Optimal	0	0	1	0	Good	LFT	2018-09-14	SO-2017.1	0
SO_C_20180718_O_0815.JPG	2018-07-18 13:53:58	58.48878056	-135.99261111	211	Optimal	0	0	1	0	Good	LFT	2018-09-14	SO-2017.1	0
SO_C_20180718_O_0816.JPG	2018-07-18 13:53:59	58.48878056	-135.99181389	210	Optimal	0	0	1	0	Good	LFT	2018-09-14	SO-2017.1	0
SO_C_20180718_O_0817.JPG	2018-07-18 13:54:00	58.48878056	-135.99101944	210	Optimal	0	0	1	0	Good	LFT	2018-09-14	SO-2017.1	0
SO_C_20180718_O_0818.JPG	2018-07-18 13:54:01	58.48878333	-135.99022222	210	Optimal	0	0	1	0	Good	LFT	2018-09-14	SO-2017.1	0
SO_C_20180718_O_0819.JPG	2018-07-18 13:54:02	58.48878611	-135.98942500	210	Optimal	0	0	1	0	Good	LFT	2018-09-14	SO-2017.1	0
SO_C_20180718_O_0820.JPG	2018-07-18 13:54:03	58.48878611	-135.98863056	210	Optimal	0	0	1	0	Good	LFT	2018-09-14	SO-2017.1	0
SO_C_20180718_O_0821.JPG	2018-07-18 13:54:04	58.48878889	-135.98783333	210	Optimal	0	0	1	0	Good	LFT	2018-09-14	SO-2017.1	0
SO_C_20180718_O_0822.JPG	2018-07-18 13:54:05	58.48879167	-135.98703889	210	Optimal	0	0	0	0	Good	LFT	2018-09-14	SO-2017.1	0
SO_C_20180718_O_0823.JPG	2018-07-18 13:54:06	58.48879444	-135.98624444	210	Optimal	0	0	1	0	Good	LFT	2018-09-14	SO-2017.1	0
SO_C_20180718_O_0824.JPG	2018-07-18 13:54:07	58.48880000	-135.98544722	210	Optimal	0	0	1	0	Good	LFT	2018-09-14	SO-2017.1	0
SO_C_20180718_O_0825.JPG	2018-07-18 13:54:08	58.48880556	-135.98465000	210	Optimal	0	0	1	0	Good	LFT	2018-09-14	SO-2017.1	0
SO_C_20180718_O_0826.JPG	2018-07-18 13:54:09	58.48881111	-135.98385556	210	Optimal	0	0	1	0	Good	LFT	2018-09-14	SO-2017.1	0
SO_C_20180718_O_0827.JPG	2018-07-18 13:54:10	58.48881667	-135.98305278	211	Optimal	0	0	1	0	Good	LFT	2018-09-14	SO-2017.1	0
SO_C_20180718_O_0828.JPG	2018-07-18 13:54:11	58.48882222	-135.98225278	211	Optimal	0	0	1	0	Good	LFT	2018-09-14	SO-2017.1	0
SO_C_20180718_O_0829.JPG	2018-07-18 13:54:12	58.48882778	-135.98144722	211	Optimal	0	0	1	0	Good	LFT	2018-09-14	SO-2017.1	0
SO_C_20180718_O_0830.JPG	2018-07-18 13:54:13	58.48883611	-135.98063611	211	Optimal	0	0	1	0	Good	LFT	2018-09-14	SO-2017.1	0
SO_C_20180718_O_0831.JPG	2018-07-18 13:54:14	58.48884167	-135.97983056	211	Optimal	0	0	1	0	Good	LFT	2018-09-14	SO-2017.1	0
SO_C_20180718_O_0832.JPG	2018-07-18 13:54:15	58.48885278	-135.97902222	211	Optimal	0	0	1	0	Good	LFT	2018-09-14	SO-2017.1	0
SO_C_20180718_O_0833.JPG	2018-07-18 13:54:16	58.48886667	-135.97821111	211	Optimal	0	0	1	0	Good	LFT	2018-09-14	SO-2017.1	0
SO_C_20180718_O_0834.JPG	2018-07-18 13:54:17	58.48887778	-135.97739722	211	Optimal	0	0	0	0	Good	LFT	2018-09-14	SO-2017.1	0
SO_C_20180718_O_0835.JPG	2018-07-18 13:54:18	58.48888611	-135.97658056	211	Optimal	0	0	1	0	Good	LFT	2018-09-14	SO-2017.1	0
SO_C_20180718_O_0836.JPG	2018-07-18 13:54:19	58.48889722	-135.97576389	211	Optimal	0	0	0	0	Good	LFT	2018-09-14	SO-2017.1	0
SO_C_20180718_O_0837.JPG	2018-07-18 13:54:20	58.48890556	-135.97495000	210	Optimal	0	0	0	0	Good	LFT	2018-09-14	SO-2017.1	0
SO_C_20180718_O_0838.JPG	2018-07-18 13:54:21	58.48891389	-135.97413611	210	Optimal	0	0	1	0	Good	LFT	2018-09-14	SO-2017.1	0
SO_C_20180718_O_0839.JPG	2018-07-18 13:54:22	58.48892222	-135.97332222	209	Optimal	0	0	1	0	Good	LFT	2018-09-14	SO-2017.1	0
SO_C_20180718_O_0840.JPG	2018-07-18 13:54:23	58.48892778	-135.97250556	209	Optimal	0	0	1	1	Good	LFT	2018-09-14	SO-2017.1	0
SO_C_20180718_O_0841.JPG	2018-07-18 13:54:24	58.48893333	-135.97168889	208	Optimal	0	0	0	1	Good	LFT	2018-09-14	SO-2017.1	0
SO_C_20180718_O_0842.JPG	2018-07-18 13:54:25	58.48893889	-135.97087222	208	Optimal	0	0	0	1	Good	LFT	2018-09-14	SO-2017.1	0
SO_C_20180718_O_0843.JPG	2018-07-18 13:54:26	58.48894444	-135.97005556	207	Optimal	0	0	0	1	Good	LFT	2018-09-14	SO-2017.1	0
SO_C_20180718_O_0844.JPG	2018-07-18 13:54:27	58.48895000	-135.96924167	207	Optimal	0	0	0	1	Good	LFT	2018-09-14	SO-2017.1	0
SO_C_20180718_O_0845.JPG	2018-07-18 13:54:28	58.48895556	-135.96843056	207	Optimal	0	0	0	1	Good	LFT	2018-09-14	SO-2017.1	0
SO_C_20180718_O_0846.JPG	2018-07-18 13:54:29	58.48896389	-135.96761667	207	Optimal	0	0	0	1	Good	LFT	2018-09-14	SO-2017.1	0
SO_C_20180718_O_0847.JPG	2018-07-18 13:54:30	58.48897500	-135.96680833	207	Optimal	0	0	0	1	Good	LFT	2018-09-14	SO-2017.1	0
SO_C_20180718_O_0848.JPG	2018-07-18 13:54:31	58.48898611	-135.96599722	208	Optimal	0	0	0	1	Good	LFT	2018-09-14	SO-2017.1	0
SO_C_20180718_O_0849.JPG	2018-07-18 13:54:32	58.48899722	-135.96518889	208	Optimal	0	0	0	1	Good	LFT	2018-09-14	SO-2017.1	0
SO_C_20180718_O_0850.JPG	2018-07-18 13:54:33	58.48901111	-135.96438056	208	Optimal	0	0	0	1	Good	LFT	2018-09-14	SO-2017.1	0
SO_C_20180718_O_0851.JPG	2018-07-18 13:54:34	58.48902500	-135.96357500	209	Optimal	0	0	0	1	Good	LFT	2018-09-14	SO-2017.1	0
SO_C_20180718_O_0852.JPG	2018-07-18 13:54:35	58.48903889	-135.96276667	209	Optimal	0	0	0	1	Good	LFT	2018-09-14	SO-2017.1	0
SO_C_20180718_O_0853.JPG	2018-07-18 13:54:36	58.48905556	-135.96195833	209	Optimal	0	0	0	1	Good	LFT	2018-09-14	SO-2017.1	0
SO_C_20180718_O_0854.JPG	2018-07-18 13:54:37	58.48907500	-135.96115278	210	Optimal	0	0	0	1	Good	LFT	2018-09-14	SO-2017.1	0
SO_C_20180718_O_0855.JPG	2018-07-18 13:54:38	58.48909167	-135.96034722	210	Optimal	0	0	0	1	Good	LFT	2018-09-14	SO-2017.1	0
SO_C_20180718_O_0856.JPG	2018-07-18 13:54:39	58.48911111	-135.95953889	210	Optimal	0	0	0	1	Good	LFT	2018-09-14	SO-2017.1	0
SO_C_20180718_O_0857.JPG	2018-07-18 13:54:40	58.48912778	-135.95873333	210	Optimal	0	0	1	1	Good	LFT	2018-09-14	SO-2017.1	0
SO_C_20180718_O_0858.JPG	2018-07-18 13:54:41	58.48914444	-135.95793056	210	Optimal	0	0	1	1	Good	LFT	2018-09-14	SO-2017.1	0
SO_C_20180718_O_0859.JPG	2018-07-18 13:54:42	58.48916111	-135.95712500	211	Optimal	0	0	1	1	Good	LFT	2018-09-14	SO-2017.1	0
SO_C_20180718_O_0860.JPG	2018-07-18 13:54:43	58.48917500	-135.95631944	211	Optimal	0	0	1	0	Good	LFT	2018-09-14	SO-2017.1	0
SO_C_20180718_O_0861.JPG	2018-07-18 13:54:44	58.48919167	-135.95551389	211	Optimal	0	0	1	1	Good	LFT	2018-09-14	SO-2017.1	0
SO_C_20180718_O_0862.JPG	2018-07-18 13:54:45	58.48920556	-135.95471111	211	Optimal	0	0	1	1	Good	LFT	2018-09-14	SO-2017.1	0
SO_C_20180718_O_0863.JPG	2018-07-18 13:54:46	58.48922222	-135.95390833	211	Optimal	0	0	0	1	Good	LFT	2018-09-14	SO-2017.1	0
SO_C_20180718_O_0864.JPG	2018-07-18 13:54:47	58.48923611	-135.95310833	211	Optimal	0	0	0	1	Good	LFT	2018-09-14	SO-2017.1	0
SO_C_20180718_O_0865.JPG	2018-07-18 13:54:48	58.48924722	-135.95230278	211	Optimal	0	0	0	1	Good	LFT	2018-09-14	SO-2017.1	0
SO_C_20180718_O_0866.JPG	2018-07-18 13:54:49	58.48925833	-135.95149722	211	Optimal	0	0	0	1	Good	LFT	2018-09-14	SO-2017.1	0
SO_C_20180718_O_0867.JPG	2018-07-18 13:54:50	58.48927500	-135.95069444	211	Optimal	0	0	0	1	Good	LFT	2018-09-14	SO-2017.1	0
SO_C_20180718_O_0868.JPG	2018-07-18 13:54:51	58.48928889	-135.94989444	212	Optimal	0	0	0	1	Good	LFT	2018-09-14	SO-2017.1	0
SO_C_20180718_O_0869.JPG	2018-07-18 13:54:52	58.48930278	-135.94909444	212	Optimal	0	0	0	1	Good	LFT	2018-09-14	SO-2017.1	0
SO_C_20180718_O_0870.JPG	2018-07-18 13:54:53	58.48931389	-135.94829444	212	Optimal	0	0	0	1	Good	LFT	2018-09-14	SO-2017.1	0
SO_C_20180718_O_0871.JPG	2018-07-18 13:54:54	58.48932222	-135.94748889	212	Optimal	0	0	0	1	Good	LFT	2018-09-14	SO-2017.1	0
SO_C_20180718_O_0872.JPG	2018-07-18 13:54:55	58.48932500	-135.94668333	212	Optimal	0	0	0	1	Good	LFT	2018-09-14	SO-2017.1	0
SO_C_20180718_O_0873.JPG	2018-07-18 13:54:56	58.48932778	-135.94588056	212	Optimal	0	0	0	1	Good	LFT	2018-09-14	SO-2017.1	0
SO_C_20180718_O_0874.JPG	2018-07-18 13:54:57	58.48932222	-135.94507500	212	Optimal	0	0	0	1	Good	LFT	2018-09-14	SO-2017.1	0
SO_C_20180718_O_0875.JPG	2018-07-18 13:54:58	58.48931389	-135.94426667	211	Optimal	0	0	0	1	Good	LFT	2018-09-14	SO-2017.1	0
SO_C_20180718_O_0876.JPG	2018-07-18 13:54:59	58.48930000	-135.94345833	211	Optimal	0	0	0	1	Good	LFT	2018-09-14	SO-2017.1	0
SO_C_20180718_O_0877.JPG	2018-07-18 13:55:00	58.48928333	-135.94264722	211	Optimal	0	0	0	1	Good	LFT	2018-09-14	SO-2017.1	0
SO_C_20180718_O_0878.JPG	2018-07-18 13:55:01	58.48926389	-135.94183889	210	Optimal	0	0	0	1	Good	LFT	2018-09-14	SO-2017.1	0
SO_C_20180718_O_0879.JPG	2018-07-18 13:55:02	58.48924444	-135.94103333	210	Optimal	0	0	0	1	Good	LFT	2018-09-14	SO-2017.1	0
SO_C_20180718_O_0880.JPG	2018-07-18 13:55:03	58.48922500	-135.94022778	210	Optimal	0	0	0	1	Good	LFT	2018-09-14	SO-2017.1	0
SO_C_20180718_O_0881.JPG	2018-07-18 13:55:04	58.48920556	-135.93942500	209	Optimal	0	0	0	1	Good	LFT	2018-09-14	SO-2017.1	0
SO_C_20180718_O_0882.JPG	2018-07-18 13:55:05	58.48918889	-135.93862500	208	Optimal	0	0	0	1	Good	LFT	2018-09-14	SO-2017.1	0
SO_C_20180718_O_0883.JPG	2018-07-18 13:55:06	58.48917500	-135.93782778	208	Optimal	0	0	1	1	Good	LFT	2018-09-14	SO-2017.1	0
SO_C_20180718_O_0884.JPG	2018-07-18 13:55:07	58.48916389	-135.93703611	208	Optimal	0	0	1	1	Good	LFT	2018-09-14	SO-2017.1	0
SO_C_20180718_O_0885.JPG	2018-07-18 13:55:08	58.48915833	-135.93624444	208	Optimal	0	0	1	1	Good	LFT	2018-09-14	SO-2017.1	0
SO_C_20180718_O_0886.JPG	2018-07-18 13:55:09	58.48915833	-135.93545833	207	Optimal	0	0	1	1	Good	LFT	2018-09-14	SO-2017.1	0
SO_C_20180718_O_0887.JPG	2018-07-18 13:55:10	58.48916389	-135.93467222	207	Optimal	0	0	1	1	Good	LFT	2018-09-14	SO-2017.1	0
SO_C_20180718_O_0888.JPG	2018-07-18 13:55:11	58.48916944	-135.93388889	208	Optimal	0	0	1	1	Good	LFT	2018-09-14	SO-2017.1	0
SO_C_20180718_O_0889.JPG	2018-07-18 13:55:12	58.48918056	-135.93310000	208	Optimal	0	0	1	0	Good	LFT	2018-09-14	SO-2017.1	0
SO_C_20180718_O_0890.JPG	2018-07-18 13:55:13	58.48919167	-135.93231389	208	Optimal	0	0	1	0	Good	LFT	2018-09-14	SO-2017.1	0
SO_C_20180718_O_0891.JPG	2018-07-18 13:55:14	58.48920833	-135.93152778	208	Optimal	0	0	1	0	Good	LFT	2018-09-14	SO-2017.1	0
SO_C_20180718_O_0892.JPG	2018-07-18 13:55:15	58.48922222	-135.93073889	209	Optimal	0	0	1	1	Good	LFT	2018-09-14	SO-2017.1	0
SO_C_20180718_O_0893.JPG	2018-07-18 13:55:16	58.48923889	-135.92994722	209	Optimal	0	0	1	1	Good	LFT	2018-09-14	SO-2017.1	0
SO_C_20180718_O_0894.JPG	2018-07-18 13:55:17	58.48925833	-135.92915556	209	Optimal	0	0	1	1	Good	LFT	2018-09-14	SO-2017.1	0
SO_C_20180718_O_0895.JPG	2018-07-18 13:55:18	58.48927222	-135.92836389	209	Optimal	0	0	0	1	Good	LFT	2018-09-14	SO-2017.1	0
SO_C_20180718_O_0896.JPG	2018-07-18 13:55:19	58.48929167	-135.92756667	209	Optimal	0	0	0	1	Good	LFT	2018-09-14	SO-2017.1	0
SO_C_20180718_O_0897.JPG	2018-07-18 13:55:20	58.48930556	-135.92676944	209	Optimal	0	0	0	1	Good	LFT	2018-09-14	SO-2017.1	0
SO_C_20180718_O_0898.JPG	2018-07-18 13:55:21	58.48931667	-135.92596944	209	Optimal	0	0	0	1	Good	LFT	2018-09-14	SO-2017.1	0
SO_C_20180718_O_0899.JPG	2018-07-18 13:55:22	58.48932500	-135.92516667	209	Optimal	0	0	0	1	Good	LFT	2018-09-14	SO-2017.1	0
SO_C_20180718_O_0900.JPG	2018-07-18 13:55:23	58.48933056	-135.92436389	209	Optimal	0	0	0	1	Good	LFT	2018-09-14	SO-2017.1	0
SO_C_20180718_O_0901.JPG	2018-07-18 13:55:24	58.48933889	-135.92355833	209	Optimal	0	0	0	1	Good	LFT	2018-09-14	SO-2017.1	0
SO_C_20180718_O_0902.JPG	2018-07-18 13:55:25	58.48934444	-135.92275278	208	Optimal	0	0	0	1	Good	LFT	2018-09-14	SO-2017.1	0
SO_C_20180718_O_0903.JPG	2018-07-18 13:55:26	58.48935000	-135.92194444	208	Optimal	0	0	0	1	Good	LFT	2018-09-14	SO-2017.1	0
SO_C_20180718_O_0904.JPG	2018-07-18 13:55:27	58.48935833	-135.92113611	208	Optimal	0	0	0	1	Good	LFT	2018-09-14	SO-2017.1	0
SO_C_20180718_O_0905.JPG	2018-07-18 13:55:28	58.48936389	-135.92032778	208	Optimal	0	0	0	1	Good	LFT	2018-09-14	SO-2017.1	0
SO_C_20180718_O_0906.JPG	2018-07-18 13:55:29	58.48936667	-135.91951944	209	Optimal	0	0	0	1	Good	LFT	2018-09-14	SO-2017.1	0
SO_C_20180718_O_0907.JPG	2018-07-18 13:55:30	58.48936944	-135.91871111	209	Optimal	0	0	0	1	Good	LFT	2018-09-14	SO-2017.1	0
SO_C_20180718_O_0908.JPG	2018-07-18 13:55:31	58.48937500	-135.91790000	209	Optimal	0	0	0	1	Good	LFT	2018-09-14	SO-2017.1	0
SO_C_20180718_O_0909.JPG	2018-07-18 13:55:32	58.48938333	-135.91709167	210	Optimal	0	0	0	1	Good	LFT	2018-09-14	SO-2017.1	0
SO_C_20180718_O_0910.JPG	2018-07-18 13:55:33	58.48939167	-135.91628333	210	Optimal	0	0	0	1	Good	LFT	2018-09-14	SO-2017.1	0
SO_C_20180718_O_0911.JPG	2018-07-18 13:55:34	58.48939722	-135.91547222	211	Optimal	0	0	0	1	Good	LFT	2018-09-14	SO-2017.1	0
SO_C_20180718_O_0912.JPG	2018-07-18 13:55:35	58.48940278	-135.91466389	211	Optimal	0	0	0	1	Good	LFT	2018-09-14	SO-2017.1	0
SO_C_20180718_O_0913.JPG	2018-07-18 13:55:36	58.48940833	-135.91385278	212	Optimal	0	0	0	1	Good	LFT	2018-09-14	SO-2017.1	0
SO_C_20180718_O_0914.JPG	2018-07-18 13:55:37	58.48941111	-135.91303889	212	Optimal	0	0	0	1	Good	LFT	2018-09-14	SO-2017.1	0
SO_C_20180718_O_0915.JPG	2018-07-18 13:55:38	58.48941389	-135.91221667	212	Optimal	0	0	0	1	Good	LFT	2018-09-14	SO-2017.1	0
SO_C_20180718_O_0916.JPG	2018-07-18 13:55:39	58.48941389	-135.91139444	213	Optimal	0	0	0	1	Good	LFT	2018-09-14	SO-2017.1	0
SO_C_20180718_O_0917.JPG	2018-07-18 13:55:40	58.48941111	-135.91056667	213	Optimal	0	0	0	1	Good	LFT	2018-09-14	SO-2017.1	0
SO_C_20180718_O_0918.JPG	2018-07-18 13:55:41	58.48940556	-135.90973611	213	Optimal	0	0	0	1	Good	LFT	2018-09-14	SO-2017.1	0
SO_C_20180718_O_0919.JPG	2018-07-18 13:55:42	58.48940000	-135.90890278	213	Optimal	0	0	0	1	Good	LFT	2018-09-14	SO-2017.1	0
SO_C_20180718_O_0920.JPG	2018-07-18 13:55:43	58.48939167	-135.90806667	213	Optimal	0	0	0	1	Good	LFT	2018-09-14	SO-2017.1	0
SO_C_20180718_O_0921.JPG	2018-07-18 13:55:44	58.48938611	-135.90722778	212	Optimal	0	0	0	1	Good	LFT	2018-09-14	SO-2017.1	0
SO_C_20180718_O_0922.JPG	2018-07-18 13:55:45	58.48938056	-135.90639167	212	Optimal	0	0	0	1	Good	LFT	2018-09-14	SO-2017.1	0
SO_C_20180718_O_0923.JPG	2018-07-18 13:55:46	58.48937778	-135.90555556	211	Optimal	0	0	0	0	Good	LFT	2018-09-14	SO-2017.1	0
SO_C_20180718_O_0924.JPG	2018-07-18 13:55:47	58.48937500	-135.90472222	210	Optimal	0	0	0	0	Good	LFT	2018-09-14	SO-2017.1	0
SO_C_20180718_O_0925.JPG	2018-07-18 13:55:48	58.48937222	-135.90389167	210	Optimal	0	0	1	0	Good	LFT	2018-09-14	SO-2017.1	0
SO_C_20180718_O_0926.JPG	2018-07-18 13:55:49	58.48937222	-135.90306111	210	Optimal	0	0	0	0	Good	LFT	2018-09-14	SO-2017.1	0
SO_C_20180718_O_0927.JPG	2018-07-18 13:55:50	58.48937500	-135.90223333	209	Optimal	0	0	0	0	Good	LFT	2018-09-14	SO-2017.1	0
SO_C_20180718_O_0928.JPG	2018-07-18 13:55:51	58.48938056	-135.90140556	209	Optimal	0	0	1	0	Good	LFT	2018-09-14	SO-2017.1	0
SO_C_20180718_O_0929.JPG	2018-07-18 13:55:52	58.48938611	-135.90058056	210	Optimal	0	0	1	0	Good	LFT	2018-09-14	SO-2017.1	0
SO_C_20180718_O_0930.JPG	2018-07-18 13:55:53	58.48939444	-135.89975278	210	Optimal	0	0	0	1	Good	LFT	2018-09-14	SO-2017.1	0
SO_C_20180718_O_0931.JPG	2018-07-18 13:55:54	58.48940278	-135.89892222	211	Optimal	0	0	0	1	Good	LFT	2018-09-14	SO-2017.1	0
SO_C_20180718_O_0932.JPG	2018-07-18 13:55:55	58.48940833	-135.89808889	211	Optimal	0	0	0	1	Good	LFT	2018-09-14	SO-2017.1	0
SO_C_20180718_O_0933.JPG	2018-07-18 13:55:56	58.48941667	-135.89725278	212	Optimal	0	0	0	1	Good	LFT	2018-09-14	SO-2017.1	0
SO_C_20180718_O_0934.JPG	2018-07-18 13:55:57	58.48942500	-135.89641667	212	Optimal	0	0	0	1	Good	LFT	2018-09-14	SO-2017.1	0
SO_C_20180718_O_0935.JPG	2018-07-18 13:55:58	58.48943056	-135.89557500	213	Optimal	0	0	0	1	Good	LFT	2018-09-14	SO-2017.1	0
SO_C_20180718_O_0936.JPG	2018-07-18 13:55:59	58.48943889	-135.89473333	213	Optimal	0	0	0	1	Good	LFT	2018-09-14	SO-2017.1	0
SO_C_20180718_O_0937.JPG	2018-07-18 13:56:00	58.48944722	-135.89389167	213	Optimal	0	0	0	1	Good	LFT	2018-09-14	SO-2017.1	0
SO_C_20180718_O_0938.JPG	2018-07-18 13:56:01	58.48945278	-135.89304444	213	Optimal	0	0	0	1	Good	LFT	2018-09-14	SO-2017.1	0
SO_C_20180718_O_0939.JPG	2018-07-18 13:56:02	58.48945833	-135.89220000	213	Optimal	0	0	0	1	Good	LFT	2018-09-14	SO-2017.1	0
SO_C_20180718_O_0940.JPG	2018-07-18 13:56:03	58.48946667	-135.89135278	213	Optimal	0	0	0	0	Good	LFT	2018-09-14	SO-2017.1	0
SO_C_20180718_O_0941.JPG	2018-07-18 13:56:04	58.48946944	-135.89050556	212	Optimal	0	0	0	0	Good	LFT	2018-09-14	SO-2017.1	0
SO_C_20180718_O_0942.JPG	2018-07-18 13:56:05	58.48947222	-135.88965833	212	Optimal	0	0	0	0	Good	LFT	2018-09-14	SO-2017.1	0
SO_C_20180718_O_0943.JPG	2018-07-18 13:56:06	58.48947500	-135.88880833	212	Optimal	0	0	0	0	Good	LFT	2018-09-14	SO-2017.1	0
SO_C_20180718_O_0944.JPG	2018-07-18 13:56:07	58.48948056	-135.88796389	211	Optimal	0	0	0	0	Good	LFT	2018-09-14	SO-2017.1	0
SO_C_20180718_O_0945.JPG	2018-07-18 13:56:08	58.48948611	-135.88711667	211	Optimal	0	0	0	0	Good	LFT	2018-09-14	SO-2017.1	0
SO_C_20180718_O_0946.JPG	2018-07-18 13:56:09	58.48949167	-135.88627222	211	Optimal	0	0	0	0	Good	LFT	2018-09-14	SO-2017.1	0
SO_C_20180718_O_0947.JPG	2018-07-18 13:56:10	58.48949722	-135.88543056	211	Optimal	0	0	0	0	Good	LFT	2018-09-14	SO-2017.1	0
SO_C_20180718_O_0948.JPG	2018-07-18 13:56:11	58.48950556	-135.88459167	211	Optimal	0	0	0	0	Good	LFT	2018-09-14	SO-2017.1	0
SO_C_20180718_O_0949.JPG	2018-07-18 13:56:12	58.48951389	-135.88375833	211	Optimal	0	0	0	0	Good	LFT	2018-09-14	SO-2017.1	0
SO_C_20180718_O_0950.JPG	2018-07-18 13:56:13	58.48952500	-135.88292778	212	Optimal	0	0	0	1	Good	LFT	2018-09-14	SO-2017.1	0
SO_C_20180718_O_0951.JPG	2018-07-18 13:56:14	58.48953889	-135.88210000	212	Optimal	0	0	0	1	Good	LFT	2018-09-14	SO-2017.1	0
SO_C_20180718_O_0952.JPG	2018-07-18 13:56:15	58.48955278	-135.88127500	213	Optimal	0	0	0	1	Good	LFT	2018-09-14	SO-2017.1	0
SO_C_20180718_O_0953.JPG	2018-07-18 13:56:16	58.48956944	-135.88045278	214	Optimal	0	0	0	1	Good	LFT	2018-09-14	SO-2017.1	0
SO_C_20180718_O_0954.JPG	2018-07-18 13:56:17	58.48958611	-135.87963333	215	Optimal	0	0	0	1	Good	LFT	2018-09-14	SO-2017.1	0
SO_C_20180718_O_0955.JPG	2018-07-18 13:56:18	58.48960556	-135.87881389	216	Optimal	0	0	0	1	Good	LFT	2018-09-14	SO-2017.1	0
SO_C_20180718_O_0956.JPG	2018-07-18 13:56:19	58.48962500	-135.87800278	217	Optimal	0	0	0	1	Good	LFT	2018-09-14	SO-2017.1	0
SO_C_20180718_O_0957.JPG	2018-07-18 13:58:45	58.50061111	-135.85021389	204	Optimal	0	0	1	1	Good	LFT	2018-09-14	SO-2017.1	0
SO_C_20180718_O_0958.JPG	2018-07-18 13:58:46	58.50062222	-135.85101111	204	Optimal	0	0	0	1	Good	LFT	2018-09-14	SO-2017.1	0
SO_C_20180718_O_0959.JPG	2018-07-18 13:58:47	58.50063889	-135.85180833	204	Optimal	0	0	0	1	Good	LFT	2018-09-14	SO-2017.1	0
SO_C_20180718_O_0960.JPG	2018-07-18 13:58:48	58.50065556	-135.85260556	203	Optimal	0	0	0	1	Good	LFT	2018-09-14	SO-2017.1	0
SO_C_20180718_O_0961.JPG	2018-07-18 13:58:49	58.50067778	-135.85339722	203	Optimal	0	0	0	1	Good	LFT	2018-09-14	SO-2017.1	0
SO_C_20180718_O_0962.JPG	2018-07-18 13:58:50	58.50069722	-135.85418889	203	Optimal	0	0	0	1	Good	LFT	2018-09-14	SO-2017.1	0
SO_C_20180718_O_0963.JPG	2018-07-18 13:58:51	58.50071667	-135.85497500	203	Optimal	0	0	0	1	Good	LFT	2018-09-14	SO-2017.1	0
SO_C_20180718_O_0964.JPG	2018-07-18 13:58:52	58.50073611	-135.85576111	202	Optimal	0	0	0	1	Good	LFT	2018-09-14	SO-2017.1	0
SO_C_20180718_O_0965.JPG	2018-07-18 13:58:53	58.50074722	-135.85654167	202	Optimal	0	0	0	1	Good	LFT	2018-09-14	SO-2017.1	0
SO_C_20180718_O_0966.JPG	2018-07-18 13:58:54	58.50075556	-135.85731667	202	Optimal	0	0	0	1	Good	LFT	2018-09-14	SO-2017.1	0
SO_C_20180718_O_0967.JPG	2018-07-18 13:58:55	58.50076389	-135.85808889	203	Optimal	0	0	0	1	Good	LFT	2018-09-14	SO-2017.1	0
SO_C_20180718_O_0968.JPG	2018-07-18 13:58:56	58.50076667	-135.85885833	203	Optimal	0	0	0	1	Good	LFT	2018-09-14	SO-2017.1	0
SO_C_20180718_O_0969.JPG	2018-07-18 13:58:57	58.50076389	-135.85962500	204	Optimal	0	0	0	1	Good	LFT	2018-09-14	SO-2017.1	0
SO_C_20180718_O_0970.JPG	2018-07-18 13:58:58	58.50075833	-135.86039167	205	Optimal	0	0	0	1	Good	LFT	2018-09-14	SO-2017.1	0
SO_C_20180718_O_0971.JPG	2018-07-18 13:58:59	58.50075000	-135.86115833	206	Optimal	0	0	0	1	Good	LFT	2018-09-14	SO-2017.1	0
SO_C_20180718_O_0972.JPG	2018-07-18 13:59:00	58.50074444	-135.86192778	207	Optimal	0	0	0	1	Good	LFT	2018-09-14	SO-2017.1	0
SO_C_20180718_O_0973.JPG	2018-07-18 13:59:01	58.50073611	-135.86270000	208	Optimal	0	0	0	1	Good	LFT	2018-09-14	SO-2017.1	0
SO_C_20180718_O_0974.JPG	2018-07-18 13:59:02	58.50073056	-135.86348056	209	Optimal	0	0	0	1	Good	LFT	2018-09-14	SO-2017.1	0
SO_C_20180718_O_0975.JPG	2018-07-18 13:59:03	58.50072222	-135.86426389	210	Optimal	0	0	0	1	Good	LFT	2018-09-14	SO-2017.1	0
SO_C_20180718_O_0976.JPG	2018-07-18 13:59:04	58.50071667	-135.86505556	211	Optimal	0	0	0	1	Good	LFT	2018-09-14	SO-2017.1	0
SO_C_20180718_O_0977.JPG	2018-07-18 13:59:05	58.50071111	-135.86585000	212	Optimal	0	0	0	1	Good	LFT	2018-09-14	SO-2017.1	0
SO_C_20180718_O_0978.JPG	2018-07-18 13:59:06	58.50070000	-135.86665000	212	Optimal	0	0	0	1	Good	LFT	2018-09-14	SO-2017.1	0
SO_C_20180718_O_0979.JPG	2018-07-18 13:59:07	58.50068889	-135.86745556	212	Optimal	0	0	0	1	Good	LFT	2018-09-14	SO-2017.1	0
SO_C_20180718_O_0980.JPG	2018-07-18 13:59:08	58.50067222	-135.86826111	212	Optimal	0	0	0	1	Good	LFT	2018-09-14	SO-2017.1	0
SO_C_20180718_O_0981.JPG	2018-07-18 13:59:09	58.50065833	-135.86906667	211	Optimal	0	0	0	1	Good	LFT	2018-09-14	SO-2017.1	0
SO_C_20180718_O_0982.JPG	2018-07-18 13:59:10	58.50064167	-135.86987500	210	Optimal	0	0	0	1	Good	LFT	2018-09-14	SO-2017.1	0
SO_C_20180718_O_0983.JPG	2018-07-18 13:59:11	58.50062778	-135.87068056	210	Optimal	0	0	0	1	Good	LFT	2018-09-14	SO-2017.1	0
SO_C_20180718_O_0984.JPG	2018-07-18 13:59:12	58.50061111	-135.87148611	209	Optimal	0	0	0	1	Good	LFT	2018-09-14	SO-2017.1	0
SO_C_20180718_O_0985.JPG	2018-07-18 13:59:13	58.50059444	-135.87228611	208	Optimal	0	0	0	1	Good	LFT	2018-09-14	SO-2017.1	0
SO_C_20180718_O_0986.JPG	2018-07-18 13:59:14	58.50057500	-135.87308611	207	Optimal	0	0	0	1	Good	LFT	2018-09-14	SO-2017.1	0
SO_C_20180718_O_0987.JPG	2018-07-18 13:59:15	58.50055278	-135.87388333	206	Optimal	0	0	0	1	Good	LFT	2018-09-14	SO-2017.1	0
SO_C_20180718_O_0988.JPG	2018-07-18 13:59:16	58.50053333	-135.87468056	205	Optimal	0	0	0	1	Good	LFT	2018-09-14	SO-2017.1	0
SO_C_20180718_O_0989.JPG	2018-07-18 13:59:17	58.50051667	-135.87547222	205	Optimal	0	0	0	1	Good	LFT	2018-09-14	SO-2017.1	0
SO_C_20180718_O_0990.JPG	2018-07-18 13:59:18	58.50050278	-135.87626111	204	Optimal	0	0	0	1	Good	LFT	2018-09-14	SO-2017.1	0
SO_C_20180718_O_0991.JPG	2018-07-18 13:59:19	58.50048889	-135.87705000	204	Optimal	0	0	0	1	Good	LFT	2018-09-14	SO-2017.1	0
SO_C_20180718_O_0992.JPG	2018-07-18 13:59:20	58.50048056	-135.87783333	203	Optimal	0	0	0	1	Good	LFT	2018-09-14	SO-2017.1	0
SO_C_20180718_O_0993.JPG	2018-07-18 13:59:21	58.50047778	-135.87861667	203	Optimal	0	0	0	1	Good	LFT	2018-09-14	SO-2017.1	0
SO_C_20180718_O_0994.JPG	2018-07-18 13:59:22	58.50047778	-135.87940000	203	Optimal	0	0	0	1	Good	LFT	2018-09-14	SO-2017.1	0
SO_C_20180718_O_0995.JPG	2018-07-18 13:59:23	58.50048056	-135.88018333	203	Optimal	0	0	0	1	Good	LFT	2018-09-14	SO-2017.1	0
SO_C_20180718_O_0996.JPG	2018-07-18 13:59:24	58.50048333	-135.88096389	203	Optimal	0	0	0	1	Good	LFT	2018-09-14	SO-2017.1	0
SO_C_20180718_O_0997.JPG	2018-07-18 13:59:25	58.50048889	-135.88174444	203	Optimal	0	0	0	1	Good	LFT	2018-09-14	SO-2017.1	0
SO_C_20180718_O_0998.JPG	2018-07-18 13:59:26	58.50049444	-135.88252500	203	Optimal	0	0	0	1	Good	LFT	2018-09-14	SO-2017.1	0
SO_C_20180718_O_0999.JPG	2018-07-18 13:59:27	58.50050000	-135.88330278	204	Optimal	0	0	0	0	Good	LFT	2018-09-14	SO-2017.1	0
SO_C_20180718_O_1000.JPG	2018-07-18 13:59:28	58.50050278	-135.88408056	204	Optimal	0	0	0	0	Good	LFT	2018-09-14	SO-2017.1	0
SO_C_20180718_O_1001.JPG	2018-07-18 13:59:29	58.50050278	-135.88485833	204	Optimal	0	0	0	0	Good	LFT	2018-09-14	SO-2017.1	0
SO_C_20180718_O_1002.JPG	2018-07-18 13:59:30	58.50050000	-135.88563611	204	Optimal	0	0	1	0	Good	LFT	2018-09-14	SO-2017.1	0
SO_C_20180718_O_1003.JPG	2018-07-18 13:59:31	58.50050000	-135.88641389	205	Optimal	0	0	0	0	Good	LFT	2018-09-14	SO-2017.1	0
SO_C_20180718_O_1004.JPG	2018-07-18 13:59:32	58.50049722	-135.88718889	205	Optimal	0	0	0	0	Good	LFT	2018-09-14	SO-2017.1	0
SO_C_20180718_O_1005.JPG	2018-07-18 13:59:33	58.50049444	-135.88797222	206	Optimal	0	0	0	0	Good	LFT	2018-09-14	SO-2017.1	0
SO_C_20180718_O_1006.JPG	2018-07-18 13:59:34	58.50049444	-135.88875833	207	Optimal	0	0	0	1	Good	LFT	2018-09-14	SO-2017.1	0
SO_C_20180718_O_1007.JPG	2018-07-18 13:59:35	58.50048889	-135.88954722	208	Optimal	0	0	0	1	Good	LFT	2018-09-14	SO-2017.1	0
SO_C_20180718_O_1008.JPG	2018-07-18 13:59:36	58.50048056	-135.89034167	209	Optimal	0	0	0	1	Good	LFT	2018-09-14	SO-2017.1	0
SO_C_20180718_O_1009.JPG	2018-07-18 13:59:37	58.50046944	-135.89114167	210	Optimal	0	0	0	1	Good	LFT	2018-09-14	SO-2017.1	0
SO_C_20180718_O_1010.JPG	2018-07-18 13:59:38	58.50045278	-135.89194444	210	Optimal	0	0	0	1	Good	LFT	2018-09-14	SO-2017.1	0
SO_C_20180718_O_1011.JPG	2018-07-18 13:59:39	58.50043333	-135.89275278	210	Optimal	0	0	0	1	Good	LFT	2018-09-14	SO-2017.1	0
SO_C_20180718_O_1012.JPG	2018-07-18 13:59:40	58.50041389	-135.89356389	210	Optimal	0	0	0	1	Good	LFT	2018-09-14	SO-2017.1	0
SO_C_20180718_O_1013.JPG	2018-07-18 13:59:41	58.50039722	-135.89437222	210	Optimal	0	0	0	1	Good	LFT	2018-09-14	SO-2017.1	0
SO_C_20180718_O_1014.JPG	2018-07-18 13:59:42	58.50037500	-135.89517778	210	Optimal	0	0	0	1	Good	LFT	2018-09-14	SO-2017.1	0
SO_C_20180718_O_1015.JPG	2018-07-18 13:59:43	58.50035278	-135.89598611	210	Optimal	0	0	0	1	Good	LFT	2018-09-14	SO-2017.1	0
SO_C_20180718_O_1016.JPG	2018-07-18 13:59:44	58.50032778	-135.89678889	210	Optimal	0	0	0	1	Good	LFT	2018-09-14	SO-2017.1	0
SO_C_20180718_O_1017.JPG	2018-07-18 13:59:45	58.50030278	-135.89759167	210	Optimal	0	0	1	1	Good	LFT	2018-09-14	SO-2017.1	0
SO_C_20180718_O_1018.JPG	2018-07-18 13:59:46	58.50027778	-135.89839167	210	Optimal	0	0	0	0	Good	LFT	2018-09-14	SO-2017.1	0
SO_C_20180718_O_1019.JPG	2018-07-18 13:59:47	58.50025278	-135.89918611	210	Optimal	0	0	0	0	Good	LFT	2018-09-14	SO-2017.1	0
SO_C_20180718_O_1020.JPG	2018-07-18 13:59:48	58.50023056	-135.89998333	211	Optimal	0	0	0	0	Good	LFT	2018-09-14	SO-2017.1	0
SO_C_20180718_O_1021.JPG	2018-07-18 13:59:49	58.50020833	-135.90078333	211	Optimal	0	0	0	0	Good	LFT	2018-09-14	SO-2017.1	0
SO_C_20180718_O_1022.JPG	2018-07-18 13:59:50	58.50018889	-135.90158333	212	Optimal	0	0	0	0	Good	LFT	2018-09-14	SO-2017.1	0
SO_C_20180718_O_1023.JPG	2018-07-18 13:59:51	58.50017222	-135.90238611	213	Optimal	0	0	0	0	Good	LFT	2018-09-14	SO-2017.1	0
SO_C_20180718_O_1024.JPG	2018-07-18 13:59:52	58.50015833	-135.90319167	213	Optimal	0	0	1	0	Good	LFT	2018-09-14	SO-2017.1	0
SO_C_20180718_O_1025.JPG	2018-07-18 13:59:53	58.50015000	-135.90400000	214	Optimal	0	0	1	0	Good	LFT	2018-09-14	SO-2017.1	0
SO_C_20180718_O_1026.JPG	2018-07-18 13:59:54	58.50013889	-135.90480556	215	Optimal	0	0	0	0	Good	LFT	2018-09-14	SO-2017.1	0
SO_C_20180718_O_1027.JPG	2018-07-18 13:59:55	58.50013056	-135.90561389	215	Optimal	0	0	0	0	Good	LFT	2018-09-14	SO-2017.1	0
SO_C_20180718_O_1028.JPG	2018-07-18 13:59:56	58.50011944	-135.90642222	215	Optimal	0	0	0	0	Good	LFT	2018-09-14	SO-2017.1	0
SO_C_20180718_O_1029.JPG	2018-07-18 13:59:57	58.50011111	-135.90723056	215	Optimal	0	0	0	0	Good	LFT	2018-09-14	SO-2017.1	0
SO_C_20180718_O_1030.JPG	2018-07-18 13:59:58	58.50010833	-135.90803889	216	Optimal	0	0	0	0	Good	LFT	2018-09-14	SO-2017.1	0
SO_C_20180718_O_1031.JPG	2018-07-18 13:59:59	58.50010278	-135.90885000	216	Optimal	0	0	0	0	Good	LFT	2018-09-14	SO-2017.1	0
SO_C_20180718_O_1032.JPG	2018-07-18 14:00:00	58.50009722	-135.90966389	216	Optimal	0	0	0	0	Good	LFT	2018-09-14	SO-2017.1	0
SO_C_20180718_O_1033.JPG	2018-07-18 14:00:01	58.50009167	-135.91047500	216	Optimal	0	0	0	0	Good	LFT	2018-09-14	SO-2017.1	0
SO_C_20180718_O_1034.JPG	2018-07-18 14:00:02	58.50008889	-135.91128889	216	Optimal	0	0	0	0	Good	LFT	2018-09-14	SO-2017.1	0
SO_C_20180718_O_1035.JPG	2018-07-18 14:00:03	58.50008611	-135.91210000	216	Optimal	0	0	0	0	Good	LFT	2018-09-14	SO-2017.1	0
SO_C_20180718_O_1036.JPG	2018-07-18 14:00:04	58.50008889	-135.91290833	217	Optimal	0	0			Good	LFT	2018-09-14	SO-2017.1	0
SO_C_20180718_O_1037.JPG	2018-07-18 14:00:05	58.50008889	-135.91371667	217	Optimal	0	0	1	0	Good	LFT	2018-09-14	SO-2017.1	0
SO_C_20180718_O_1038.JPG	2018-07-18 14:00:06	58.50008889	-135.91452778	217	Optimal	0	0	1	0	Good	LFT	2018-09-14	SO-2017.1	0
SO_C_20180718_O_1039.JPG	2018-07-18 14:00:07	58.50009444	-135.91533611	217	Optimal	0	0	1	0	Good	LFT	2018-09-14	SO-2017.1	0
SO_C_20180718_O_1040.JPG	2018-07-18 14:00:08	58.50010278	-135.91614444	218	Optimal	0	0	1	0	Good	LFT	2018-09-14	SO-2017.1	0
SO_C_20180718_O_1041.JPG	2018-07-18 14:00:09	58.50010833	-135.91695833	218	Optimal	0	0	1	0	Good	LFT	2018-09-14	SO-2017.1	0
SO_C_20180718_O_1042.JPG	2018-07-18 14:00:10	58.50011389	-135.91777778	219	Optimal	0	0	1	0	Good	LFT	2018-09-17	SO-2017.1	0
SO_C_20180718_O_1043.JPG	2018-07-18 14:00:11	58.50011944	-135.91859444	219	Optimal	0	0	1	0	Good	LFT	2018-09-17	SO-2017.1	0
SO_C_20180718_O_1044.JPG	2018-07-18 14:00:12	58.50012500	-135.91941389	219	Optimal	0	0	1	0	Good	LFT	2018-09-17	SO-2017.1	0
SO_C_20180718_O_1045.JPG	2018-07-18 14:00:13	58.50012778	-135.92023889	219	Optimal	0	0	1	0	Good	LFT	2018-09-17	SO-2017.1	0
SO_C_20180718_O_1046.JPG	2018-07-18 14:00:14	58.50013056	-135.92106389	219	Optimal	0	0	1	0	Good	LFT	2018-09-17	SO-2017.1	0
SO_C_20180718_O_1047.JPG	2018-07-18 14:00:15	58.50013056	-135.92189444	219	Optimal	0	0	1	0	Good	LFT	2018-09-17	SO-2017.1	0
SO_C_20180718_O_1048.JPG	2018-07-18 14:00:16	58.50012778	-135.92272222	219	Optimal	0	0	1	0	Good	LFT	2018-09-17	SO-2017.1	0
SO_C_20180718_O_1049.JPG	2018-07-18 14:00:17	58.50012222	-135.92355278	219	Optimal	0	0	1	0	Good	LFT	2018-09-17	SO-2017.1	0
SO_C_20180718_O_1050.JPG	2018-07-18 14:00:18	58.50011111	-135.92438056	219	Optimal	0	0	0	0	Good	LFT	2018-09-17	SO-2017.1	0
SO_C_20180718_O_1051.JPG	2018-07-18 14:00:19	58.50010000	-135.92521111	218	Optimal	0	0	0	0	Good	LFT	2018-09-17	SO-2017.1	0
SO_C_20180718_O_1052.JPG	2018-07-18 14:00:20	58.50008889	-135.92603611	218	Optimal	0	0	1	0	Good	LFT	2018-09-17	SO-2017.1	0
SO_C_20180718_O_1053.JPG	2018-07-18 14:00:21	58.50007778	-135.92686389	218	Optimal	0	0	1	0	Good	LFT	2018-09-17	SO-2017.1	0
SO_C_20180718_O_1054.JPG	2018-07-18 14:00:22	58.50006389	-135.92768889	217	Optimal	0	0	1	0	Good	LFT	2018-09-17	SO-2017.1	0
SO_C_20180718_O_1055.JPG	2018-07-18 14:00:23	58.50005278	-135.92851667	217	Optimal	0	0	1	0	Good	LFT	2018-09-17	SO-2017.1	0
SO_C_20180718_O_1056.JPG	2018-07-18 14:00:24	58.50003611	-135.92934444	217	Optimal	0	0	1	0	Good	LFT	2018-09-17	SO-2017.1	0
SO_C_20180718_O_1057.JPG	2018-07-18 14:00:25	58.50003056	-135.93016944	217	Optimal	0	0	1	0	Good	LFT	2018-09-17	SO-2017.1	0
SO_C_20180718_O_1058.JPG	2018-07-18 14:00:26	58.50002778	-135.93099444	217	Optimal	0	0	1	0	Good	LFT	2018-09-17	SO-2017.1	0
SO_C_20180718_O_1059.JPG	2018-07-18 14:00:27	58.50002500	-135.93182222	217	Optimal	0	0	1	0	Good	LFT	2018-09-17	SO-2017.1	0
SO_C_20180718_O_1060.JPG	2018-07-18 14:00:28	58.50002222	-135.93264722	217	Optimal	0	0	1	0	Good	LFT	2018-09-17	SO-2017.1	0
SO_C_20180718_O_1061.JPG	2018-07-18 14:00:29	58.50001944	-135.93347500	217	Optimal	0	0	1	0	Good	LFT	2018-09-17	SO-2017.1	0
SO_C_20180718_O_1062.JPG	2018-07-18 14:00:30	58.50001667	-135.93430000	217	Optimal	0	0	1	0	Good	LFT	2018-09-17	SO-2017.1	0
SO_C_20180718_O_1063.JPG	2018-07-18 14:00:31	58.50001111	-135.93512778	217	Optimal	0	0	1	1	Good	LFT	2018-09-17	SO-2017.1	0
SO_C_20180718_O_1064.JPG	2018-07-18 14:00:32	58.50000278	-135.93595833	217	Optimal	0	0	1	0	Good	LFT	2018-09-17	SO-2017.1	0
SO_C_20180718_O_1065.JPG	2018-07-18 14:00:33	58.49999444	-135.93679167	217	Optimal	0	0	1	1	Good	LFT	2018-09-17	SO-2017.1	0
SO_C_20180718_O_1066.JPG	2018-07-18 14:00:34	58.49998611	-135.93763056	217	Optimal	0	0	1	0	Good	LFT	2018-09-17	SO-2017.1	0
SO_C_20180718_O_1067.JPG	2018-07-18 14:00:35	58.49997500	-135.93847222	217	Optimal	0	0	1	1	Good	LFT	2018-09-17	SO-2017.1	0
SO_C_20180718_O_1068.JPG	2018-07-18 14:00:36	58.49996389	-135.93931667	216	Optimal	0	0	1	0	Good	LFT	2018-09-17	SO-2017.1	0
SO_C_20180718_O_1069.JPG	2018-07-18 14:00:37	58.49995000	-135.94016111	216	Optimal	0	0	1	0	Good	LFT	2018-09-17	SO-2017.1	0
SO_C_20180718_O_1070.JPG	2018-07-18 14:00:38	58.49993611	-135.94100278	215	Optimal	0	0	1	0	Good	LFT	2018-09-17	SO-2017.1	0
SO_C_20180718_O_1071.JPG	2018-07-18 14:00:39	58.49992500	-135.94184167	214	Optimal	0	0	1	0	Good	LFT	2018-09-17	SO-2017.1	0
SO_C_20180718_O_1072.JPG	2018-07-18 14:00:40	58.49991111	-135.94268056	213	Optimal	0	0	1	0	Good	LFT	2018-09-17	SO-2017.1	0
SO_C_20180718_O_1073.JPG	2018-07-18 14:00:41	58.49989722	-135.94351389	212	Optimal	0	0	1	0	Good	LFT	2018-09-17	SO-2017.1	0
SO_C_20180718_O_1074.JPG	2018-07-18 14:00:42	58.49988333	-135.94434444	212	Optimal	0	0	1	0	Good	LFT	2018-09-17	SO-2017.1	0
SO_C_20180718_O_1075.JPG	2018-07-18 14:00:43	58.49986944	-135.94516944	212	Optimal	0	0	1	0	Good	LFT	2018-09-17	SO-2017.1	0
SO_C_20180718_O_1076.JPG	2018-07-18 14:00:44	58.49985556	-135.94599444	211	Optimal	0	0	1	0	Good	LFT	2018-09-17	SO-2017.1	0
SO_C_20180718_O_1077.JPG	2018-07-18 14:00:45	58.49984444	-135.94681944	211	Optimal	0	0	1	0	Good	LFT	2018-09-17	SO-2017.1	0
SO_C_20180718_O_1078.JPG	2018-07-18 14:00:46	58.49983611	-135.94764167	212	Optimal	0	0	1	0	Good	LFT	2018-09-17	SO-2017.1	0
SO_C_20180718_O_1079.JPG	2018-07-18 14:00:47	58.49982778	-135.94846667	212	Optimal	0	0	1	0	Good	LFT	2018-09-17	SO-2017.1	0
SO_C_20180718_O_1080.JPG	2018-07-18 14:00:48	58.49982222	-135.94929444	213	Optimal	0	0	1	1	Good	LFT	2018-09-17	SO-2017.1	0
SO_C_20180718_O_1081.JPG	2018-07-18 14:00:49	58.49981944	-135.95012222	213	Optimal	0	0	0	1	Good	LFT	2018-09-17	SO-2017.1	0
SO_C_20180718_O_1082.JPG	2018-07-18 14:00:50	58.49981944	-135.95095278	214	Optimal	0	0	0	1	Good	LFT	2018-09-17	SO-2017.1	0
SO_C_20180718_O_1083.JPG	2018-07-18 14:00:51	58.49981944	-135.95178611	214	Optimal	0	0	0	1	Good	LFT	2018-09-17	SO-2017.1	0
SO_C_20180718_O_1084.JPG	2018-07-18 14:00:52	58.49981944	-135.95262222	214	Optimal	0	0	0	1	Good	LFT	2018-09-17	SO-2017.1	0
SO_C_20180718_O_1085.JPG	2018-07-18 14:00:53	58.49982222	-135.95345556	214	Optimal	0	0	0	1	Good	LFT	2018-09-17	SO-2017.1	0
SO_C_20180718_O_1086.JPG	2018-07-18 14:00:54	58.49982222	-135.95429167	214	Optimal	0	0	0	1	Good	LFT	2018-09-17	SO-2017.1	0
SO_C_20180718_O_1087.JPG	2018-07-18 14:00:55	58.49982222	-135.95512500	214	Optimal	0	0	0	1	Good	LFT	2018-09-17	SO-2017.1	0
SO_C_20180718_O_1088.JPG	2018-07-18 14:00:56	58.49982222	-135.95595556	214	Optimal	0	0	1	1	Good	LFT	2018-09-17	SO-2017.1	0
SO_C_20180718_O_1089.JPG	2018-07-18 14:00:57	58.49982222	-135.95678889	213	Optimal	0	0	1	1	Good	LFT	2018-09-17	SO-2017.1	0
SO_C_20180718_O_1090.JPG	2018-07-18 14:00:58	58.49981944	-135.95762222	213	Optimal	0	0	1	1	Good	LFT	2018-09-17	SO-2017.1	0
SO_C_20180718_O_1091.JPG	2018-07-18 14:00:59	58.49981667	-135.95844722	212	Optimal	1	0	1	0	Good	LFT	2018-09-17	SO-2017.1	0
SO_C_20180718_O_1092.JPG	2018-07-18 14:01:00	58.49981111	-135.95926944	212	Optimal	0	0	1	1	Good	LFT	2018-09-17	SO-2017.1	0
SO_C_20180718_O_1093.JPG	2018-07-18 14:01:01	58.49981111	-135.96008889	212	Optimal	0	0	1	1	Good	LFT	2018-09-17	SO-2017.1	0
SO_C_20180718_O_1094.JPG	2018-07-18 14:01:02	58.49981111	-135.96090556	212	Optimal	0	0	1	1	Good	LFT	2018-09-17	SO-2017.1	0
SO_C_20180718_O_1095.JPG	2018-07-18 14:01:03	58.49981389	-135.96171667	212	Optimal	0	0	1	1	Good	LFT	2018-09-17	SO-2017.1	0
SO_C_20180718_O_1096.JPG	2018-07-18 14:01:04	58.49981944	-135.96252778	212	Optimal	0	0	1	1	Good	LFT	2018-09-17	SO-2017.1	0
SO_C_20180718_O_1097.JPG	2018-07-18 14:01:05	58.49983056	-135.96333611	212	Optimal	0	0	1	1	Good	LFT	2018-09-17	SO-2017.1	0
SO_C_20180718_O_1098.JPG	2018-07-18 14:01:06	58.49983611	-135.96414167	212	Optimal	0	0	1	1	Good	LFT	2018-09-17	SO-2017.1	0
SO_C_20180718_O_1099.JPG	2018-07-18 14:01:07	58.49984444	-135.96495000	212	Optimal	0	0	1	1	Good	LFT	2018-09-17	SO-2017.1	0
SO_C_20180718_O_1100.JPG	2018-07-18 14:01:08	58.49985556	-135.96575278	213	Optimal	0	0	1	0	Good	LFT	2018-09-17	SO-2017.1	0
SO_C_20180718_O_1101.JPG	2018-07-18 14:01:09	58.49986389	-135.96655833	213	Optimal	0	0	0	0	Good	LFT	2018-09-17	SO-2017.1	0
SO_C_20180718_O_1102.JPG	2018-07-18 14:01:10	58.49987222	-135.96736111	213	Optimal	0	0	0	0	Good	LFT	2018-09-17	SO-2017.1	0
SO_C_20180718_O_1103.JPG	2018-07-18 14:01:11	58.49987778	-135.96816389	213	Optimal	0	0	0	0	Good	LFT	2018-09-17	SO-2017.1	0
SO_C_20180718_O_1104.JPG	2018-07-18 14:01:12	58.49987778	-135.96896944	214	Optimal	0	0	0	0	Good	LFT	2018-09-17	SO-2017.1	0
SO_C_20180718_O_1105.JPG	2018-07-18 14:01:13	58.49987500	-135.96977500	214	Optimal	0	0	0	0	Good	LFT	2018-09-17	SO-2017.1	0
SO_C_20180718_O_1106.JPG	2018-07-18 14:01:14	58.49987222	-135.97057778	214	Optimal	0	0	1	0	Good	LFT	2018-09-17	SO-2017.1	0
SO_C_20180718_O_1107.JPG	2018-07-18 14:01:15	58.49986389	-135.97138333	214	Optimal	0	0	0	0	Good	LFT	2018-09-17	SO-2017.1	0
SO_C_20180718_O_1108.JPG	2018-07-18 14:01:16	58.49985000	-135.97218889	214	Optimal	0	0	0	0	Good	LFT	2018-09-17	SO-2017.1	0
SO_C_20180718_O_1109.JPG	2018-07-18 14:01:17	58.49983056	-135.97299444	214	Optimal	0	0	0	0	Good	LFT	2018-09-17	SO-2017.1	0
SO_C_20180718_O_1110.JPG	2018-07-18 14:01:18	58.49981111	-135.97380000	214	Optimal	0	0	0	0	Good	LFT	2018-09-17	SO-2017.1	0
SO_C_20180718_O_1111.JPG	2018-07-18 14:01:19	58.49978611	-135.97460556	214	Optimal	0	0	0	0	Good	LFT	2018-09-17	SO-2017.1	0
SO_C_20180718_O_1112.JPG	2018-07-18 14:01:20	58.49976111	-135.97541389	214	Optimal	0	0	0	0	Good	LFT	2018-09-17	SO-2017.1	0
SO_C_20180718_O_1113.JPG	2018-07-18 14:01:21	58.49973333	-135.97622778	214	Optimal	0	0	0	0	Good	LFT	2018-09-17	SO-2017.1	0
SO_C_20180718_O_1114.JPG	2018-07-18 14:01:22	58.49970556	-135.97704167	214	Optimal	0	0	0	0	Good	LFT	2018-09-17	SO-2017.1	0
SO_C_20180718_O_1115.JPG	2018-07-18 14:01:23	58.49967500	-135.97785833	214	Optimal	0	0	1	0	Good	LFT	2018-09-17	SO-2017.1	0
SO_C_20180718_O_1116.JPG	2018-07-18 14:01:24	58.49964722	-135.97867500	214	Optimal	0	0	1	0	Good	LFT	2018-09-17	SO-2017.1	0
SO_C_20180718_O_1117.JPG	2018-07-18 14:01:25	58.49961944	-135.97949444	214	Optimal	0	0	0	0	Good	LFT	2018-09-17	SO-2017.1	0
SO_C_20180718_O_1118.JPG	2018-07-18 14:01:26	58.49959167	-135.98031389	213	Optimal	0	0	0	0	Good	LFT	2018-09-17	SO-2017.1	0
SO_C_20180718_O_1119.JPG	2018-07-18 14:01:27	58.49956111	-135.98113333	213	Optimal	0	0	0	0	Good	LFT	2018-09-17	SO-2017.1	0
SO_C_20180718_O_1120.JPG	2018-07-18 14:01:28	58.49953056	-135.98195278	213	Optimal	0	0	0	0	Good	LFT	2018-09-17	SO-2017.1	0
SO_C_20180718_O_1121.JPG	2018-07-18 14:01:29	58.49950000	-135.98276944	213	Optimal	0	0	0	0	Good	LFT	2018-09-17	SO-2017.1	0
SO_C_20180718_O_1122.JPG	2018-07-18 14:01:30	58.49947778	-135.98359167	212	Optimal	0	0	1	0	Good	LFT	2018-09-17	SO-2017.1	0
SO_C_20180718_O_1123.JPG	2018-07-18 14:01:31	58.49945833	-135.98441111	212	Optimal	0	0	1	0	Good	LFT	2018-09-17	SO-2017.1	0
SO_C_20180718_O_1124.JPG	2018-07-18 14:01:32	58.49945278	-135.98522778	212	Optimal	0	0	0	0	Good	LFT	2018-09-17	SO-2017.1	0
SO_C_20180718_O_1125.JPG	2018-07-18 14:01:33	58.49944722	-135.98604167	211	Optimal	0	0	0	0	Good	LFT	2018-09-17	SO-2017.1	0
SO_C_20180718_O_1126.JPG	2018-07-18 14:01:34	58.49944444	-135.98685556	211	Optimal	0	0	0	0	Good	LFT	2018-09-17	SO-2017.1	0
SO_C_20180718_O_1127.JPG	2018-07-18 14:01:35	58.49944722	-135.98766667	211	Optimal	0	0	0	0	Good	LFT	2018-09-17	SO-2017.1	0
SO_C_20180718_O_1128.JPG	2018-07-18 14:01:36	58.49945278	-135.98847500	211	Optimal	0	0	0	0	Good	LFT	2018-09-17	SO-2017.1	0
SO_C_20180718_O_1129.JPG	2018-07-18 14:01:37	58.49946389	-135.98928056	211	Optimal	1	0	1	0	Good	LFT	2018-09-17	SO-2017.1	0
SO_C_20180718_O_1130.JPG	2018-07-18 14:01:38	58.49947500	-135.99008611	211	Optimal	0	0	1	0	Good	LFT	2018-09-17	SO-2017.1	0
SO_C_20180718_O_1131.JPG	2018-07-18 14:01:39	58.49948889	-135.99088889	211	Optimal	0	0	1	0	Good	LFT	2018-09-17	SO-2017.1	0
SO_C_20180718_O_1132.JPG	2018-07-18 14:01:40	58.49950556	-135.99169444	211	Optimal	0	0	0	0	Good	LFT	2018-09-17	SO-2017.1	0
SO_C_20180718_O_1133.JPG	2018-07-18 14:01:41	58.49952222	-135.99250000	212	Optimal	0	0	1	0	Good	LFT	2018-09-17	SO-2017.1	0
SO_C_20180718_O_1134.JPG	2018-07-18 14:01:42	58.49954167	-135.99330833	212	Optimal	0	0	0	0	Good	LFT	2018-09-17	SO-2017.1	0
SO_C_20180718_O_1135.JPG	2018-07-18 14:01:43	58.49956111	-135.99411667	213	Optimal	0	0	1	0	Good	LFT	2018-09-17	SO-2017.1	0
SO_C_20180718_O_1136.JPG	2018-07-18 14:01:44	58.49957778	-135.99493056	213	Optimal	0	0	1	0	Good	LFT	2018-09-17	SO-2017.1	0
SO_C_20180718_O_1137.JPG	2018-07-18 14:01:45	58.49959444	-135.99574444	213	Optimal	0	0	1	0	Good	LFT	2018-09-17	SO-2017.1	0
SO_C_20180718_O_1138.JPG	2018-07-18 14:01:46	58.49960556	-135.99656111	214	Optimal	0	0	1	0	Good	LFT	2018-09-17	SO-2017.1	0
SO_C_20180718_O_1139.JPG	2018-07-18 14:01:47	58.49961667	-135.99738056	214	Optimal	0	0	0	0	Good	LFT	2018-09-17	SO-2017.1	0
SO_C_20180718_O_1140.JPG	2018-07-18 14:01:48	58.49961944	-135.99820000	214	Optimal	0	0	0	0	Good	LFT	2018-09-17	SO-2017.1	0
SO_C_20180718_O_1141.JPG	2018-07-18 14:01:49	58.49961944	-135.99902222	213	Optimal	0	0	0	0	Good	LFT	2018-09-17	SO-2017.1	0
SO_C_20180718_O_1142.JPG	2018-07-18 14:01:50	58.49961389	-135.99984722	213	Optimal	0	0	0	0	Good	LFT	2018-09-17	SO-2017.1	0
SO_C_20180718_O_1143.JPG	2018-07-18 14:01:51	58.49960556	-136.00066667	213	Optimal	0	0	0	0	Good	LFT	2018-09-17	SO-2017.1	0
SO_C_20180718_O_1144.JPG	2018-07-18 14:01:52	58.49959167	-136.00148611	213	Optimal	0	0	0	0	Good	LFT	2018-09-17	SO-2017.1	0
SO_C_20180718_O_1145.JPG	2018-07-18 14:01:53	58.49957500	-136.00230833	212	Optimal	0	0	0	0	Good	LFT	2018-09-17	SO-2017.1	0
SO_C_20180718_O_1146.JPG	2018-07-18 14:01:54	58.49955833	-136.00313056	212	Optimal	0	0	0	0	Good	LFT	2018-09-17	SO-2017.1	0
SO_C_20180718_O_1147.JPG	2018-07-18 14:01:55	58.49954167	-136.00395278	212	Optimal	0	0	0	0	Good	LFT	2018-09-17	SO-2017.1	0
SO_C_20180718_O_1148.JPG	2018-07-18 14:01:56	58.49951944	-136.00477500	212	Optimal	0	0	0	0	Good	LFT	2018-09-17	SO-2017.1	0
SO_C_20180718_O_1149.JPG	2018-07-18 14:01:57	58.49950000	-136.00559444	212	Optimal	0	0	0	0	Good	LFT	2018-09-17	SO-2017.1	0
SO_C_20180718_O_1150.JPG	2018-07-18 14:01:58	58.49948056	-136.00641389	212	Optimal	0	0	0	0	Good	LFT	2018-09-17	SO-2017.1	0
SO_C_20180718_O_1151.JPG	2018-07-18 14:01:59	58.49946111	-136.00723056	212	Optimal	0	0	0	0	Good	LFT	2018-09-17	SO-2017.1	0
SO_C_20180718_O_1152.JPG	2018-07-18 14:02:00	58.49944722	-136.00804722	212	Optimal	0	0	0	0	Good	LFT	2018-09-17	SO-2017.1	0
SO_C_20180718_O_1153.JPG	2018-07-18 14:02:01	58.49943333	-136.00886389	212	Optimal	0	0	1	0	Good	LFT	2018-09-17	SO-2017.1	0
SO_C_20180718_O_1154.JPG	2018-07-18 14:02:02	58.49942778	-136.00968056	212	Optimal	0	0	1	0	Good	LFT	2018-09-17	SO-2017.1	0
SO_C_20180718_O_1155.JPG	2018-07-18 14:02:03	58.49941944	-136.01049722	212	Optimal	0	0	0	0	Good	LFT	2018-09-17	SO-2017.1	0
SO_C_20180718_O_1156.JPG	2018-07-18 14:02:04	58.49941667	-136.01131389	213	Optimal	0	0	0	0	Good	LFT	2018-09-17	SO-2017.1	0
SO_C_20180718_O_1157.JPG	2018-07-18 14:02:05	58.49941111	-136.01213333	213	Optimal	0	0	0	0	Good	LFT	2018-09-17	SO-2017.1	0
SO_C_20180718_O_1158.JPG	2018-07-18 14:02:06	58.49940556	-136.01295556	214	Optimal	0	0	0	0	Good	LFT	2018-09-17	SO-2017.1	0
SO_C_20180718_O_1159.JPG	2018-07-18 14:02:07	58.49940278	-136.01378056	214	Optimal	0	0	0	0	Good	LFT	2018-09-17	SO-2017.1	0
SO_C_20180718_O_1160.JPG	2018-07-18 14:02:08	58.49939722	-136.01460833	214	Optimal	0	0	0	0	Good	LFT	2018-09-17	SO-2017.1	0
SO_C_20180718_O_1161.JPG	2018-07-18 14:02:09	58.49939167	-136.01543889	214	Optimal	0	0	0	0	Good	LFT	2018-09-17	SO-2017.1	0
SO_C_20180718_O_1162.JPG	2018-07-18 14:02:10	58.49938611	-136.01627222	214	Optimal	0	0	0	0	Good	LFT	2018-09-17	SO-2017.1	0
SO_C_20180718_O_1163.JPG	2018-07-18 14:02:11	58.49937778	-136.01710556	213	Optimal	0	0	0	0	Good	LFT	2018-09-17	SO-2017.1	0
SO_C_20180718_O_1164.JPG	2018-07-18 14:02:12	58.49936944	-136.01793611	213	Optimal	0	0	1	0	Good	LFT	2018-09-17	SO-2017.1	0
SO_C_20180718_O_1165.JPG	2018-07-18 14:02:13	58.49935556	-136.01876667	212	Optimal	0	0	0	0	Good	LFT	2018-09-17	SO-2017.1	0
SO_C_20180718_O_1166.JPG	2018-07-18 14:02:14	58.49934167	-136.01959722	212	Optimal	0	0	0	0	Good	LFT	2018-09-17	SO-2017.1	0
SO_C_20180718_O_1167.JPG	2018-07-18 14:02:15	58.49932500	-136.02042222	211	Optimal	0	0	0	0	Good	LFT	2018-09-17	SO-2017.1	0
SO_C_20180718_O_1168.JPG	2018-07-18 14:02:16	58.49931111	-136.02124444	210	Optimal	0	0	1	0	Good	LFT	2018-09-17	SO-2017.1	0
SO_C_20180718_O_1169.JPG	2018-07-18 14:02:17	58.49929722	-136.02206667	210	Optimal	0	0	1	0	Good	LFT	2018-09-17	SO-2017.1	0
SO_C_20180718_O_1170.JPG	2018-07-18 14:02:18	58.49928889	-136.02288611	210	Optimal	0	0	1	0	Good	LFT	2018-09-17	SO-2017.1	0
SO_C_20180718_O_1171.JPG	2018-07-18 14:02:19	58.49928333	-136.02370556	210	Optimal	0	0	1	0	Good	LFT	2018-09-17	SO-2017.1	0
SO_C_20180718_O_1172.JPG	2018-07-18 14:02:20	58.49928333	-136.02452778	210	Optimal	0	0	0	0	Good	LFT	2018-09-17	SO-2017.1	0
SO_C_20180718_O_1173.JPG	2018-07-18 14:02:21	58.49928333	-136.02535278	210	Optimal	0	0	0	0	Good	LFT	2018-09-17	SO-2017.1	0
SO_C_20180718_O_1174.JPG	2018-07-18 14:02:22	58.49928889	-136.02618056	210	Optimal	0	0	0	0	Good	LFT	2018-09-17	SO-2017.1	0
SO_C_20180718_O_1175.JPG	2018-07-18 14:02:23	58.49929444	-136.02700556	210	Optimal	0	0	0	0	Good	LFT	2018-09-17	SO-2017.1	0
SO_C_20180718_O_1176.JPG	2018-07-18 14:02:24	58.49930278	-136.02783333	210	Optimal	0	0	0	0	Good	LFT	2018-09-17	SO-2017.1	0
SO_C_20180718_O_1177.JPG	2018-07-18 14:02:25	58.49931111	-136.02866389	210	Optimal	0	0	0	0	Good	LFT	2018-09-17	SO-2017.1	0
SO_C_20180718_O_1178.JPG	2018-07-18 14:02:26	58.49932500	-136.02949444	210	Optimal	0	0	0	0	Good	LFT	2018-09-17	SO-2017.1	0
SO_C_20180718_O_1179.JPG	2018-07-18 14:02:27	58.49933611	-136.03032500	210	Optimal	0	0	0	0	Good	LFT	2018-09-17	SO-2017.1	0
SO_C_20180718_O_1180.JPG	2018-07-18 14:02:28	58.49934444	-136.03115556	209	Optimal	0	0	0	0	Good	LFT	2018-09-17	SO-2017.1	0
SO_C_20180718_O_1181.JPG	2018-07-18 14:02:29	58.49935278	-136.03198889	208	Optimal	0	0	0	0	Good	LFT	2018-09-17	SO-2017.1	0
SO_C_20180718_O_1182.JPG	2018-07-18 14:02:30	58.49935833	-136.03282222	208	Optimal	0	0	0	0	Good	LFT	2018-09-17	SO-2017.1	0
SO_C_20180718_O_1183.JPG	2018-07-18 14:02:31	58.49935833	-136.03365833	207	Optimal	0	0	0	0	Good	LFT	2018-09-17	SO-2017.1	0
SO_C_20180718_O_1184.JPG	2018-07-18 14:02:32	58.49935556	-136.03449167	207	Optimal	0	0	0	0	Good	LFT	2018-09-17	SO-2017.1	0
SO_C_20180718_O_1185.JPG	2018-07-18 14:02:33	58.49935278	-136.03532500	206	Optimal	0	0	0	0	Good	LFT	2018-09-17	SO-2017.1	0
SO_C_20180718_O_1186.JPG	2018-07-18 14:02:34	58.49935000	-136.03615278	205	Optimal	0	0	0	0	Good	LFT	2018-09-17	SO-2017.1	0
SO_C_20180718_O_1187.JPG	2018-07-18 14:02:35	58.49934722	-136.03697778	205	Optimal	0	0	0	0	Good	LFT	2018-09-17	SO-2017.1	0
SO_C_20180718_O_1188.JPG	2018-07-18 14:02:36	58.49934444	-136.03780556	204	Optimal	0	0	0	0	Good	LFT	2018-09-17	SO-2017.1	0
SO_C_20180718_O_1189.JPG	2018-07-18 14:02:37	58.49933889	-136.03863056	204	Optimal	0	0	0	0	Good	LFT	2018-09-17	SO-2017.1	0
SO_C_20180718_O_1190.JPG	2018-07-18 14:02:38	58.49933333	-136.03946111	204	Optimal	0	0	0	0	Good	LFT	2018-09-17	SO-2017.1	0
SO_C_20180718_O_1191.JPG	2018-07-18 14:02:39	58.49932778	-136.04028611	204	Optimal	0	0	0	0	Good	LFT	2018-09-17	SO-2017.1	0
SO_C_20180718_O_1192.JPG	2018-07-18 14:02:40	58.49932500	-136.04111667	204	Optimal	0	0	1	0	Good	LFT	2018-09-17	SO-2017.1	0
SO_C_20180718_O_1193.JPG	2018-07-18 14:02:41	58.49932222	-136.04194444	203	Optimal	0	0	0	0	Good	LFT	2018-09-17	SO-2017.1	0
SO_C_20180718_O_1194.JPG	2018-07-18 14:02:42	58.49932222	-136.04277500	203	Optimal	0	0	0	0	Good	LFT	2018-09-17	SO-2017.1	0
SO_C_20180718_O_1195.JPG	2018-07-18 14:02:43	58.49931667	-136.04360278	203	Optimal	0	0	0	0	Good	LFT	2018-09-17	SO-2017.1	0
SO_C_20180718_O_1196.JPG	2018-07-18 14:02:44	58.49931389	-136.04443056	203	Optimal	0	0	0	0	Good	LFT	2018-09-17	SO-2017.1	0
SO_C_20180718_O_1197.JPG	2018-07-18 14:02:45	58.49930556	-136.04525833	203	Optimal	0	0	0	0	Good	LFT	2018-09-17	SO-2017.1	0
SO_C_20180718_O_1198.JPG	2018-07-18 14:02:46	58.49929722	-136.04608611	202	Optimal	0	0	0	0	Good	LFT	2018-09-17	SO-2017.1	0
SO_C_20180718_O_1199.JPG	2018-07-18 14:02:47	58.49929167	-136.04691111	202	Optimal	0	0	0	0	Good	LFT	2018-09-17	SO-2017.1	0
SO_C_20180718_O_1200.JPG	2018-07-18 14:02:48	58.49928056	-136.04773889	202	Optimal	0	0	0	0	Good	LFT	2018-09-17	SO-2017.1	0
SO_C_20180718_O_1201.JPG	2018-07-18 14:02:49	58.49926944	-136.04856667	202	Optimal	0	0	0	0	Good	LFT	2018-09-17	SO-2017.1	0
SO_C_20180718_O_1202.JPG	2018-07-18 14:02:50	58.49926111	-136.04939167	201	Optimal	0	0	0	0	Good	LFT	2018-09-17	SO-2017.1	0
SO_C_20180718_O_1203.JPG	2018-07-18 14:02:51	58.49925278	-136.05021667	201	Optimal	0	0	0	0	Good	LFT	2018-09-17	SO-2017.1	0
SO_C_20180718_O_1204.JPG	2018-07-18 14:02:52	58.49924722	-136.05103889	201	Optimal	0	0	0	0	Good	LFT	2018-09-17	SO-2017.1	0
SO_C_20180718_O_1205.JPG	2018-07-18 14:02:53	58.49924722	-136.05186389	201	Optimal	0	0	0	0	Good	LFT	2018-09-17	SO-2017.1	0
SO_C_20180718_O_1206.JPG	2018-07-18 14:02:54	58.49924444	-136.05268611	201	Optimal	0	0	1	0	Good	LFT	2018-09-17	SO-2017.1	0
SO_C_20180718_O_1207.JPG	2018-07-18 14:02:55	58.49924444	-136.05351111	201	Optimal	0	0	1	0	Good	LFT	2018-09-17	SO-2017.1	0
SO_C_20180718_O_1208.JPG	2018-07-18 14:02:56	58.49924167	-136.05433333	201	Optimal	0	0	0	0	Good	LFT	2018-09-17	SO-2017.1	0
SO_C_20180718_O_1209.JPG	2018-07-18 14:02:57	58.49923611	-136.05515833	201	Optimal	0	0	1	0	Good	LFT	2018-09-17	SO-2017.1	0
SO_C_20180718_O_1210.JPG	2018-07-18 14:02:58	58.49923333	-136.05598056	201	Optimal	0	0	0	0	Good	LFT	2018-09-17	SO-2017.1	0
SO_C_20180718_O_1211.JPG	2018-07-18 14:02:59	58.49923611	-136.05679722	201	Optimal	0	0	0	0	Good	LFT	2018-09-17	SO-2017.1	0
SO_C_20180718_O_1212.JPG	2018-07-18 14:03:00	58.49923611	-136.05761944	201	Optimal	0	0	0	0	Good	LFT	2018-09-17	SO-2017.1	0
SO_C_20180718_O_1213.JPG	2018-07-18 14:03:01	58.49923333	-136.05843889	201	Optimal	0	0	0	0	Good	LFT	2018-09-17	SO-2017.1	0
SO_C_20180718_O_1214.JPG	2018-07-18 14:03:02	58.49922778	-136.05925833	201	Optimal	0	0	0	0	Good	LFT	2018-09-17	SO-2017.1	0
SO_C_20180718_O_1215.JPG	2018-07-18 14:03:03	58.49921667	-136.06007778	201	Optimal	0	0	0	0	Good	LFT	2018-09-17	SO-2017.1	0
SO_C_20180718_O_1216.JPG	2018-07-18 14:03:04	58.49920833	-136.06089444	201	Optimal	0	0	0	0	Good	LFT	2018-09-17	SO-2017.1	0
SO_C_20180718_O_1217.JPG	2018-07-18 14:03:05	58.49920000	-136.06170833	201	Optimal	0	0	0	0	Good	LFT	2018-09-17	SO-2017.1	0
SO_C_20180718_O_1218.JPG	2018-07-18 14:03:06	58.49919167	-136.06252222	202	Optimal	0	0	0	0	Good	LFT	2018-09-17	SO-2017.1	0
SO_C_20180718_O_1219.JPG	2018-07-18 14:03:07	58.49918056	-136.06333333	202	Optimal	0	0	1	0	Good	LFT	2018-09-17	SO-2017.1	0
SO_C_20180718_O_1220.JPG	2018-07-18 14:03:08	58.49917222	-136.06414444	202	Optimal	0	0	0	0	Good	LFT	2018-09-17	SO-2017.1	0
SO_C_20180718_O_1221.JPG	2018-07-18 14:03:09	58.49916389	-136.06495556	203	Optimal	0	0	0	0	Good	LFT	2018-09-17	SO-2017.1	0
SO_C_20180718_O_1222.JPG	2018-07-18 14:03:10	58.49915833	-136.06576944	203	Optimal	0	0	0	0	Good	LFT	2018-09-17	SO-2017.1	0
SO_C_20180718_O_1223.JPG	2018-07-18 14:03:11	58.49915556	-136.06658333	204	Optimal	0	0	0	0	Good	LFT	2018-09-17	SO-2017.1	0
SO_C_20180718_O_1224.JPG	2018-07-18 14:03:12	58.49915556	-136.06740278	205	Optimal	0	0	0	0	Good	LFT	2018-09-17	SO-2017.1	0
SO_C_20180718_O_1225.JPG	2018-07-18 14:03:13	58.49915278	-136.06822222	205	Optimal	0	0	0	0	Good	LFT	2018-09-17	SO-2017.1	0
SO_C_20180718_O_1226.JPG	2018-07-18 14:03:14	58.49915278	-136.06904444	206	Optimal	0	0	1	0	Good	LFT	2018-09-17	SO-2017.1	0
SO_C_20180718_O_1227.JPG	2018-07-18 14:03:15	58.49915278	-136.06986667	206	Optimal	0	0	0	0	Good	LFT	2018-09-17	SO-2017.1	0
SO_C_20180718_O_1228.JPG	2018-07-18 14:03:16	58.49915278	-136.07068889	206	Optimal	0	0	0	0	Good	LFT	2018-09-17	SO-2017.1	0
SO_C_20180718_O_1229.JPG	2018-07-18 14:03:17	58.49915278	-136.07151389	206	Optimal	0	0	0	0	Good	LFT	2018-09-17	SO-2017.1	0
SO_C_20180718_O_1230.JPG	2018-07-18 14:03:18	58.49915000	-136.07233611	206	Optimal	0	0	0	0	Good	LFT	2018-09-17	SO-2017.1	0
SO_C_20180718_O_1231.JPG	2018-07-18 14:03:19	58.49914444	-136.07315556	206	Optimal	0	0	0	0	Good	LFT	2018-09-17	SO-2017.1	0
SO_C_20180718_O_1232.JPG	2018-07-18 14:03:20	58.49914167	-136.07397778	206	Optimal	0	0	0	0	Good	LFT	2018-09-17	SO-2017.1	0
SO_C_20180718_O_1233.JPG	2018-07-18 14:03:21	58.49913611	-136.07479444	206	Optimal	0	0	0	0	Good	LFT	2018-09-17	SO-2017.1	0
SO_C_20180718_O_1234.JPG	2018-07-18 14:03:22	58.49913056	-136.07560833	206	Optimal	0	0	0	0	Good	LFT	2018-09-17	SO-2017.1	0
SO_C_20180718_O_1235.JPG	2018-07-18 14:03:23	58.49912778	-136.07642222	206	Optimal	0	0	0	0	Good	LFT	2018-09-17	SO-2017.1	0
SO_C_20180718_O_1236.JPG	2018-07-18 14:03:24	58.49912778	-136.07723611	207	Optimal	0	0	0	0	Good	LFT	2018-09-17	SO-2017.1	0
SO_C_20180718_O_1237.JPG	2018-07-18 14:03:25	58.49912778	-136.07805278	207	Optimal	0	0	0	0	Good	LFT	2018-09-17	SO-2017.1	0
SO_C_20180718_O_1238.JPG	2018-07-18 14:03:26	58.49913056	-136.07887222	208	Optimal	0	0	0	0	Good	LFT	2018-09-17	SO-2017.1	0
SO_C_20180718_O_1239.JPG	2018-07-18 14:03:27	58.49913056	-136.07969722	209	Optimal	0	0	0	0	Good	LFT	2018-09-17	SO-2017.1	0
SO_C_20180718_O_1240.JPG	2018-07-18 14:03:28	58.49913333	-136.08052500	210	Optimal	0	0	0	0	Good	LFT	2018-09-17	SO-2017.1	0
SO_C_20180718_O_1241.JPG	2018-07-18 14:03:29	58.49913333	-136.08136111	210	Optimal	0	0	0	0	Good	LFT	2018-09-17	SO-2017.1	0
SO_C_20180718_O_1242.JPG	2018-07-18 14:03:30	58.49913056	-136.08220278	210	Optimal	0	0	0	0	Good	LFT	2018-09-17	SO-2017.1	0
SO_C_20180718_O_1243.JPG	2018-07-18 14:03:31	58.49913056	-136.08305000	210	Optimal	0	0	0	0	Good	LFT	2018-09-17	SO-2017.1	0
SO_C_20180718_O_1244.JPG	2018-07-18 14:03:32	58.49913056	-136.08389722	210	Optimal	0	0	0	0	Good	LFT	2018-09-17	SO-2017.1	0
SO_C_20180718_O_1245.JPG	2018-07-18 14:03:33	58.49913056	-136.08474722	210	Optimal	0	0	0	0	Good	LFT	2018-09-17	SO-2017.1	0
SO_C_20180718_O_1246.JPG	2018-07-18 14:03:34	58.49913056	-136.08559444	209	Optimal	0	0	0	0	Good	LFT	2018-09-17	SO-2017.1	0
SO_C_20180718_O_1247.JPG	2018-07-18 14:03:35	58.49913611	-136.08644167	208	Optimal	0	0	0	0	Good	LFT	2018-09-17	SO-2017.1	0
SO_C_20180718_O_1248.JPG	2018-07-18 14:03:36	58.49913889	-136.08728611	207	Optimal	0	0	0	0	Good	LFT	2018-09-17	SO-2017.1	0
SO_C_20180718_O_1249.JPG	2018-07-18 14:03:37	58.49914444	-136.08812778	207	Optimal	0	0	0	0	Good	LFT	2018-09-17	SO-2017.1	0
SO_C_20180718_O_1250.JPG	2018-07-18 14:03:38	58.49914444	-136.08896667	206	Optimal	0	0	0	0	Good	LFT	2018-09-17	SO-2017.1	0
SO_C_20180718_O_1251.JPG	2018-07-18 14:03:39	58.49914167	-136.08980278	206	Optimal	0	0	0	0	Good	LFT	2018-09-17	SO-2017.1	0
SO_C_20180718_O_1252.JPG	2018-07-18 14:03:40	58.49913333	-136.09063611	206	Optimal	0	0	0	0	Good	LFT	2018-09-17	SO-2017.1	0
SO_C_20180718_O_1253.JPG	2018-07-18 14:03:41	58.49912500	-136.09146389	206	Optimal	0	0	0	0	Good	LFT	2018-09-17	SO-2017.1	0
SO_C_20180718_O_1254.JPG	2018-07-18 14:03:42	58.49911111	-136.09229167	207	Optimal	0	0	0	0	Good	LFT	2018-09-17	SO-2017.1	0
SO_C_20180718_O_1255.JPG	2018-07-18 14:03:43	58.49910000	-136.09312222	207	Optimal	0	0	0	0	Good	LFT	2018-09-17	SO-2017.1	0
SO_C_20180718_O_1256.JPG	2018-07-18 14:03:44	58.49908056	-136.09395278	208	Optimal	0	0	0	0	Good	LFT	2018-09-17	SO-2017.1	0
SO_C_20180718_O_1257.JPG	2018-07-18 14:03:45	58.49906111	-136.09478611	210	Optimal	0	0	0	0	Good	LFT	2018-09-17	SO-2017.1	0
SO_C_20180718_O_1258.JPG	2018-07-18 14:03:46	58.49903611	-136.09561944	211	Optimal	0	0	0	0	Good	LFT	2018-09-17	SO-2017.1	0
SO_C_20180718_O_1259.JPG	2018-07-18 14:03:47	58.49900833	-136.09645833	212	Optimal	0	0	0	0	Good	LFT	2018-09-17	SO-2017.1	0
SO_C_20180718_O_1260.JPG	2018-07-18 14:03:48	58.49898056	-136.09729722	213	Optimal	0	0	0	0	Good	LFT	2018-09-17	SO-2017.1	0
SO_C_20180718_O_1261.JPG	2018-07-18 14:03:49	58.49895000	-136.09813889	214	Optimal	0	0	1	0	Good	LFT	2018-09-17	SO-2017.1	0
SO_C_20180718_O_1262.JPG	2018-07-18 14:03:50	58.49891944	-136.09898056	214	Optimal	0	0	1	1	Good	LFT	2018-09-17	SO-2017.1	0
SO_C_20180718_O_1263.JPG	2018-07-18 14:03:51	58.49888611	-136.09981944	215	Optimal	0	0	1	1	Good	LFT	2018-09-17	SO-2017.1	0
SO_C_20180718_O_1264.JPG	2018-07-18 14:03:52	58.49885000	-136.10066111	215	Optimal	0	0	0	1	Good	LFT	2018-09-17	SO-2017.1	0
SO_C_20180718_O_1265.JPG	2018-07-18 14:03:53	58.49881111	-136.10150278	215	Optimal	0	0	0	1	Good	LFT	2018-09-17	SO-2017.1	0
SO_C_20180718_O_1266.JPG	2018-07-18 14:03:54	58.49876667	-136.10234444	214	Optimal	0	0	0	1	Good	LFT	2018-09-17	SO-2017.1	0
SO_C_20180718_O_1267.JPG	2018-07-18 14:03:55	58.49872500	-136.10318611	214	Optimal	0	0	0	1	Good	LFT	2018-09-17	SO-2017.1	0
SO_C_20180718_O_1268.JPG	2018-07-18 14:09:09	58.57284722	-136.20927778	212	Optimal	0	0	0	1	Good	LFT	2018-09-17	SO-2017.1	0
SO_C_20180718_O_1269.JPG	2018-07-18 14:09:10	58.57288056	-136.20850833	213	Optimal	0	0	0	1	Good	LFT	2018-09-17	SO-2017.1	0
SO_C_20180718_O_1270.JPG	2018-07-18 14:09:11	58.57292500	-136.20773611	213	Optimal	0	0	0	1	Good	LFT	2018-09-17	SO-2017.1	0
SO_C_20180718_O_1271.JPG	2018-07-18 14:09:12	58.57297500	-136.20695833	213	Optimal	0	0	0	1	Good	LFT	2018-09-17	SO-2017.1	0
SO_C_20180718_O_1272.JPG	2018-07-18 14:09:13	58.57303056	-136.20617778	212	Optimal	0	0	0	1	Good	LFT	2018-09-17	SO-2017.1	0
SO_C_20180718_O_1273.JPG	2018-07-18 14:09:14	58.57308056	-136.20538611	212	Optimal	0	0	0	1	Good	LFT	2018-09-17	SO-2017.1	0
SO_C_20180718_O_1274.JPG	2018-07-18 14:09:15	58.57312500	-136.20458889	211	Optimal	0	0	0	1	Good	LFT	2018-09-17	SO-2017.1	0
SO_C_20180718_O_1275.JPG	2018-07-18 14:09:16	58.57316111	-136.20378889	210	Optimal	0	0	0	1	Good	LFT	2018-09-17	SO-2017.1	0
SO_C_20180718_O_1276.JPG	2018-07-18 14:09:17	58.57318611	-136.20298333	209	Optimal	0	0	0	1	Good	LFT	2018-09-17	SO-2017.1	0
SO_C_20180718_O_1277.JPG	2018-07-18 14:09:18	58.57319722	-136.20217500	208	Optimal	0	0	1	1	Good	LFT	2018-09-17	SO-2017.1	0
SO_C_20180718_O_1278.JPG	2018-07-18 14:09:19	58.57320556	-136.20136667	207	Optimal	0	0	1	1	Good	LFT	2018-09-17	SO-2017.1	0
SO_C_20180718_O_1279.JPG	2018-07-18 14:09:20	58.57321667	-136.20055556	206	Optimal	0	0	1	1	Good	LFT	2018-09-17	SO-2017.1	0
SO_C_20180718_O_1280.JPG	2018-07-18 14:09:21	58.57323056	-136.19974444	206	Optimal	0	0	1	0	Good	LFT	2018-09-17	SO-2017.1	0
SO_C_20180718_O_1281.JPG	2018-07-18 14:09:22	58.57324444	-136.19893611	205	Optimal	0	0	1	0	Good	LFT	2018-09-17	SO-2017.1	0
SO_C_20180718_O_1282.JPG	2018-07-18 14:09:23	58.57326111	-136.19812778	205	Optimal	0	0	1	1	Good	LFT	2018-09-17	SO-2017.1	0
SO_C_20180718_O_1283.JPG	2018-07-18 14:09:24	58.57328056	-136.19732222	204	Optimal	0	0	1	1	Good	LFT	2018-09-17	SO-2017.1	0
SO_C_20180718_O_1284.JPG	2018-07-18 14:09:25	58.57330000	-136.19651667	204	Optimal	0	0	1	1	Good	LFT	2018-09-17	SO-2017.1	0
SO_C_20180718_O_1285.JPG	2018-07-18 14:09:26	58.57332222	-136.19571389	204	Optimal	0	0	1	0	Good	LFT	2018-09-17	SO-2017.1	0
SO_C_20180718_O_1286.JPG	2018-07-18 14:09:27	58.57334444	-136.19491389	204	Optimal	0	0	1	0	Good	LFT	2018-09-17	SO-2017.1	0
SO_C_20180718_O_1287.JPG	2018-07-18 14:09:28	58.57336944	-136.19411667	204	Optimal	0	0	1	0	Good	LFT	2018-09-17	SO-2017.1	0
SO_C_20180718_O_1288.JPG	2018-07-18 14:09:29	58.57339167	-136.19332222	205	Optimal	0	0	0	0	Good	LFT	2018-09-17	SO-2017.1	0
SO_C_20180718_O_1289.JPG	2018-07-18 14:09:30	58.57341111	-136.19253333	205	Optimal	0	0	0	0	Good	LFT	2018-09-17	SO-2017.1	0
SO_C_20180718_O_1290.JPG	2018-07-18 14:09:31	58.57342778	-136.19174722	206	Optimal	0	0	0	0	Good	LFT	2018-09-17	SO-2017.1	0
SO_C_20180718_O_1291.JPG	2018-07-18 14:09:32	58.57343611	-136.19095833	207	Optimal	0	0	0	0	Good	LFT	2018-09-17	SO-2017.1	0
SO_C_20180718_O_1292.JPG	2018-07-18 14:09:33	58.57344167	-136.19016944	208	Optimal	0	0	0	0	Good	LFT	2018-09-17	SO-2017.1	0
SO_C_20180718_O_1293.JPG	2018-07-18 14:09:34	58.57344722	-136.18937778	209	Optimal	0	0	0	0	Good	LFT	2018-09-17	SO-2017.1	0
SO_C_20180718_O_1294.JPG	2018-07-18 14:09:35	58.57345000	-136.18858333	210	Optimal	0	0	0	0	Good	LFT	2018-09-17	SO-2017.1	0
SO_C_20180718_O_1295.JPG	2018-07-18 14:09:36	58.57345000	-136.18778889	210	Optimal	0	0	0	0	Good	LFT	2018-09-17	SO-2017.1	0
SO_C_20180718_O_1296.JPG	2018-07-18 14:09:37	58.57345000	-136.18699444	211	Optimal	0	0	0	0	Good	LFT	2018-09-17	SO-2017.1	0
SO_C_20180718_O_1297.JPG	2018-07-18 14:09:38	58.57344722	-136.18620000	212	Optimal	0	0	0	0	Good	LFT	2018-09-17	SO-2017.1	0
SO_C_20180718_O_1298.JPG	2018-07-18 14:09:39	58.57344167	-136.18540278	212	Optimal	0	0	0	0	Good	LFT	2018-09-17	SO-2017.1	0
SO_C_20180718_O_1299.JPG	2018-07-18 14:09:40	58.57343889	-136.18460556	212	Optimal	0	0	0	0	Good	LFT	2018-09-17	SO-2017.1	0
SO_C_20180718_O_1300.JPG	2018-07-18 14:09:41	58.57343333	-136.18380833	212	Optimal	0	0	0	0	Good	LFT	2018-09-17	SO-2017.1	0
SO_C_20180718_O_1301.JPG	2018-07-18 14:09:42	58.57343333	-136.18301389	212	Optimal	0	0	0	0	Good	LFT	2018-09-17	SO-2017.1	0
SO_C_20180718_O_1302.JPG	2018-07-18 14:09:43	58.57343333	-136.18221944	212	Optimal	0	0	1	0	Good	LFT	2018-09-17	SO-2017.1	0
SO_C_20180718_O_1303.JPG	2018-07-18 14:09:44	58.57343611	-136.18142778	213	Optimal	0	0	1	1	Good	LFT	2018-09-17	SO-2017.1	0
SO_C_20180718_O_1304.JPG	2018-07-18 14:09:45	58.57343611	-136.18063333	213	Optimal	0	0	1	1	Good	LFT	2018-09-17	SO-2017.1	0
SO_C_20180718_O_1305.JPG	2018-07-18 14:09:46	58.57343611	-136.17983889	213	Optimal	0	0	0	1	Good	LFT	2018-09-17	SO-2017.1	0
SO_C_20180718_O_1306.JPG	2018-07-18 14:09:47	58.57343889	-136.17904444	213	Optimal	0	0	1	1	Good	LFT	2018-09-17	SO-2017.1	0
SO_C_20180718_O_1307.JPG	2018-07-18 14:09:48	58.57343889	-136.17825000	214	Optimal	0	0	1	1	Good	LFT	2018-09-17	SO-2017.1	0
SO_C_20180718_O_1308.JPG	2018-07-18 14:09:49	58.57343611	-136.17745556	215	Optimal	0	0	1	0	Good	LFT	2018-09-17	SO-2017.1	0
SO_C_20180718_O_1309.JPG	2018-07-18 14:09:50	58.57343056	-136.17666111	215	Optimal	0	0	1	0	Good	LFT	2018-09-17	SO-2017.1	0
SO_C_20180718_O_1310.JPG	2018-07-18 14:09:51	58.57342222	-136.17586389	216	Optimal	0	0	0	0	Good	LFT	2018-09-17	SO-2017.1	0
SO_C_20180718_O_1311.JPG	2018-07-18 14:09:52	58.57341389	-136.17506944	217	Optimal	0	0	0	0	Good	LFT	2018-09-17	SO-2017.1	0
SO_C_20180718_O_1312.JPG	2018-07-18 14:09:53	58.57340833	-136.17427222	217	Optimal	0	0	0	0	Good	LFT	2018-09-17	SO-2017.1	0
SO_C_20180718_O_1313.JPG	2018-07-18 14:09:54	58.57340556	-136.17347778	218	Optimal	0	0	0	0	Good	LFT	2018-09-17	SO-2017.1	0
SO_C_20180718_O_1314.JPG	2018-07-18 14:09:55	58.57340556	-136.17267500	218	Optimal	0	0	0	0	Good	LFT	2018-09-17	SO-2017.1	0
SO_C_20180718_O_1315.JPG	2018-07-18 14:09:56	58.57340833	-136.17187778	219	Optimal	0	0	0	0	Good	LFT	2018-09-17	SO-2017.1	0
SO_C_20180718_O_1316.JPG	2018-07-18 14:09:57	58.57340833	-136.17106667	220	Optimal	0	0	0	0	Good	LFT	2018-09-17	SO-2017.1	0
SO_C_20180718_O_1317.JPG	2018-07-18 14:09:58	58.57341389	-136.17026389	220	Optimal	0	0	0	0	Good	LFT	2018-09-17	SO-2017.1	0
SO_C_20180718_O_1318.JPG	2018-07-18 14:09:59	58.57341944	-136.16946111	220	Optimal	0	0	0	0	Good	LFT	2018-09-17	SO-2017.1	0
SO_C_20180718_O_1319.JPG	2018-07-18 14:10:00	58.57342778	-136.16865556	221	Optimal	0	0	0	0	Good	LFT	2018-09-17	SO-2017.1	0
SO_C_20180718_O_1320.JPG	2018-07-18 14:10:01	58.57343611	-136.16784722	221	Optimal	0	0	0	0	Good	LFT	2018-09-17	SO-2017.1	0
SO_C_20180718_O_1321.JPG	2018-07-18 14:10:02	58.57344444	-136.16703611	221	Optimal	0	0	0	0	Good	LFT	2018-09-17	SO-2017.1	0
SO_C_20180718_O_1322.JPG	2018-07-18 14:10:03	58.57345556	-136.16622500	222	Optimal	0	0	0	0	Good	LFT	2018-09-17	SO-2017.1	0
SO_C_20180718_O_1323.JPG	2018-07-18 14:10:04	58.57346667	-136.16541111	222	Optimal	0	0	0	0	Good	LFT	2018-09-17	SO-2017.1	0
SO_C_20180718_O_1324.JPG	2018-07-18 14:10:05	58.57347778	-136.16459167	222	Optimal	0	0	0	0	Good	LFT	2018-09-17	SO-2017.1	0
SO_C_20180718_O_1325.JPG	2018-07-18 14:10:06	58.57348889	-136.16376667	223	Optimal	0	0	0	0	Good	LFT	2018-09-17	SO-2017.1	0
SO_C_20180718_O_1326.JPG	2018-07-18 14:10:07	58.57349722	-136.16293611	223	Optimal	0	0	0		Good	LFT	2018-09-17	SO-2017.1	0
SO_C_20180718_O_1327.JPG	2018-07-18 14:10:08	58.57350278	-136.16209722	223	Optimal	0	0	0	0	Good	LFT	2018-09-17	SO-2017.1	0
SO_C_20180718_O_1328.JPG	2018-07-18 14:10:09	58.57350833	-136.16125278	223	Optimal	0	0	0	0	Good	LFT	2018-09-17	SO-2017.1	0
SO_C_20180718_O_1329.JPG	2018-07-18 14:10:10	58.57350833	-136.16039722	223	Optimal	0	0	0	0	Good	LFT	2018-09-17	SO-2017.1	0
SO_C_20180718_O_1330.JPG	2018-07-18 14:10:11	58.57351111	-136.15953889	223	Optimal	0	0	0	0	Good	LFT	2018-09-17	SO-2017.1	0
SO_C_20180718_O_1331.JPG	2018-07-18 14:10:12	58.57352222	-136.15867778	223	Optimal	0	0	0	0	Good	LFT	2018-09-17	SO-2017.1	0
SO_C_20180718_O_1332.JPG	2018-07-18 14:10:13	58.57352778	-136.15781389	222	Optimal	0	0	0	0	Good	LFT	2018-09-17	SO-2017.1	0
SO_C_20180718_O_1333.JPG	2018-07-18 14:10:14	58.57353333	-136.15694722	222	Optimal	0	0	0	0	Good	LFT	2018-09-17	SO-2017.1	0
SO_C_20180718_O_1334.JPG	2018-07-18 14:10:15	58.57354167	-136.15608056	221	Optimal	0	0	0	0	Good	LFT	2018-09-17	SO-2017.1	0
SO_C_20180718_O_1335.JPG	2018-07-18 14:10:16	58.57354722	-136.15521389	221	Optimal	0	0	0	0	Good	LFT	2018-09-17	SO-2017.1	0
SO_C_20180718_O_1336.JPG	2018-07-18 14:10:17	58.57355278	-136.15435000	220	Optimal	0	0	0	0	Good	LFT	2018-09-17	SO-2017.1	0
SO_C_20180718_O_1337.JPG	2018-07-18 14:10:18	58.57355833	-136.15348333	219	Optimal	0	0	0	0	Good	LFT	2018-09-17	SO-2017.1	0
SO_C_20180718_O_1338.JPG	2018-07-18 14:10:19	58.57356667	-136.15261667	219	Optimal	0	0	0	0	Good	LFT	2018-09-17	SO-2017.1	0
SO_C_20180718_O_1339.JPG	2018-07-18 14:10:20	58.57357500	-136.15175000	218	Optimal	0	0	0	0	Good	LFT	2018-09-17	SO-2017.1	0
SO_C_20180718_O_1340.JPG	2018-07-18 14:10:21	58.57358611	-136.15088056	218	Optimal	0	0	0	0	Good	LFT	2018-09-17	SO-2017.1	0
SO_C_20180718_O_1341.JPG	2018-07-18 14:10:22	58.57360000	-136.15000833	218	Optimal	0	0	0	0	Good	LFT	2018-09-17	SO-2017.1	0
SO_C_20180718_O_1342.JPG	2018-07-18 14:10:23	58.57361389	-136.14913333	217	Optimal	0	0	0	0	Good	LFT	2018-09-17	SO-2017.1	0
SO_C_20180718_O_1343.JPG	2018-07-18 14:10:24	58.57362500	-136.14825556	217	Optimal	0	0	0	0	Good	LFT	2018-09-17	SO-2017.1	0
SO_C_20180718_O_1344.JPG	2018-07-18 14:10:25	58.57363333	-136.14737500	217	Optimal	0	0	0	0	Good	LFT	2018-09-17	SO-2017.1	0
SO_C_20180718_O_1345.JPG	2018-07-18 14:10:26	58.57364167	-136.14649722	217	Optimal	0	0	0	0	Good	LFT	2018-09-17	SO-2017.1	0
SO_C_20180718_O_1346.JPG	2018-07-18 14:10:27	58.57365278	-136.14561667	217	Optimal	0	0	0	0	Good	LFT	2018-09-17	SO-2017.1	0
SO_C_20180718_O_1347.JPG	2018-07-18 14:10:28	58.57366111	-136.14473889	217	Optimal	0	0	0	0	Good	LFT	2018-09-17	SO-2017.1	0
SO_C_20180718_O_1348.JPG	2018-07-18 14:10:29	58.57367500	-136.14386111	217	Optimal	0	0	0	0	Good	LFT	2018-09-17	SO-2017.1	0
SO_C_20180718_O_1349.JPG	2018-07-18 14:10:30	58.57368611	-136.14298056	217	Optimal	0	0	0	0	Good	LFT	2018-09-17	SO-2017.1	0
SO_C_20180718_O_1350.JPG	2018-07-18 14:10:31	58.57370278	-136.14210000	216	Optimal	0	0	0	0	Good	LFT	2018-09-17	SO-2017.1	0
SO_C_20180718_O_1351.JPG	2018-07-18 14:10:32	58.57371667	-136.14121944	216	Optimal	0	0	0	0	Good	LFT	2018-09-17	SO-2017.1	0
SO_C_20180718_O_1352.JPG	2018-07-18 14:10:33	58.57373056	-136.14034167	217	Optimal	0	0	0	0	Good	LFT	2018-09-17	SO-2017.1	0
SO_C_20180718_O_1353.JPG	2018-07-18 14:10:34	58.57374167	-136.13945833	217	Optimal	0	0	0	0	Good	LFT	2018-09-17	SO-2017.1	0
SO_C_20180718_O_1354.JPG	2018-07-18 14:10:35	58.57375278	-136.13857778	217	Optimal	0	0	0	0	Good	LFT	2018-09-17	SO-2017.1	0
SO_C_20180718_O_1355.JPG	2018-07-18 14:10:36	58.57376389	-136.13769722	217	Optimal	0	0	0	0	Good	LFT	2018-09-17	SO-2017.1	0
SO_C_20180718_O_1356.JPG	2018-07-18 14:10:37	58.57377778	-136.13681667	217	Optimal	0	0	0	0	Good	LFT	2018-09-17	SO-2017.1	0
SO_C_20180718_O_1357.JPG	2018-07-18 14:10:38	58.57379167	-136.13593611	217	Optimal	0	0	0	0	Good	LFT	2018-09-17	SO-2017.1	0
SO_C_20180718_O_1358.JPG	2018-07-18 14:10:39	58.57380833	-136.13505556	217	Optimal	0	0	0	0	Good	LFT	2018-09-17	SO-2017.1	0
SO_C_20180718_O_1359.JPG	2018-07-18 14:10:40	58.57382778	-136.13417500	218	Optimal	0	0	0	0	Good	LFT	2018-09-17	SO-2017.1	0
SO_C_20180718_O_1360.JPG	2018-07-18 14:10:41	58.57384722	-136.13330000	218	Optimal	0	0	0	0	Good	LFT	2018-09-17	SO-2017.1	0
SO_C_20180718_O_1361.JPG	2018-07-18 14:10:42	58.57386667	-136.13242222	218	Optimal	0	0	0	0	Good	LFT	2018-09-17	SO-2017.1	0
SO_C_20180718_O_1362.JPG	2018-07-18 14:10:43	58.57388611	-136.13154722	219	Optimal	0	0	0	0	Good	LFT	2018-09-17	SO-2017.1	0
SO_C_20180718_O_1363.JPG	2018-07-18 14:10:44	58.57390556	-136.13067222	219	Optimal	0	0	0	0	Good	LFT	2018-09-17	SO-2017.1	0
SO_C_20180718_O_1364.JPG	2018-07-18 14:10:45	58.57393056	-136.12979722	219	Optimal	0	0	0	0	Good	LFT	2018-09-17	SO-2017.1	0
SO_C_20180718_O_1365.JPG	2018-07-18 14:10:46	58.57395833	-136.12892500	220	Optimal	0	0	0	0	Good	LFT	2018-09-17	SO-2017.1	0
SO_C_20180718_O_1366.JPG	2018-07-18 14:10:47	58.57399167	-136.12805000	220	Optimal	0	0	0	0	Good	LFT	2018-09-17	SO-2017.1	0
SO_C_20180718_O_1367.JPG	2018-07-18 14:11:47	58.57401389	-136.08920833	290	Optimal	0	0	1	1	Good	LFT	2018-09-17	SO-2017.1	0
SO_C_20180718_O_1368.JPG	2018-07-18 14:11:48	58.57417222	-136.08843611	288	Optimal	0	0	1	0	Good	LFT	2018-09-17	SO-2017.1	0
SO_C_20180718_O_1369.JPG	2018-07-18 14:11:49	58.57430556	-136.08764444	286	Optimal	0	0	0	0	Good	LFT	2018-09-17	SO-2017.1	0
SO_C_20180718_O_1370.JPG	2018-07-18 14:11:50	58.57441389	-136.08683889	284	Optimal	0	0	0	0	Good	LFT	2018-09-17	SO-2017.1	0
SO_C_20180718_O_1371.JPG	2018-07-18 14:11:51	58.57449722	-136.08601389	283	Optimal	0	0	0	0	Good	LFT	2018-09-17	SO-2017.1	0
SO_C_20180718_O_1372.JPG	2018-07-18 14:11:52	58.57456944	-136.08518333	281	Optimal	0	0	0	0	Good	LFT	2018-09-17	SO-2017.1	0
SO_C_20180718_O_1373.JPG	2018-07-18 14:11:53	58.57463056	-136.08434444	280	Optimal	0	0	0	0	Good	LFT	2018-09-17	SO-2017.1	0
SO_C_20180718_O_1374.JPG	2018-07-18 14:11:54	58.57468611	-136.08350278	278	Optimal	0	0	0	0	Good	LFT	2018-09-17	SO-2017.1	0
SO_C_20180718_O_1375.JPG	2018-07-18 14:11:55	58.57473611	-136.08265833	276	Optimal	0	0	0	0	Good	LFT	2018-09-17	SO-2017.1	0
SO_C_20180718_O_1376.JPG	2018-07-18 14:11:56	58.57477778	-136.08181111	275	Optimal	0	0	0	0	Good	LFT	2018-09-17	SO-2017.1	0
SO_C_20180718_O_1377.JPG	2018-07-18 14:11:57	58.57480556	-136.08095833	273	Optimal	0	0	0	0	Good	LFT	2018-09-17	SO-2017.1	0
SO_C_20180718_O_1378.JPG	2018-07-18 14:11:58	58.57482222	-136.08010278	271	Optimal	0	0	0	0	Good	LFT	2018-09-17	SO-2017.1	0
SO_C_20180718_O_1379.JPG	2018-07-18 14:11:59	58.57482778	-136.07924167	269	Optimal	0	0	0	0	Good	LFT	2018-09-17	SO-2017.1	0
SO_C_20180718_O_1380.JPG	2018-07-18 14:12:00	58.57482500	-136.07838056	267	Optimal	0	0	0	0	Good	LFT	2018-09-17	SO-2017.1	0
SO_C_20180718_O_1381.JPG	2018-07-18 14:12:01	58.57481944	-136.07751667	264	Optimal	0	0	0	0	Good	LFT	2018-09-17	SO-2017.1	0
SO_C_20180718_O_1382.JPG	2018-07-18 14:12:02	58.57480556	-136.07665000	262	Optimal	0	0	0	0	Good	LFT	2018-09-17	SO-2017.1	0
SO_C_20180718_O_1383.JPG	2018-07-18 14:12:03	58.57479167	-136.07578056	259	Optimal	0	0	0	0	Good	LFT	2018-09-17	SO-2017.1	0
SO_C_20180718_O_1384.JPG	2018-07-18 14:12:04	58.57476944	-136.07490833	256	Optimal	0	0	0	0	Good	LFT	2018-09-17	SO-2017.1	0
SO_C_20180718_O_1385.JPG	2018-07-18 14:12:05	58.57474167	-136.07403611	253	Optimal	0	0	0	0	Good	LFT	2018-09-17	SO-2017.1	0
SO_C_20180718_O_1386.JPG	2018-07-18 14:12:06	58.57471111	-136.07316667	249	Optimal	0	0	0	0	Good	LFT	2018-09-17	SO-2017.1	0
SO_C_20180718_O_1387.JPG	2018-07-18 14:12:07	58.57468056	-136.07229722	246	Optimal	0	0	0	0	Good	LFT	2018-09-17	SO-2017.1	0
SO_C_20180718_O_1388.JPG	2018-07-18 14:12:08	58.57465000	-136.07143056	243	Optimal	0	0	0	0	Good	LFT	2018-09-17	SO-2017.1	0
SO_C_20180718_O_1389.JPG	2018-07-18 14:12:09	58.57461944	-136.07056667	240	Optimal	0	0	0	0	Good	LFT	2018-09-17	SO-2017.1	0
SO_C_20180718_O_1390.JPG	2018-07-18 14:12:10	58.57459167	-136.06970833	237	Optimal	0	0	0	0	Good	LFT	2018-09-17	SO-2017.1	0
SO_C_20180718_O_1391.JPG	2018-07-18 14:12:11	58.57456389	-136.06885000	234	Optimal	0	0	0	0	Good	LFT	2018-09-17	SO-2017.1	0
SO_C_20180718_O_1392.JPG	2018-07-18 14:12:12	58.57453056	-136.06799444	231	Optimal	0	0	0	0	Good	LFT	2018-09-17	SO-2017.1	0
SO_C_20180718_O_1393.JPG	2018-07-18 14:12:13	58.57450278	-136.06714444	228	Optimal	0	0	0	0	Good	LFT	2018-09-17	SO-2017.1	0
SO_C_20180718_O_1394.JPG	2018-07-18 14:12:14	58.57447778	-136.06630000	225	Optimal	0	0	0	0	Good	LFT	2018-09-17	SO-2017.1	0
SO_C_20180718_O_1395.JPG	2018-07-18 14:12:15	58.57445278	-136.06546111	222	Optimal	0	0	0	0	Good	LFT	2018-09-17	SO-2017.1	0
SO_C_20180718_O_1396.JPG	2018-07-18 14:12:16	58.57443333	-136.06463333	220	Optimal	0	0	0	0	Good	LFT	2018-09-17	SO-2017.1	0
SO_C_20180718_O_1397.JPG	2018-07-18 14:12:17	58.57441944	-136.06381111	217	Optimal	0	0	0	0	Good	LFT	2018-09-17	SO-2017.1	0
SO_C_20180718_O_1398.JPG	2018-07-18 14:12:18	58.57440556	-136.06298333	215	Optimal	0	0	0	0	Good	LFT	2018-09-17	SO-2017.1	0
SO_C_20180718_O_1399.JPG	2018-07-18 14:12:19	58.57440000	-136.06216667	213	Optimal	0	0	0	0	Good	LFT	2018-09-17	SO-2017.1	0
SO_C_20180718_O_1400.JPG	2018-07-18 14:12:20	58.57439444	-136.06134167	212	Optimal	0	0	0	0	Good	LFT	2018-09-17	SO-2017.1	0
SO_C_20180718_O_1401.JPG	2018-07-18 14:12:21	58.57439444	-136.06052500	211	Optimal	0	0	0	0	Good	LFT	2018-09-17	SO-2017.1	0
SO_C_20180718_O_1402.JPG	2018-07-18 14:12:22	58.57440556	-136.05971667	210	Optimal	0	0	0	0	Good	LFT	2018-09-17	SO-2017.1	0
SO_C_20180718_O_1403.JPG	2018-07-18 14:12:23	58.57441944	-136.05891111	209	Optimal	0	0	0	0	Good	LFT	2018-09-17	SO-2017.1	0
SO_C_20180718_O_1404.JPG	2018-07-18 14:12:24	58.57443333	-136.05810278	209	Optimal	0	0	0	0	Good	LFT	2018-09-17	SO-2017.1	0
SO_C_20180718_O_1405.JPG	2018-07-18 14:12:25	58.57445000	-136.05730000	208	Optimal	0	0	0	0	Good	LFT	2018-09-17	SO-2017.1	0
SO_C_20180718_O_1406.JPG	2018-07-18 14:12:26	58.57446389	-136.05649722	207	Optimal	0	0	0	0	Good	LFT	2018-09-17	SO-2017.1	0
SO_C_20180718_O_1407.JPG	2018-07-18 14:12:27	58.57448056	-136.05569444	207	Optimal	0	0	0	0	Good	LFT	2018-09-17	SO-2017.1	0
SO_C_20180718_O_1408.JPG	2018-07-18 14:12:28	58.57449722	-136.05489444	206	Optimal	0	0	0	0	Good	LFT	2018-09-17	SO-2017.1	0
SO_C_20180718_O_1409.JPG	2018-07-18 14:12:29	58.57450833	-136.05408611	206	Optimal	0	0	0	0	Good	LFT	2018-09-17	SO-2017.1	0
SO_C_20180718_O_1410.JPG	2018-07-18 14:12:30	58.57451667	-136.05327500	205	Optimal	0	0	0	0	Good	LFT	2018-09-17	SO-2017.1	0
SO_C_20180718_O_1411.JPG	2018-07-18 14:12:31	58.57452778	-136.05246944	205	Optimal	0	0	0	0	Good	LFT	2018-09-17	SO-2017.1	0
SO_C_20180718_O_1412.JPG	2018-07-18 14:12:32	58.57453611	-136.05166111	204	Optimal	0	0	0	0	Good	LFT	2018-09-17	SO-2017.1	0
SO_C_20180718_O_1413.JPG	2018-07-18 14:12:33	58.57454444	-136.05085833	204	Optimal	0	0	0	0	Good	LFT	2018-09-17	SO-2017.1	0
SO_C_20180718_O_1414.JPG	2018-07-18 14:12:34	58.57455278	-136.05005833	203	Optimal	0	0	0	0	Good	LFT	2018-09-17	SO-2017.1	0
SO_C_20180718_O_1415.JPG	2018-07-18 14:12:35	58.57455556	-136.04925556	203	Optimal	0	0	0	0	Good	LFT	2018-09-17	SO-2017.1	0
SO_C_20180718_O_1416.JPG	2018-07-18 14:12:36	58.57456111	-136.04845833	203	Optimal	0	0	0	0	Good	LFT	2018-09-17	SO-2017.1	0
SO_C_20180718_O_1417.JPG	2018-07-18 14:12:37	58.57456944	-136.04766389	202	Optimal	0	0	0	0	Good	LFT	2018-09-17	SO-2017.1	0
SO_C_20180718_O_1418.JPG	2018-07-18 14:12:38	58.57457778	-136.04687222	202	Optimal	0	0	0	0	Good	LFT	2018-09-17	SO-2017.1	0
SO_C_20180718_O_1419.JPG	2018-07-18 14:12:39	58.57458611	-136.04608056	202	Optimal	0	0	0	0	Good	LFT	2018-09-17	SO-2017.1	0
SO_C_20180718_O_1420.JPG	2018-07-18 14:12:40	58.57459167	-136.04529167	202	Optimal	0	0	0	0	Good	LFT	2018-09-17	SO-2017.1	0
SO_C_20180718_O_1421.JPG	2018-07-18 14:12:41	58.57459722	-136.04450556	202	Optimal	0	0	0	0	Good	LFT	2018-09-17	SO-2017.1	0
SO_C_20180718_O_1422.JPG	2018-07-18 14:12:42	58.57460000	-136.04372222	203	Optimal	0	0	0	0	Good	LFT	2018-09-17	SO-2017.1	0
SO_C_20180718_O_1423.JPG	2018-07-18 14:12:43	58.57460556	-136.04293889	203	Optimal	0	0	0	0	Good	LFT	2018-09-17	SO-2017.1	0
SO_C_20180718_O_1424.JPG	2018-07-18 14:12:44	58.57460833	-136.04216111	203	Optimal	0	0	0	0	Good	LFT	2018-09-17	SO-2017.1	0
SO_C_20180718_O_1425.JPG	2018-07-18 14:12:45	58.57461389	-136.04138056	203	Optimal	0	0	0	0	Good	LFT	2018-09-17	SO-2017.1	0
SO_C_20180718_O_1426.JPG	2018-07-18 14:12:46	58.57461944	-136.04059722	204	Optimal	0	0	0	0	Good	LFT	2018-09-17	SO-2017.1	0
SO_C_20180718_O_1427.JPG	2018-07-18 14:12:47	58.57462222	-136.03981667	204	Optimal	0	0	0	0	Good	LFT	2018-09-17	SO-2017.1	0
SO_C_20180718_O_1428.JPG	2018-07-18 14:12:48	58.57462222	-136.03903611	205	Optimal	0	0	0	0	Good	LFT	2018-09-17	SO-2017.1	0
SO_C_20180718_O_1429.JPG	2018-07-18 14:12:49	58.57462222	-136.03825278	206	Optimal	0	0	0	0	Good	LFT	2018-09-17	SO-2017.1	0
SO_C_20180718_O_1430.JPG	2018-07-18 14:12:50	58.57462500	-136.03746667	206	Optimal	0	0	0	0	Good	LFT	2018-09-17	SO-2017.1	0
SO_C_20180718_O_1431.JPG	2018-07-18 14:12:51	58.57462500	-136.03667222	207	Optimal	0	0	0	0	Good	LFT	2018-09-17	SO-2017.1	0
SO_C_20180718_O_1432.JPG	2018-07-18 14:12:52	58.57462500	-136.03587222	208	Optimal	0	0	0	0	Good	LFT	2018-09-17	SO-2017.1	0
SO_C_20180718_O_1433.JPG	2018-07-18 14:12:53	58.57462222	-136.03506389	209	Optimal	0	0	0	0	Good	LFT	2018-09-17	SO-2017.1	0
SO_C_20180718_O_1434.JPG	2018-07-18 14:12:54	58.57461944	-136.03425000	210	Optimal	0	0	0	0	Good	LFT	2018-09-17	SO-2017.1	0
SO_C_20180718_O_1435.JPG	2018-07-18 14:12:55	58.57461944	-136.03342500	210	Optimal	1	0	0	0	Good	LFT	2018-09-17	SO-2017.1	0
SO_C_20180718_O_1436.JPG	2018-07-18 14:12:56	58.57461667	-136.03259722	211	Optimal	0	0	0	0	Good	LFT	2018-09-17	SO-2017.1	0
SO_C_20180718_O_1437.JPG	2018-07-18 14:12:57	58.57461389	-136.03176944	211	Optimal	0	0	0	0	Good	LFT	2018-09-17	SO-2017.1	0
SO_C_20180718_O_1438.JPG	2018-07-18 14:12:58	58.57461111	-136.03093889	210	Optimal	0	0	0	0	Good	LFT	2018-09-17	SO-2017.1	0
SO_C_20180718_O_1439.JPG	2018-07-18 14:12:59	58.57460556	-136.03010278	209	Optimal	0	0	0	0	Good	LFT	2018-09-17	SO-2017.1	0
SO_C_20180718_O_1440.JPG	2018-07-18 14:13:00	58.57459722	-136.02926111	209	Optimal	0	0	0	0	Good	LFT	2018-09-17	SO-2017.1	0
SO_C_20180718_O_1441.JPG	2018-07-18 14:13:01	58.57459444	-136.02842500	208	Optimal	0	0	0	0	Good	LFT	2018-09-17	SO-2017.1	0
SO_C_20180718_O_1442.JPG	2018-07-18 14:13:02	58.57459444	-136.02759722	207	Optimal	0	0	0	0	Good	LFT	2018-09-17	SO-2017.1	0
SO_C_20180718_O_1443.JPG	2018-07-18 14:13:03	58.57459444	-136.02676944	207	Optimal	0	0	0	0	Good	LFT	2018-09-17	SO-2017.1	0
SO_C_20180718_O_1444.JPG	2018-07-18 14:13:04	58.57459722	-136.02594444	207	Optimal	0	0	0	0	Good	LFT	2018-09-17	SO-2017.1	0
SO_C_20180718_O_1445.JPG	2018-07-18 14:13:05	58.57460000	-136.02512222	207	Optimal	0	0	0	0	Good	LFT	2018-09-17	SO-2017.1	0
SO_C_20180718_O_1446.JPG	2018-07-18 14:13:06	58.57460556	-136.02430278	207	Optimal	0	0	0	0	Good	LFT	2018-09-17	SO-2017.1	0
SO_C_20180718_O_1447.JPG	2018-07-18 14:13:07	58.57461111	-136.02348333	207	Optimal	0	0	0	0	Good	LFT	2018-09-17	SO-2017.1	0
SO_C_20180718_O_1448.JPG	2018-07-18 14:13:08	58.57461944	-136.02266667	208	Optimal	0	0	0	0	Good	LFT	2018-09-17	SO-2017.1	0
SO_C_20180718_O_1449.JPG	2018-07-18 14:13:09	58.57463056	-136.02184722	209	Optimal	0	0	0	0	Good	LFT	2018-09-17	SO-2017.1	0
SO_C_20180718_O_1450.JPG	2018-07-18 14:13:10	58.57464444	-136.02102500	210	Optimal	0	0	0	0	Good	LFT	2018-09-17	SO-2017.1	0
SO_C_20180718_O_1451.JPG	2018-07-18 14:13:11	58.57466111	-136.02019722	210	Optimal	0	0	0	0	Good	LFT	2018-09-18	SO-2017.1	0
SO_C_20180718_O_1452.JPG	2018-07-18 14:13:12	58.57467500	-136.01936389	211	Optimal	0	0	0	0	Good	LFT	2018-09-18	SO-2017.1	0
SO_C_20180718_O_1453.JPG	2018-07-18 14:13:13	58.57468889	-136.01851944	212	Optimal	0	0	0	0	Good	LFT	2018-09-18	SO-2017.1	0
SO_C_20180718_O_1454.JPG	2018-07-18 14:13:14	58.57469444	-136.01767222	212	Optimal	0	0	0	0	Good	LFT	2018-09-18	SO-2017.1	0
SO_C_20180718_O_1455.JPG	2018-07-18 14:13:15	58.57470833	-136.01682222	212	Optimal	0	0	0	0	Good	LFT	2018-09-18	SO-2017.1	0
SO_C_20180718_O_1456.JPG	2018-07-18 14:13:16	58.57472222	-136.01596667	212	Optimal	0	0	0	0	Good	LFT	2018-09-18	SO-2017.1	0
SO_C_20180718_O_1457.JPG	2018-07-18 14:13:17	58.57473056	-136.01510556	212	Optimal	0	0	0	0	Good	LFT	2018-09-18	SO-2017.1	0
SO_C_20180718_O_1458.JPG	2018-07-18 14:13:18	58.57474167	-136.01424444	212	Optimal	0	0	1	0	Good	LFT	2018-09-18	SO-2017.1	0
SO_C_20180718_O_1459.JPG	2018-07-18 14:13:19	58.57475278	-136.01338056	212	Optimal	0	0	0	0	Good	LFT	2018-09-18	SO-2017.1	0
SO_C_20180718_O_1460.JPG	2018-07-18 14:13:20	58.57476389	-136.01251944	212	Optimal	0	0	0	0	Good	LFT	2018-09-18	SO-2017.1	0
SO_C_20180718_O_1461.JPG	2018-07-18 14:13:21	58.57477500	-136.01165833	211	Optimal	0	0	1	0	Good	LFT	2018-09-18	SO-2017.1	0
SO_C_20180718_O_1462.JPG	2018-07-18 14:13:22	58.57478611	-136.01080000	211	Optimal	0	0	1	0	Good	LFT	2018-09-18	SO-2017.1	0
SO_C_20180718_O_1463.JPG	2018-07-18 14:13:23	58.57479444	-136.00994167	211	Optimal	0	0	0	0	Good	LFT	2018-09-18	SO-2017.1	0
SO_C_20180718_O_1464.JPG	2018-07-18 14:13:24	58.57480278	-136.00908611	211	Optimal	0	0	0	0	Good	LFT	2018-09-18	SO-2017.1	0
SO_C_20180718_O_1465.JPG	2018-07-18 14:13:25	58.57481389	-136.00822778	211	Optimal	0	0	0	0	Good	LFT	2018-09-18	SO-2017.1	0
SO_C_20180718_O_1466.JPG	2018-07-18 14:13:26	58.57482500	-136.00737222	212	Optimal	0	0	0	0	Good	LFT	2018-09-18	SO-2017.1	0
SO_C_20180718_O_1467.JPG	2018-07-18 14:13:27	58.57483611	-136.00651389	212	Optimal	0	0	0	0	Good	LFT	2018-09-18	SO-2017.1	0
SO_C_20180718_O_1468.JPG	2018-07-18 14:13:28	58.57484444	-136.00565278	212	Optimal	0	0	0	0	Good	LFT	2018-09-18	SO-2017.1	0
SO_C_20180718_O_1469.JPG	2018-07-18 14:13:29	58.57485556	-136.00479167	212	Optimal	0	0	0	0	Good	LFT	2018-09-18	SO-2017.1	0
SO_C_20180718_O_1470.JPG	2018-07-18 14:13:30	58.57486944	-136.00393333	212	Optimal	0	0	0	0	Good	LFT	2018-09-18	SO-2017.1	0
SO_C_20180718_O_1471.JPG	2018-07-18 14:13:31	58.57488333	-136.00306944	213	Optimal	0	0	0	0	Good	LFT	2018-09-18	SO-2017.1	0
SO_C_20180718_O_1472.JPG	2018-07-18 14:13:32	58.57489444	-136.00220556	213	Optimal	0	0	0	0	Good	LFT	2018-09-18	SO-2017.1	0
SO_C_20180718_O_1473.JPG	2018-07-18 14:13:33	58.57490833	-136.00133889	213	Optimal	0	0	0	0	Good	LFT	2018-09-18	SO-2017.1	0
SO_C_20180718_O_1474.JPG	2018-07-18 14:13:34	58.57492222	-136.00046944	213	Optimal	0	0	0	0	Good	LFT	2018-09-18	SO-2017.1	0
SO_C_20180718_O_1475.JPG	2018-07-18 14:13:35	58.57493333	-135.99960000	213	Optimal	0	0	0	0	Good	LFT	2018-09-18	SO-2017.1	0
SO_C_20180718_O_1476.JPG	2018-07-18 14:13:36	58.57494722	-135.99872778	214	Optimal	0	0	0	0	Good	LFT	2018-09-18	SO-2017.1	0
SO_C_20180718_O_1477.JPG	2018-07-18 14:13:37	58.57495556	-135.99785000	214	Optimal	0	0	1	0	Good	LFT	2018-09-18	SO-2017.1	0
SO_C_20180718_O_1478.JPG	2018-07-18 14:13:38	58.57496944	-135.99698056	214	Optimal	0	0	1	0	Good	LFT	2018-09-18	SO-2017.1	0
SO_C_20180718_O_1479.JPG	2018-07-18 14:13:39	58.57498333	-135.99610556	213	Optimal	0	0	0	0	Good	LFT	2018-09-18	SO-2017.1	0
SO_C_20180718_O_1480.JPG	2018-07-18 14:13:40	58.57499722	-135.99523056	213	Optimal	0	0	0	0	Good	LFT	2018-09-18	SO-2017.1	0
SO_C_20180718_O_1481.JPG	2018-07-18 14:13:41	58.57501111	-135.99435278	213	Optimal	0	0	0	0	Good	LFT	2018-09-18	SO-2017.1	0
SO_C_20180718_O_1482.JPG	2018-07-18 14:13:42	58.57502222	-135.99347500	212	Optimal	0	0	0	0	Good	LFT	2018-09-18	SO-2017.1	0
SO_C_20180718_O_1483.JPG	2018-07-18 14:13:43	58.57503333	-135.99259722	212	Optimal	0	0	0	0	Good	LFT	2018-09-18	SO-2017.1	0
SO_C_20180718_O_1484.JPG	2018-07-18 14:13:44	58.57504167	-135.99171667	212	Optimal	0	0	0	0	Good	LFT	2018-09-18	SO-2017.1	0
SO_C_20180718_O_1485.JPG	2018-07-18 14:13:45	58.57505278	-135.99083889	211	Optimal	0	0	0	0	Good	LFT	2018-09-18	SO-2017.1	0
SO_C_20180718_O_1486.JPG	2018-07-18 14:13:46	58.57506111	-135.98996111	211	Optimal	0	0	0	0	Good	LFT	2018-09-18	SO-2017.1	0
SO_C_20180718_O_1487.JPG	2018-07-18 14:13:47	58.57506944	-135.98908333	211	Optimal	0	0	0	0	Good	LFT	2018-09-18	SO-2017.1	0
SO_C_20180718_O_1488.JPG	2018-07-18 14:13:48	58.57508333	-135.98820278	210	Optimal	0	0	1	0	Good	LFT	2018-09-18	SO-2017.1	0
SO_C_20180718_O_1489.JPG	2018-07-18 14:13:49	58.57509722	-135.98733889	210	Optimal	0	0	1	0	Good	LFT	2018-09-18	SO-2017.1	0
SO_C_20180718_O_1490.JPG	2018-07-18 14:13:50	58.57511111	-135.98647500	209	Optimal	0	0	0	0	Good	LFT	2018-09-18	SO-2017.1	0
SO_C_20180718_O_1491.JPG	2018-07-18 14:13:51	58.57512778	-135.98561667	209	Optimal	0	0	0	0	Good	LFT	2018-09-18	SO-2017.1	0
SO_C_20180718_O_1492.JPG	2018-07-18 14:13:52	58.57514722	-135.98476667	208	Optimal	0	0	1	0	Good	LFT	2018-09-18	SO-2017.1	0
SO_C_20180718_O_1493.JPG	2018-07-18 14:13:53	58.57516944	-135.98391667	208	Optimal	0	0	0	0	Good	LFT	2018-09-18	SO-2017.1	0
SO_C_20180718_O_1494.JPG	2018-07-18 14:13:54	58.57518889	-135.98307500	207	Optimal	0	0	0	0	Good	LFT	2018-09-18	SO-2017.1	0
SO_C_20180718_O_1495.JPG	2018-07-18 14:13:55	58.57520833	-135.98223611	207	Optimal	0	0	0	0	Good	LFT	2018-09-18	SO-2017.1	0
SO_C_20180718_O_1496.JPG	2018-07-18 14:13:56	58.57523056	-135.98140000	207	Optimal	0	0	0	0	Good	LFT	2018-09-18	SO-2017.1	0
SO_C_20180718_O_1497.JPG	2018-07-18 14:13:57	58.57525000	-135.98056944	207	Optimal	0	0	0	0	Good	LFT	2018-09-18	SO-2017.1	0
SO_C_20180718_O_1498.JPG	2018-07-18 14:13:58	58.57526944	-135.97973889	207	Optimal	0	0	1	0	Good	LFT	2018-09-18	SO-2017.1	0
SO_C_20180718_O_1499.JPG	2018-07-18 14:13:59	58.57529167	-135.97891111	207	Optimal	0	0	1	0	Good	LFT	2018-09-18	SO-2017.1	0
SO_C_20180718_O_1500.JPG	2018-07-18 14:14:00	58.57530833	-135.97808611	207	Optimal	0	0	1	0	Good	LFT	2018-09-18	SO-2017.1	0
SO_C_20180718_O_1501.JPG	2018-07-18 14:14:01	58.57532500	-135.97726667	207	Optimal	0	0	1	0	Good	LFT	2018-09-18	SO-2017.1	0
SO_C_20180718_O_1502.JPG	2018-07-18 14:14:02	58.57534444	-135.97644444	207	Optimal	2	0	1	0	Good	LFT	2018-09-18	SO-2017.1	0
SO_C_20180718_O_1503.JPG	2018-07-18 14:14:03	58.57536111	-135.97562500	208	Optimal	2	0	1	0	Good	LFT	2018-09-18	SO-2017.1	0
SO_C_20180718_O_1504.JPG	2018-07-18 14:14:04	58.57537778	-135.97480833	208	Optimal	0	0	1	0	Good	LFT	2018-09-18	SO-2017.1	0
SO_C_20180718_O_1505.JPG	2018-07-18 14:14:05	58.57538889	-135.97398611	208	Optimal	0	0	1	0	Good	LFT	2018-09-18	SO-2017.1	0
SO_C_20180718_O_1506.JPG	2018-07-18 14:14:06	58.57539444	-135.97316667	208	Optimal	0	0	1	0	Good	LFT	2018-09-18	SO-2017.1	0
SO_C_20180718_O_1507.JPG	2018-07-18 14:14:07	58.57540000	-135.97234722	209	Optimal	0	0	1	0	Good	LFT	2018-09-18	SO-2017.1	0
SO_C_20180718_O_1508.JPG	2018-07-18 14:14:08	58.57540278	-135.97153056	209	Optimal	0	0	1	0	Good	LFT	2018-09-18	SO-2017.1	0
SO_C_20180718_O_1509.JPG	2018-07-18 14:14:09	58.57539722	-135.97071111	209	Optimal	0	0	1	1	Good	LFT	2018-09-18	SO-2017.1	0
SO_C_20180718_O_1510.JPG	2018-07-18 14:14:10	58.57538611	-135.96989444	209	Optimal	0	0	1	0	Good	LFT	2018-09-18	SO-2017.1	0
SO_C_20180718_O_1511.JPG	2018-07-18 14:14:11	58.57537500	-135.96908056	209	Optimal	0	0	1	0	Good	LFT	2018-09-18	SO-2017.1	0
SO_C_20180718_O_1512.JPG	2018-07-18 14:14:12	58.57536111	-135.96826667	209	Optimal	0	0	1	0	Good	LFT	2018-09-18	SO-2017.1	0
SO_C_20180718_O_1513.JPG	2018-07-18 14:14:13	58.57534167	-135.96745278	209	Optimal	0	0	1	0	Good	LFT	2018-09-18	SO-2017.1	0
SO_C_20180718_O_1514.JPG	2018-07-18 14:14:14	58.57532222	-135.96663889	209	Optimal	0	0	1	0	Good	LFT	2018-09-18	SO-2017.1	0
SO_C_20180718_O_1515.JPG	2018-07-18 14:14:15	58.57530833	-135.96582500	209	Optimal	0	0	1	1	Good	LFT	2018-09-18	SO-2017.1	0
SO_C_20180718_O_1516.JPG	2018-07-18 14:14:16	58.57529167	-135.96501111	210	Optimal	0	0	1	1	Good	LFT	2018-09-18	SO-2017.1	0
SO_C_20180718_O_1517.JPG	2018-07-18 14:14:17	58.57528056	-135.96420000	210	Optimal	0	0	1	0	Good	LFT	2018-09-18	SO-2017.1	0
SO_C_20180718_O_1518.JPG	2018-07-18 14:14:18	58.57526944	-135.96339167	210	Optimal	0	0	1	0	Good	LFT	2018-09-18	SO-2017.1	0
SO_C_20180718_O_1519.JPG	2018-07-18 14:14:19	58.57525556	-135.96258056	210	Optimal	0	0	1	0	Good	LFT	2018-09-18	SO-2017.1	0
SO_C_20180718_O_1520.JPG	2018-07-18 14:14:20	58.57524444	-135.96177222	210	Optimal	0	0	1	1	Good	LFT	2018-09-18	SO-2017.1	0
SO_C_20180718_O_1521.JPG	2018-07-18 14:14:21	58.57523056	-135.96096111	210	Optimal	0	0	1	1	Good	LFT	2018-09-18	SO-2017.1	0
SO_C_20180718_O_1522.JPG	2018-07-18 14:14:22	58.57521944	-135.96015000	210	Optimal	0	0	1	1	Good	LFT	2018-09-18	SO-2017.1	0
SO_C_20180718_O_1523.JPG	2018-07-18 14:14:23	58.57521111	-135.95934167	210	Optimal	0	0	0	1	Good	LFT	2018-09-18	SO-2017.1	0
SO_C_20180718_O_1524.JPG	2018-07-18 14:14:24	58.57520278	-135.95853333	210	Optimal	0	0	0	1	Good	LFT	2018-09-18	SO-2017.1	0
SO_C_20180718_O_1525.JPG	2018-07-18 14:14:25	58.57519722	-135.95772222	210	Optimal	0	0	0	1	Good	LFT	2018-09-18	SO-2017.1	0
SO_C_20180718_O_1526.JPG	2018-07-18 14:14:26	58.57519167	-135.95691111	210	Optimal	0	0	0	1	Good	LFT	2018-09-18	SO-2017.1	0
SO_C_20180718_O_1527.JPG	2018-07-18 14:14:27	58.57518889	-135.95609722	210	Optimal	0	0	0	1	Good	LFT	2018-09-18	SO-2017.1	0
SO_C_20180718_O_1528.JPG	2018-07-18 14:14:28	58.57518611	-135.95528056	210	Optimal	0	0	0	1	Good	LFT	2018-09-18	SO-2017.1	0
SO_C_20180718_O_1529.JPG	2018-07-18 14:14:29	58.57518611	-135.95446389	210	Optimal	0	0	0	1	Good	LFT	2018-09-18	SO-2017.1	0
SO_C_20180718_O_1530.JPG	2018-07-18 14:14:30	58.57518611	-135.95364722	209	Optimal	0	0	0	1	Good	LFT	2018-09-18	SO-2017.1	0
SO_C_20180718_O_1531.JPG	2018-07-18 14:14:31	58.57518611	-135.95283333	209	Optimal	0	0	0	1	Good	LFT	2018-09-18	SO-2017.1	0
SO_C_20180718_O_1532.JPG	2018-07-18 14:14:32	58.57518889	-135.95201389	209	Optimal	0	0	0	1	Good	LFT	2018-09-18	SO-2017.1	0
SO_C_20180718_O_1533.JPG	2018-07-18 14:14:33	58.57518889	-135.95119722	209	Optimal	0	0	0	1	Good	LFT	2018-09-18	SO-2017.1	0
SO_C_20180718_O_1534.JPG	2018-07-18 14:14:34	58.57519444	-135.95038333	209	Optimal	0	0	0	1	Good	LFT	2018-09-18	SO-2017.1	0
SO_C_20180718_O_1535.JPG	2018-07-18 14:14:35	58.57520278	-135.94956944	209	Optimal	0	0	0	0	Good	LFT	2018-09-18	SO-2017.1	0
SO_C_20180718_O_1536.JPG	2018-07-18 14:14:36	58.57521667	-135.94875833	209	Optimal	0	0	0	1	Good	LFT	2018-09-18	SO-2017.1	0
SO_C_20180718_O_1537.JPG	2018-07-18 14:14:37	58.57523333	-135.94794722	209	Optimal	0	0	1	1	Good	LFT	2018-09-18	SO-2017.1	0
SO_C_20180718_O_1538.JPG	2018-07-18 14:14:38	58.57525000	-135.94713611	209	Optimal	0	0	1	0	Good	LFT	2018-09-18	SO-2017.1	0
SO_C_20180718_O_1539.JPG	2018-07-18 14:14:39	58.57526944	-135.94632778	209	Optimal	0	0	1	0	Good	LFT	2018-09-18	SO-2017.1	0
SO_C_20180718_O_1540.JPG	2018-07-18 14:14:40	58.57529167	-135.94551944	209	Optimal	0	0	1	0	Good	LFT	2018-09-18	SO-2017.1	0
SO_C_20180718_O_1541.JPG	2018-07-18 14:14:41	58.57531389	-135.94471111	209	Optimal	0	0	1	0	Good	LFT	2018-09-18	SO-2017.1	0
SO_C_20180718_O_1542.JPG	2018-07-18 14:14:42	58.57533611	-135.94390000	209	Optimal	0	0	1	0	Good	LFT	2018-09-18	SO-2017.1	0
SO_C_20180718_O_1543.JPG	2018-07-18 14:14:43	58.57535833	-135.94309167	209	Optimal	0	0	1	0	Good	LFT	2018-09-18	SO-2017.1	0
SO_C_20180718_O_1544.JPG	2018-07-18 14:14:44	58.57538333	-135.94228056	210	Optimal	0	0	1	0	Good	LFT	2018-09-18	SO-2017.1	0
SO_C_20180718_O_1545.JPG	2018-07-18 14:14:45	58.57540556	-135.94146667	210	Optimal	0	0	1	0	Good	LFT	2018-09-18	SO-2017.1	0
SO_C_20180718_O_1546.JPG	2018-07-18 14:14:46	58.57542778	-135.94065000	210	Optimal	0	0	1	0	Good	LFT	2018-09-18	SO-2017.1	0
SO_C_20180718_O_1547.JPG	2018-07-18 14:14:47	58.57544722	-135.93982778	210	Optimal	0	0	1	0	Good	LFT	2018-09-18	SO-2017.1	0
SO_C_20180718_O_1548.JPG	2018-07-18 14:14:48	58.57546389	-135.93900833	210	Optimal	0	0	1	0	Good	LFT	2018-09-18	SO-2017.1	0
SO_C_20180718_O_1549.JPG	2018-07-18 14:14:49	58.57548056	-135.93818611	210	Optimal	0	0	1	0	Good	LFT	2018-09-18	SO-2017.1	0
SO_C_20180718_O_1550.JPG	2018-07-18 14:14:50	58.57549444	-135.93736389	210	Optimal	0	0	1	1	Good	LFT	2018-09-18	SO-2017.1	0
SO_C_20180718_O_1551.JPG	2018-07-18 14:14:51	58.57550833	-135.93654167	210	Optimal	0	0	1	1	Good	LFT	2018-09-18	SO-2017.1	0
SO_C_20180718_O_1552.JPG	2018-07-18 14:14:52	58.57551944	-135.93571944	210	Optimal	0	0	0	1	Good	LFT	2018-09-18	SO-2017.1	0
SO_C_20180718_O_1553.JPG	2018-07-18 14:14:53	58.57552778	-135.93489444	210	Optimal	0	0	0	1	Good	LFT	2018-09-18	SO-2017.1	0
SO_C_20180718_O_1554.JPG	2018-07-18 14:14:54	58.57553611	-135.93406944	210	Optimal	0	0	0	1	Good	LFT	2018-09-18	SO-2017.1	0
SO_C_20180718_O_1555.JPG	2018-07-18 14:14:55	58.57554167	-135.93324167	210	Optimal	0	0	0	1	Good	LFT	2018-09-18	SO-2017.1	0
SO_C_20180718_O_1556.JPG	2018-07-18 14:14:56	58.57554722	-135.93241389	210	Optimal	0	0	0	1	Good	LFT	2018-09-18	SO-2017.1	0
SO_C_20180718_O_1557.JPG	2018-07-18 14:14:57	58.57555000	-135.93158889	210	Optimal	0	0	0	1	Good	LFT	2018-09-18	SO-2017.1	0
SO_C_20180718_O_1558.JPG	2018-07-18 14:14:58	58.57555278	-135.93076389	210	Optimal	0	0	0	1	Good	LFT	2018-09-18	SO-2017.1	0
SO_C_20180718_O_1559.JPG	2018-07-18 14:14:59	58.57555833	-135.92993889	210	Optimal	0	0	0	1	Good	LFT	2018-09-18	SO-2017.1	0
SO_C_20180718_O_1560.JPG	2018-07-18 14:15:00	58.57556667	-135.92911389	209	Optimal	0	0	0	1	Good	LFT	2018-09-18	SO-2017.1	0
SO_C_20180718_O_1561.JPG	2018-07-18 14:15:01	58.57557778	-135.92829167	209	Optimal	0	0	0	1	Good	LFT	2018-09-18	SO-2017.1	0
SO_C_20180718_O_1562.JPG	2018-07-18 14:15:02	58.57558889	-135.92746944	209	Optimal	0	0	0	1	Good	LFT	2018-09-18	SO-2017.1	0
SO_C_20180718_O_1563.JPG	2018-07-18 14:15:03	58.57560000	-135.92664444	209	Optimal	0	0	0	1	Good	LFT	2018-09-18	SO-2017.1	0
SO_C_20180718_O_1564.JPG	2018-07-18 14:15:04	58.57561111	-135.92582500	209	Optimal	0	0	0	1	Good	LFT	2018-09-18	SO-2017.1	0
SO_C_20180718_O_1565.JPG	2018-07-18 14:15:05	58.57561944	-135.92500000	208	Optimal	0	0	0	1	Good	LFT	2018-09-18	SO-2017.1	0
SO_C_20180718_O_1566.JPG	2018-07-18 14:15:06	58.57563056	-135.92417222	208	Optimal	0	0	0	1	Good	LFT	2018-09-18	SO-2017.1	0
SO_C_20180718_O_1567.JPG	2018-07-18 14:15:07	58.57563611	-135.92334444	208	Optimal	0	0	0	1	Good	LFT	2018-09-18	SO-2017.1	0
SO_C_20180718_O_1568.JPG	2018-07-18 14:15:08	58.57563889	-135.92251667	208	Optimal	0	0	0	1	Good	LFT	2018-09-18	SO-2017.1	0
SO_C_20180718_O_1569.JPG	2018-07-18 14:15:09	58.57564444	-135.92169167	208	Optimal	0	0	0	1	Good	LFT	2018-09-18	SO-2017.1	0
SO_C_20180718_O_1570.JPG	2018-07-18 14:15:10	58.57565278	-135.92086389	208	Optimal	0	0	0	1	Good	LFT	2018-09-18	SO-2017.1	0
SO_C_20180718_O_1571.JPG	2018-07-18 14:15:11	58.57566111	-135.92004444	208	Optimal	0	0	0	1	Good	LFT	2018-09-18	SO-2017.1	0
SO_C_20180718_O_1572.JPG	2018-07-18 14:15:12	58.57566944	-135.91922222	208	Optimal	0	0	0	1	Good	LFT	2018-09-18	SO-2017.1	0
SO_C_20180718_O_1573.JPG	2018-07-18 14:15:13	58.57568333	-135.91840278	209	Optimal	0	0	0	1	Good	LFT	2018-09-18	SO-2017.1	0
SO_C_20180718_O_1574.JPG	2018-07-18 14:15:14	58.57570000	-135.91758056	209	Optimal	0	0	0	1	Good	LFT	2018-09-18	SO-2017.1	0
SO_C_20180718_O_1575.JPG	2018-07-18 14:15:15	58.57571667	-135.91675556	209	Optimal	0	0	0	1	Good	LFT	2018-09-18	SO-2017.1	0
SO_C_20180718_O_1576.JPG	2018-07-18 14:15:16	58.57573056	-135.91592778	210	Optimal	0	0	0	1	Good	LFT	2018-09-18	SO-2017.1	0
SO_C_20180718_O_1577.JPG	2018-07-18 14:15:17	58.57574167	-135.91509444	210	Optimal	0	0	0	1	Good	LFT	2018-09-18	SO-2017.1	0
SO_C_20180718_O_1578.JPG	2018-07-18 14:15:18	58.57575833	-135.91425833	211	Optimal	0	0	0	1	Good	LFT	2018-09-18	SO-2017.1	0
SO_C_20180718_O_1579.JPG	2018-07-18 14:15:19	58.57577500	-135.91341667	211	Optimal	0	0	0	1	Good	LFT	2018-09-18	SO-2017.1	0
SO_C_20180718_O_1580.JPG	2018-07-18 14:15:20	58.57579167	-135.91257222	211	Optimal	0	0	0	1	Good	LFT	2018-09-18	SO-2017.1	0
SO_C_20180718_O_1581.JPG	2018-07-18 14:15:21	58.57580833	-135.91172222	211	Optimal	0	0	0	1	Good	LFT	2018-09-18	SO-2017.1	0
SO_C_20180718_O_1582.JPG	2018-07-18 14:15:22	58.57582500	-135.91086944	210	Optimal	0	0	0	1	Good	LFT	2018-09-18	SO-2017.1	0
SO_C_20180718_O_1583.JPG	2018-07-18 14:15:23	58.57584444	-135.91001944	209	Optimal	0	0	0	1	Good	LFT	2018-09-18	SO-2017.1	0
SO_C_20180718_O_1584.JPG	2018-07-18 14:15:24	58.57586111	-135.90916944	208	Optimal	0	0	1	1	Good	LFT	2018-09-18	SO-2017.1	0
SO_C_20180718_O_1585.JPG	2018-07-18 14:15:25	58.57587500	-135.90832222	207	Optimal	0	0	1	0	Good	LFT	2018-09-18	SO-2017.1	0
SO_C_20180718_O_1586.JPG	2018-07-18 14:15:26	58.57588333	-135.90748056	206	Optimal	0	0	1	0	Good	LFT	2018-09-18	SO-2017.1	0
SO_C_20180718_O_1587.JPG	2018-07-18 14:15:27	58.57588611	-135.90664167	206	Optimal	0	0	1	0	Good	LFT	2018-09-18	SO-2017.1	0
SO_C_20180718_O_1588.JPG	2018-07-18 14:15:28	58.57588611	-135.90580556	205	Optimal	0	0	1	0	Good	LFT	2018-09-18	SO-2017.1	0
SO_C_20180718_O_1589.JPG	2018-07-18 14:15:29	58.57588056	-135.90497222	205	Optimal	0	0	1	1	Good	LFT	2018-09-18	SO-2017.1	0
SO_C_20180718_O_1590.JPG	2018-07-18 14:15:30	58.57587500	-135.90413889	205	Optimal	0	0	1	1	Good	LFT	2018-09-18	SO-2017.1	0
SO_C_20180718_O_1591.JPG	2018-07-18 14:15:31	58.57586389	-135.90330833	205	Optimal	0	0	0	1	Good	LFT	2018-09-18	SO-2017.1	0
SO_C_20180718_O_1592.JPG	2018-07-18 14:15:32	58.57585278	-135.90247778	206	Optimal	0	0	0	1	Good	LFT	2018-09-18	SO-2017.1	0
SO_C_20180718_O_1593.JPG	2018-07-18 14:15:33	58.57584444	-135.90164167	207	Optimal	0	0	0	1	Good	LFT	2018-09-18	SO-2017.1	0
SO_C_20180718_O_1594.JPG	2018-07-18 14:15:34	58.57582500	-135.90080278	207	Optimal	0	0	0	1	Good	LFT	2018-09-18	SO-2017.1	0
SO_C_20180718_O_1595.JPG	2018-07-18 14:15:35	58.57581111	-135.89996111	208	Optimal	0	0	0	1	Good	LFT	2018-09-18	SO-2017.1	0
SO_C_20180718_O_1596.JPG	2018-07-18 14:15:36	58.57579167	-135.89911389	209	Optimal	0	0	0	1	Good	LFT	2018-09-18	SO-2017.1	0
SO_C_20180718_O_1597.JPG	2018-07-18 14:15:37	58.57577500	-135.89826667	209	Optimal	0	0	0	1	Good	LFT	2018-09-18	SO-2017.1	0
SO_C_20180718_O_1598.JPG	2018-07-18 14:18:08	58.60527500	-135.82742222	211	Optimal	0	0	0	1	Good	LFT	2018-09-18	SO-2017.1	0
SO_C_20180718_O_1599.JPG	2018-07-18 14:18:09	58.60521389	-135.82820000	211	Optimal	0	0	0	1	Good	LFT	2018-09-18	SO-2017.1	0
SO_C_20180718_O_1600.JPG	2018-07-18 14:18:10	58.60515278	-135.82897778	211	Optimal	0	0	0	1	Good	LFT	2018-09-18	SO-2017.1	0
SO_C_20180718_O_1601.JPG	2018-07-18 14:18:11	58.60508611	-135.82975833	212	Optimal	0	0	0	1	Good	LFT	2018-09-18	SO-2017.1	0
SO_C_20180718_O_1602.JPG	2018-07-18 14:18:12	58.60502500	-135.83054444	213	Optimal	0	0	0	1	Good	LFT	2018-09-18	SO-2017.1	0
SO_C_20180718_O_1603.JPG	2018-07-18 14:18:13	58.60496944	-135.83133889	213	Optimal	0	0	0	1	Good	LFT	2018-09-18	SO-2017.1	0
SO_C_20180718_O_1604.JPG	2018-07-18 14:18:14	58.60491667	-135.83213889	213	Optimal	0	0	0	1	Good	LFT	2018-09-18	SO-2017.1	0
SO_C_20180718_O_1605.JPG	2018-07-18 14:18:15	58.60486944	-135.83294444	213	Optimal	0	0	0	1	Good	LFT	2018-09-18	SO-2017.1	0
SO_C_20180718_O_1606.JPG	2018-07-18 14:18:16	58.60482222	-135.83375278	213	Optimal	0	0	0	1	Good	LFT	2018-09-18	SO-2017.1	0
SO_C_20180718_O_1607.JPG	2018-07-18 14:18:17	58.60478611	-135.83456944	213	Optimal	0	0	0	1	Good	LFT	2018-09-18	SO-2017.1	0
SO_C_20180718_O_1608.JPG	2018-07-18 14:18:18	58.60475833	-135.83538889	212	Optimal	0	0	0	1	Good	LFT	2018-09-18	SO-2017.1	0
SO_C_20180718_O_1609.JPG	2018-07-18 14:18:19	58.60473333	-135.83620833	211	Optimal	0	0	0	1	Good	LFT	2018-09-18	SO-2017.1	0
SO_C_20180718_O_1610.JPG	2018-07-18 14:18:20	58.60470833	-135.83702778	210	Optimal	0	0	0	1	Good	LFT	2018-09-18	SO-2017.1	0
SO_C_20180718_O_1611.JPG	2018-07-18 14:18:21	58.60468056	-135.83784444	209	Optimal	0	0	0	1	Good	LFT	2018-09-18	SO-2017.1	0
SO_C_20180718_O_1612.JPG	2018-07-18 14:18:22	58.60465556	-135.83866111	208	Optimal	0	0	0	1	Good	LFT	2018-09-18	SO-2017.1	0
SO_C_20180718_O_1613.JPG	2018-07-18 14:18:23	58.60463056	-135.83947222	208	Optimal	0	0	0	1	Good	LFT	2018-09-18	SO-2017.1	0
SO_C_20180718_O_1614.JPG	2018-07-18 14:18:24	58.60460556	-135.84028056	207	Optimal	0	0	0	1	Good	LFT	2018-09-18	SO-2017.1	0
SO_C_20180718_O_1615.JPG	2018-07-18 14:18:25	58.60458611	-135.84108889	207	Optimal	0	0	0	1	Good	LFT	2018-09-18	SO-2017.1	0
SO_C_20180718_O_1616.JPG	2018-07-18 14:18:26	58.60456389	-135.84189444	207	Optimal	0	0	0	1	Good	LFT	2018-09-18	SO-2017.1	0
SO_C_20180718_O_1617.JPG	2018-07-18 14:18:27	58.60454167	-135.84270000	207	Optimal	0	0	0	1	Good	LFT	2018-09-18	SO-2017.1	0
SO_C_20180718_O_1618.JPG	2018-07-18 14:18:28	58.60451944	-135.84350833	207	Optimal	0	0	0	1	Good	LFT	2018-09-18	SO-2017.1	0
SO_C_20180718_O_1619.JPG	2018-07-18 14:18:29	58.60449444	-135.84431667	208	Optimal	0	0	0	1	Good	LFT	2018-09-18	SO-2017.1	0
SO_C_20180718_O_1620.JPG	2018-07-18 14:18:30	58.60446944	-135.84512500	208	Optimal	0	0	0	1	Good	LFT	2018-09-18	SO-2017.1	0
SO_C_20180718_O_1621.JPG	2018-07-18 14:18:31	58.60444167	-135.84593611	208	Optimal	0	0	0	1	Good	LFT	2018-09-18	SO-2017.1	0
SO_C_20180718_O_1622.JPG	2018-07-18 14:18:32	58.60441389	-135.84675000	208	Optimal	0	0	0	1	Good	LFT	2018-09-18	SO-2017.1	0
SO_C_20180718_O_1623.JPG	2018-07-18 14:18:33	58.60438611	-135.84756111	208	Optimal	0	0	0	1	Good	LFT	2018-09-18	SO-2017.1	0
SO_C_20180718_O_1624.JPG	2018-07-18 14:18:34	58.60435833	-135.84837500	208	Optimal	0	0	0	0	Good	LFT	2018-09-18	SO-2017.1	0
SO_C_20180718_O_1625.JPG	2018-07-18 14:18:35	58.60432778	-135.84919167	208	Optimal	0	0	0	1	Good	LFT	2018-09-18	SO-2017.1	0
SO_C_20180718_O_1626.JPG	2018-07-18 14:18:36	58.60429722	-135.85000833	208	Optimal	0	0	0	1	Good	LFT	2018-09-18	SO-2017.1	0
SO_C_20180718_O_1627.JPG	2018-07-18 14:18:37	58.60426389	-135.85082778	208	Optimal	0	0	0	1	Good	LFT	2018-09-18	SO-2017.1	0
SO_C_20180718_O_1628.JPG	2018-07-18 14:18:38	58.60423056	-135.85164444	207	Optimal	0	0	1	1	Good	LFT	2018-09-18	SO-2017.1	0
SO_C_20180718_O_1629.JPG	2018-07-18 14:18:39	58.60419167	-135.85246111	207	Optimal	0	0	1	1	Good	LFT	2018-09-18	SO-2017.1	0
SO_C_20180718_O_1630.JPG	2018-07-18 14:18:40	58.60415556	-135.85327500	207	Optimal	0	0	1	1	Good	LFT	2018-09-18	SO-2017.1	0
SO_C_20180718_O_1631.JPG	2018-07-18 14:18:41	58.60411667	-135.85408889	207	Optimal	0	0	0	1	Good	LFT	2018-09-18	SO-2017.1	0
SO_C_20180718_O_1632.JPG	2018-07-18 14:18:42	58.60407500	-135.85490000	207	Optimal	0	0	0	1	Good	LFT	2018-09-18	SO-2017.1	0
SO_C_20180718_O_1633.JPG	2018-07-18 14:18:43	58.60403056	-135.85571667	207	Optimal	0	0	0	1	Good	LFT	2018-09-18	SO-2017.1	0
SO_C_20180718_O_1634.JPG	2018-07-18 14:18:44	58.60398333	-135.85653333	206	Optimal	0	0	0	1	Good	LFT	2018-09-18	SO-2017.1	0
SO_C_20180718_O_1635.JPG	2018-07-18 14:18:45	58.60393611	-135.85735278	206	Optimal	0	0	0	1	Good	LFT	2018-09-18	SO-2017.1	0
SO_C_20180718_O_1636.JPG	2018-07-18 14:18:46	58.60388889	-135.85817222	206	Optimal	0	0	0	1	Good	LFT	2018-09-18	SO-2017.1	0
SO_C_20180718_O_1637.JPG	2018-07-18 14:18:47	58.60384167	-135.85899722	206	Optimal	0	0	0	1	Good	LFT	2018-09-18	SO-2017.1	0
SO_C_20180718_O_1638.JPG	2018-07-18 14:18:48	58.60379444	-135.85982222	206	Optimal	0	0	0	1	Good	LFT	2018-09-18	SO-2017.1	0
SO_C_20180718_O_1639.JPG	2018-07-18 14:18:49	58.60374444	-135.86064722	206	Optimal	0	0	0	1	Good	LFT	2018-09-18	SO-2017.1	0
SO_C_20180718_O_1640.JPG	2018-07-18 14:18:50	58.60369444	-135.86147500	206	Optimal	0	0	0	1	Good	LFT	2018-09-18	SO-2017.1	0
SO_C_20180718_O_1641.JPG	2018-07-18 14:18:51	58.60364444	-135.86230278	205	Optimal	0	0	0	1	Good	LFT	2018-09-18	SO-2017.1	0
SO_C_20180718_O_1642.JPG	2018-07-18 14:18:52	58.60359167	-135.86312778	205	Optimal	0	0	0	1	Good	LFT	2018-09-18	SO-2017.1	0
SO_C_20180718_O_1643.JPG	2018-07-18 14:18:53	58.60354167	-135.86395278	205	Optimal	0	0	0	1	Good	LFT	2018-09-18	SO-2017.1	0
SO_C_20180718_O_1644.JPG	2018-07-18 14:18:54	58.60349167	-135.86478056	205	Optimal	0	0	0	1	Good	LFT	2018-09-18	SO-2017.1	0
SO_C_20180718_O_1645.JPG	2018-07-18 14:18:55	58.60343889	-135.86560556	204	Optimal	0	0	1	1	Good	LFT	2018-09-18	SO-2017.1	0
SO_C_20180718_O_1646.JPG	2018-07-18 14:18:56	58.60338333	-135.86643056	204	Optimal	0	0	0	1	Good	LFT	2018-09-18	SO-2017.1	0
SO_C_20180718_O_1647.JPG	2018-07-18 14:18:57	58.60332778	-135.86725278	204	Optimal	0	0	0	1	Good	LFT	2018-09-18	SO-2017.1	0
SO_C_20180718_O_1648.JPG	2018-07-18 14:18:58	58.60326944	-135.86807778	204	Optimal	0	0	0	1	Good	LFT	2018-09-18	SO-2017.1	0
SO_C_20180718_O_1649.JPG	2018-07-18 14:18:59	58.60320833	-135.86889722	204	Optimal	0	0	0	1	Good	LFT	2018-09-18	SO-2017.1	0
SO_C_20180718_O_1650.JPG	2018-07-18 14:19:00	58.60314722	-135.86971667	204	Optimal	0	0	1	1	Good	LFT	2018-09-18	SO-2017.1	0
SO_C_20180718_O_1651.JPG	2018-07-18 14:19:01	58.60308333	-135.87053889	204	Optimal	0	0	1	1	Good	LFT	2018-09-18	SO-2017.1	0
SO_C_20180718_O_1652.JPG	2018-07-18 14:19:02	58.60302500	-135.87135833	204	Optimal	0	0	1	1	Good	LFT	2018-09-18	SO-2017.1	0
SO_C_20180718_O_1653.JPG	2018-07-18 14:19:03	58.60296389	-135.87218056	204	Optimal	0	0	0	1	Good	LFT	2018-09-18	SO-2017.1	0
SO_C_20180718_O_1654.JPG	2018-07-18 14:19:04	58.60290556	-135.87300000	204	Optimal	0	0	0	1	Good	LFT	2018-09-18	SO-2017.1	0
SO_C_20180718_O_1655.JPG	2018-07-18 14:19:05	58.60285833	-135.87381944	204	Optimal	0	0	0	1	Good	LFT	2018-09-18	SO-2017.1	0
SO_C_20180718_O_1656.JPG	2018-07-18 14:19:06	58.60282222	-135.87463889	204	Optimal	0	0	0	1	Good	LFT	2018-09-18	SO-2017.1	0
SO_C_20180718_O_1657.JPG	2018-07-18 14:19:07	58.60280000	-135.87546111	204	Optimal	0	0	0	1	Good	LFT	2018-09-18	SO-2017.1	0
SO_C_20180718_O_1658.JPG	2018-07-18 14:19:08	58.60279722	-135.87628333	203	Optimal	0	0	0	1	Good	LFT	2018-09-18	SO-2017.1	0
SO_C_20180718_O_1659.JPG	2018-07-18 14:19:09	58.60281389	-135.87710000	203	Optimal	0	0	0	1	Good	LFT	2018-09-18	SO-2017.1	0
SO_C_20180718_O_1660.JPG	2018-07-18 14:19:10	58.60285278	-135.87790833	203	Optimal	0	0	0	1	Good	LFT	2018-09-18	SO-2017.1	0
SO_C_20180718_O_1661.JPG	2018-07-18 14:19:11	58.60291944	-135.87870833	203	Optimal	0	0	0	1	Good	LFT	2018-09-18	SO-2017.1	0
SO_C_20180718_O_1662.JPG	2018-07-18 14:19:12	58.60300833	-135.87949722	202	Optimal	0	0	0	1	Good	LFT	2018-09-18	SO-2017.1	0
SO_C_20180718_O_1663.JPG	2018-07-18 14:19:13	58.60311667	-135.88027778	202	Optimal	0	0	0	1	Good	LFT	2018-09-18	SO-2017.1	0
SO_C_20180718_O_1664.JPG	2018-07-18 14:19:14	58.60324167	-135.88104444	201	Optimal	0	0	0	1	Good	LFT	2018-09-18	SO-2017.1	0
SO_C_20180718_O_1665.JPG	2018-07-18 14:19:15	58.60337778	-135.88180000	201	Optimal	0	0	0	1	Good	LFT	2018-09-18	SO-2017.1	0
SO_C_20180718_O_1666.JPG	2018-07-18 14:19:16	58.60351944	-135.88254722	201	Optimal	0	0	0	1	Good	LFT	2018-09-18	SO-2017.1	0
SO_C_20180718_O_1667.JPG	2018-07-18 14:19:17	58.60366667	-135.88328333	200	Optimal	0	0	0	1	Good	LFT	2018-09-18	SO-2017.1	0
SO_C_20180718_O_1668.JPG	2018-07-18 14:19:18	58.60381667	-135.88401111	200	Optimal	0	0	0	1	Good	LFT	2018-09-18	SO-2017.1	0
SO_C_20180718_O_1669.JPG	2018-07-18 14:19:19	58.60396667	-135.88473056	200	Optimal	0	0	0	1	Good	LFT	2018-09-18	SO-2017.1	0
SO_C_20180718_O_1670.JPG	2018-07-18 14:19:20	58.60411389	-135.88544444	200	Optimal	0	0	0	1	Good	LFT	2018-09-18	SO-2017.1	0
SO_C_20180718_O_1671.JPG	2018-07-18 14:19:21	58.60425000	-135.88616111	200	Optimal	0	0	0	1	Good	LFT	2018-09-18	SO-2017.1	0
SO_C_20180718_O_1672.JPG	2018-07-18 14:19:22	58.60437778	-135.88687778	201	Optimal	0	0	0	1	Good	LFT	2018-09-18	SO-2017.1	0
SO_C_20180718_O_1673.JPG	2018-07-18 14:19:23	58.60449167	-135.88759722	201	Optimal	0	0	0	1	Good	LFT	2018-09-18	SO-2017.1	0
SO_C_20180718_O_1674.JPG	2018-07-18 14:19:24	58.60459444	-135.88832222	202	Optimal	0	0	0	1	Good	LFT	2018-09-18	SO-2017.1	0
SO_C_20180718_O_1675.JPG	2018-07-18 14:19:25	58.60467778	-135.88905556	204	Optimal	0	0	0	1	Good	LFT	2018-09-18	SO-2017.1	0
SO_C_20180718_O_1676.JPG	2018-07-18 14:19:26	58.60473889	-135.88979722	205	Optimal	0	0	0	1	Good	LFT	2018-09-18	SO-2017.1	0
SO_C_20180718_O_1677.JPG	2018-07-18 14:19:27	58.60478333	-135.89054722	206	Optimal	0	0	0	1	Good	LFT	2018-09-18	SO-2017.1	0
SO_C_20180718_O_1678.JPG	2018-07-18 14:19:28	58.60481111	-135.89130000	207	Optimal	0	0	0	1	Good	LFT	2018-09-18	SO-2017.1	0
SO_C_20180718_O_1679.JPG	2018-07-18 14:19:29	58.60482500	-135.89205556	208	Optimal	0	0	0	1	Good	LFT	2018-09-18	SO-2017.1	0
SO_C_20180718_O_1680.JPG	2018-07-18 14:19:30	58.60483056	-135.89281111	209	Optimal	0	0	0	1	Good	LFT	2018-09-18	SO-2017.1	0
SO_C_20180718_O_1681.JPG	2018-07-18 14:19:31	58.60483333	-135.89356667	209	Optimal	0	0	1	1	Good	LFT	2018-09-18	SO-2017.1	0
SO_C_20180718_O_1682.JPG	2018-07-18 14:19:32	58.60483056	-135.89432500	210	Optimal	0	0	1	1	Good	LFT	2018-09-18	SO-2017.1	0
SO_C_20180718_O_1683.JPG	2018-07-18 14:19:33	58.60482500	-135.89508611	210	Optimal	0	0	0	0	Good	LFT	2018-09-18	SO-2017.1	0
SO_C_20180718_O_1684.JPG	2018-07-18 14:19:34	58.60481667	-135.89585000	210	Optimal	0	0	0	0	Good	LFT	2018-09-18	SO-2017.1	0
SO_C_20180718_O_1685.JPG	2018-07-18 14:19:35	58.60480556	-135.89661389	210	Optimal	0	0	0	0	Good	LFT	2018-09-18	SO-2017.1	0
SO_C_20180718_O_1686.JPG	2018-07-18 14:19:36	58.60479167	-135.89738056	210	Optimal	0	0	0	0	Good	LFT	2018-09-18	SO-2017.1	0
SO_C_20180718_O_1687.JPG	2018-07-18 14:19:37	58.60477222	-135.89814722	210	Optimal	0	0	0	0	Good	LFT	2018-09-18	SO-2017.1	0
SO_C_20180718_O_1688.JPG	2018-07-18 14:19:38	58.60475000	-135.89891389	209	Optimal	0	0	0	0	Good	LFT	2018-09-18	SO-2017.1	0
SO_C_20180718_O_1689.JPG	2018-07-18 14:19:39	58.60471944	-135.89968056	209	Optimal	0	0	0	0	Good	LFT	2018-09-18	SO-2017.1	0
SO_C_20180718_O_1690.JPG	2018-07-18 14:19:40	58.60468611	-135.90044444	208	Optimal	0	0	0	0	Good	LFT	2018-09-18	SO-2017.1	0
SO_C_20180718_O_1691.JPG	2018-07-18 14:19:41	58.60464722	-135.90120833	208	Optimal	0	0	0	0	Good	LFT	2018-09-18	SO-2017.1	0
SO_C_20180718_O_1692.JPG	2018-07-18 14:19:42	58.60460833	-135.90197222	207	Optimal	0	0	0	0	Good	LFT	2018-09-18	SO-2017.1	0
SO_C_20180718_O_1693.JPG	2018-07-18 14:19:43	58.60456944	-135.90273056	207	Optimal	0	0	0	0	Good	LFT	2018-09-18	SO-2017.1	0
SO_C_20180718_O_1694.JPG	2018-07-18 14:19:44	58.60453611	-135.90349167	207	Optimal	0	0	0	0	Good	LFT	2018-09-18	SO-2017.1	0
SO_C_20180718_O_1695.JPG	2018-07-18 14:19:45	58.60450278	-135.90424722	207	Optimal	0	0	0	0	Good	LFT	2018-09-18	SO-2017.1	0
SO_C_20180718_O_1696.JPG	2018-07-18 14:19:46	58.60446944	-135.90500278	206	Optimal	0	0	0	0	Good	LFT	2018-09-18	SO-2017.1	0
SO_C_20180718_O_1697.JPG	2018-07-18 14:19:47	58.60443889	-135.90575556	206	Optimal	0	0	0	0	Good	LFT	2018-09-18	SO-2017.1	0
SO_C_20180718_O_1698.JPG	2018-07-18 14:19:48	58.60441111	-135.90651111	207	Optimal	0	0	0	0	Good	LFT	2018-09-18	SO-2017.1	0
SO_C_20180718_O_1699.JPG	2018-07-18 14:19:49	58.60438333	-135.90726111	207	Optimal	0	0	0	0	Good	LFT	2018-09-18	SO-2017.1	0
SO_C_20180718_O_1700.JPG	2018-07-18 14:19:50	58.60436111	-135.90801667	207	Optimal	0	0	0	0	Good	LFT	2018-09-18	SO-2017.1	0
SO_C_20180718_O_1701.JPG	2018-07-18 14:19:51	58.60434444	-135.90876944	207	Optimal	0	0	0	0	Good	LFT	2018-09-18	SO-2017.1	0
SO_C_20180718_O_1702.JPG	2018-07-18 14:19:52	58.60433056	-135.90952222	208	Optimal	0	0	0	0	Good	LFT	2018-09-18	SO-2017.1	0
SO_C_20180718_O_1703.JPG	2018-07-18 14:19:53	58.60432500	-135.91027500	208	Optimal	0	0	0	0	Good	LFT	2018-09-18	SO-2017.1	0
SO_C_20180718_O_1704.JPG	2018-07-18 14:19:54	58.60432500	-135.91103056	208	Optimal	0	0	0	0	Good	LFT	2018-09-18	SO-2017.1	0
SO_C_20180718_O_1705.JPG	2018-07-18 14:19:55	58.60432778	-135.91178333	209	Optimal	0	0	0	0	Good	LFT	2018-09-18	SO-2017.1	0
SO_C_20180718_O_1706.JPG	2018-07-18 14:19:56	58.60433056	-135.91253333	209	Optimal	0	0	0	0	Good	LFT	2018-09-18	SO-2017.1	0
SO_C_20180718_O_1707.JPG	2018-07-18 14:19:57	58.60433333	-135.91328333	209	Optimal	0	0	0	0	Good	LFT	2018-09-18	SO-2017.1	0
SO_C_20180718_O_1708.JPG	2018-07-18 14:19:58	58.60433611	-135.91403333	209	Optimal	0	0	0	0	Good	LFT	2018-09-18	SO-2017.1	0
SO_C_20180718_O_1709.JPG	2018-07-18 14:19:59	58.60433611	-135.91478056	209	Optimal	0	0	0	0	Good	LFT	2018-09-18	SO-2017.1	0
SO_C_20180718_O_1710.JPG	2018-07-18 14:20:00	58.60433889	-135.91552500	209	Optimal	0	0	0	0	Good	LFT	2018-09-18	SO-2017.1	0
SO_C_20180718_O_1711.JPG	2018-07-18 14:20:01	58.60434167	-135.91626667	210	Optimal	0	0	0	0	Good	LFT	2018-09-18	SO-2017.1	0
SO_C_20180718_O_1712.JPG	2018-07-18 14:20:02	58.60434444	-135.91700833	210	Optimal	0	0	0	0	Good	LFT	2018-09-18	SO-2017.1	0
SO_C_20180718_O_1713.JPG	2018-07-18 14:20:03	58.60435000	-135.91775000	210	Optimal	0	0	0	0	Good	LFT	2018-09-18	SO-2017.1	0
SO_C_20180718_O_1714.JPG	2018-07-18 14:20:04	58.60435278	-135.91848889	210	Optimal	0	0	0	0	Good	LFT	2018-09-18	SO-2017.1	0
SO_C_20180718_O_1715.JPG	2018-07-18 14:20:05	58.60435833	-135.91922778	211	Optimal	0	0	0	0	Good	LFT	2018-09-18	SO-2017.1	0
SO_C_20180718_O_1716.JPG	2018-07-18 14:20:06	58.60435833	-135.91996944	211	Optimal	0	0	0	0	Good	LFT	2018-09-18	SO-2017.1	0
SO_C_20180718_O_1717.JPG	2018-07-18 14:20:07	58.60435833	-135.92071111	212	Optimal	0	0	1	0	Good	LFT	2018-09-18	SO-2017.1	0
SO_C_20180718_O_1718.JPG	2018-07-18 14:20:08	58.60435833	-135.92145556	212	Optimal	0	0	1	0	Good	LFT	2018-09-18	SO-2017.1	0
SO_C_20180718_O_1719.JPG	2018-07-18 14:20:09	58.60435556	-135.92220278	213	Optimal	0	0	0	0	Good	LFT	2018-09-18	SO-2017.1	0
SO_C_20180718_O_1720.JPG	2018-07-18 14:20:10	58.60435000	-135.92295556	213	Optimal	0	0	0	0	Good	LFT	2018-09-18	SO-2017.1	0
SO_C_20180718_O_1721.JPG	2018-07-18 14:20:11	58.60433889	-135.92370833	213	Optimal	0	0	1	0	Good	LFT	2018-09-18	SO-2017.1	0
SO_C_20180718_O_1722.JPG	2018-07-18 14:20:12	58.60432778	-135.92446389	214	Optimal	0	0	1	0	Good	LFT	2018-09-18	SO-2017.1	0
SO_C_20180718_O_1723.JPG	2018-07-18 14:20:13	58.60431389	-135.92522222	214	Optimal	0	0	0	0	Good	LFT	2018-09-18	SO-2017.1	0
SO_C_20180718_O_1724.JPG	2018-07-18 14:20:14	58.60430000	-135.92597778	214	Optimal	0	0	0	0	Good	LFT	2018-09-18	SO-2017.1	0
SO_C_20180718_O_1725.JPG	2018-07-18 14:20:15	58.60428333	-135.92673611	214	Optimal	0	0	0	0	Good	LFT	2018-09-18	SO-2017.1	0
SO_C_20180718_O_1726.JPG	2018-07-18 14:20:16	58.60426389	-135.92749444	214	Optimal	0	0	0	0	Good	LFT	2018-09-18	SO-2017.1	0
SO_C_20180718_O_1727.JPG	2018-07-18 14:20:17	58.60424444	-135.92825278	215	Optimal	0	0	0	0	Good	LFT	2018-09-18	SO-2017.1	0
SO_C_20180718_O_1728.JPG	2018-07-18 14:20:18	58.60422500	-135.92901667	215	Optimal	0	0	0	0	Good	LFT	2018-09-18	SO-2017.1	0
SO_C_20180718_O_1729.JPG	2018-07-18 14:20:19	58.60420556	-135.92978056	216	Optimal	0	0	1	0	Good	LFT	2018-09-18	SO-2017.1	0
SO_C_20180718_O_1730.JPG	2018-07-18 14:20:20	58.60418889	-135.93054722	216	Optimal	0	0	1	0	Good	LFT	2018-09-18	SO-2017.1	0
SO_C_20180718_O_1731.JPG	2018-07-18 14:20:21	58.60416944	-135.93132222	217	Optimal	0	0	1	0	Good	LFT	2018-09-18	SO-2017.1	0
SO_C_20180718_O_1732.JPG	2018-07-18 14:20:22	58.60415278	-135.93209722	217	Optimal	0	0	1	0	Good	LFT	2018-09-18	SO-2017.1	0
SO_C_20180718_O_1733.JPG	2018-07-18 14:20:23	58.60413611	-135.93287778	217	Optimal	0	0	0	0	Good	LFT	2018-09-18	SO-2017.1	0
SO_C_20180718_O_1734.JPG	2018-07-18 14:20:24	58.60411944	-135.93366111	218	Optimal	0	0	0	0	Good	LFT	2018-09-18	SO-2017.1	0
SO_C_20180718_O_1735.JPG	2018-07-18 14:20:25	58.60410000	-135.93444722	218	Optimal	0	0	0	0	Good	LFT	2018-09-18	SO-2017.1	0
SO_C_20180718_O_1736.JPG	2018-07-18 14:20:26	58.60408333	-135.93523889	218	Optimal	0	0	0	0	Good	LFT	2018-09-18	SO-2017.1	0
SO_C_20180718_O_1737.JPG	2018-07-18 14:20:27	58.60406667	-135.93603333	218	Optimal	0	0	0	0	Good	LFT	2018-09-18	SO-2017.1	0
SO_C_20180718_O_1738.JPG	2018-07-18 14:20:28	58.60405000	-135.93683333	218	Optimal	0	0	0	0	Good	LFT	2018-09-18	SO-2017.1	0
SO_C_20180718_O_1739.JPG	2018-07-18 14:20:29	58.60403611	-135.93763611	218	Optimal	0	0	1	0	Good	LFT	2018-09-18	SO-2017.1	0
SO_C_20180718_O_1740.JPG	2018-07-18 14:20:30	58.60402500	-135.93844722	218	Optimal	0	0	1	0	Good	LFT	2018-09-18	SO-2017.1	0
SO_C_20180718_O_1741.JPG	2018-07-18 14:20:31	58.60401389	-135.93925833	217	Optimal	0	0	1	0	Good	LFT	2018-09-18	SO-2017.1	0
SO_C_20180718_O_1742.JPG	2018-07-18 14:20:32	58.60400556	-135.94007500	217	Optimal	0	0	0	0	Good	LFT	2018-09-18	SO-2017.1	0
SO_C_20180718_O_1743.JPG	2018-07-18 14:20:33	58.60399444	-135.94089167	216	Optimal	0	0	0	0	Good	LFT	2018-09-18	SO-2017.1	0
SO_C_20180718_O_1744.JPG	2018-07-18 14:20:34	58.60398611	-135.94171111	216	Optimal	0	0	0	0	Good	LFT	2018-09-18	SO-2017.1	0
SO_C_20180718_O_1745.JPG	2018-07-18 14:20:35	58.60398056	-135.94253333	215	Optimal	0	0	1	0	Good	LFT	2018-09-18	SO-2017.1	0
SO_C_20180718_O_1746.JPG	2018-07-18 14:20:36	58.60397222	-135.94335556	215	Optimal	0	0	0	0	Good	LFT	2018-09-18	SO-2017.1	0
SO_C_20180718_O_1747.JPG	2018-07-18 14:20:37	58.60396944	-135.94418056	214	Optimal	0	0	0	0	Good	LFT	2018-09-18	SO-2017.1	0
SO_C_20180718_O_1748.JPG	2018-07-18 14:20:38	58.60396667	-135.94500556	213	Optimal	0	0	0	0	Good	LFT	2018-09-18	SO-2017.1	0
SO_C_20180718_O_1749.JPG	2018-07-18 14:20:39	58.60396667	-135.94582778	213	Optimal	0	0	0	0	Good	LFT	2018-09-18	SO-2017.1	0
SO_C_20180718_O_1750.JPG	2018-07-18 14:20:40	58.60396944	-135.94665556	213	Optimal	0	0	0	0	Good	LFT	2018-09-18	SO-2017.1	0
SO_C_20180718_O_1751.JPG	2018-07-18 14:20:41	58.60397500	-135.94748056	213	Optimal	0	0	0	0	Good	LFT	2018-09-18	SO-2017.1	0
SO_C_20180718_O_1752.JPG	2018-07-18 14:20:42	58.60398056	-135.94830556	213	Optimal	0	0	0	0	Good	LFT	2018-09-18	SO-2017.1	0
SO_C_20180718_O_1753.JPG	2018-07-18 14:20:43	58.60398611	-135.94913056	213	Optimal	0	0	1	0	Good	LFT	2018-09-18	SO-2017.1	0
SO_C_20180718_O_1754.JPG	2018-07-18 14:20:44	58.60399444	-135.94995278	213	Optimal	0	0	0	0	Good	LFT	2018-09-18	SO-2017.1	0
SO_C_20180718_O_1755.JPG	2018-07-18 14:20:45	58.60400278	-135.95077778	213	Optimal	0	0	0	0	Good	LFT	2018-09-18	SO-2017.1	0
SO_C_20180718_O_1756.JPG	2018-07-18 14:20:46	58.60401111	-135.95160556	213	Optimal	0	0	0	0	Good	LFT	2018-09-18	SO-2017.1	0
SO_C_20180718_O_1757.JPG	2018-07-18 14:20:47	58.60402222	-135.95243333	212	Optimal	0	0	0	0	Good	LFT	2018-09-18	SO-2017.1	0
SO_C_20180718_O_1758.JPG	2018-07-18 14:20:48	58.60403611	-135.95326389	212	Optimal	0	0	0	0	Good	LFT	2018-09-18	SO-2017.1	0
SO_C_20180718_O_1759.JPG	2018-07-18 14:20:49	58.60404722	-135.95409444	212	Optimal	0	0	0	0	Good	LFT	2018-09-18	SO-2017.1	0
SO_C_20180718_O_1760.JPG	2018-07-18 14:20:50	58.60405833	-135.95492778	212	Optimal	0	0	0	0	Good	LFT	2018-09-18	SO-2017.1	0
SO_C_20180718_O_1761.JPG	2018-07-18 14:20:51	58.60406944	-135.95576111	212	Optimal	0	0	1	0	Good	LFT	2018-09-18	SO-2017.1	0
SO_C_20180718_O_1762.JPG	2018-07-18 14:20:52	58.60407778	-135.95659444	212	Optimal	0	0	0	0	Good	LFT	2018-09-18	SO-2017.1	0
SO_C_20180718_O_1763.JPG	2018-07-18 14:20:53	58.60408333	-135.95742778	212	Optimal	0	0	0	0	Good	LFT	2018-09-18	SO-2017.1	0
SO_C_20180718_O_1764.JPG	2018-07-18 14:20:54	58.60408611	-135.95825833	212	Optimal	0	0	0	0	Good	LFT	2018-09-18	SO-2017.1	0
SO_C_20180718_O_1765.JPG	2018-07-18 14:20:55	58.60408611	-135.95908889	212	Optimal	0	0	0	0	Good	LFT	2018-09-18	SO-2017.1	0
SO_C_20180718_O_1766.JPG	2018-07-18 14:20:56	58.60408889	-135.95991389	212	Optimal	0	0	0	0	Good	LFT	2018-09-18	SO-2017.1	0
SO_C_20180718_O_1767.JPG	2018-07-18 14:20:57	58.60409167	-135.96073889	212	Optimal	0	0	0	0	Good	LFT	2018-09-18	SO-2017.1	0
SO_C_20180718_O_1768.JPG	2018-07-18 14:20:58	58.60409444	-135.96155833	212	Optimal	0	0	0	0	Good	LFT	2018-09-18	SO-2017.1	0
SO_C_20180718_O_1769.JPG	2018-07-18 14:20:59	58.60409722	-135.96237500	212	Optimal	0	0	0	0	Good	LFT	2018-09-18	SO-2017.1	0
SO_C_20180718_O_1770.JPG	2018-07-18 14:21:00	58.60409722	-135.96319444	213	Optimal	0	0	0	0	Good	LFT	2018-09-18	SO-2017.1	0
SO_C_20180718_O_1771.JPG	2018-07-18 14:21:01	58.60410000	-135.96400833	213	Optimal	0	0	0	0	Good	LFT	2018-09-18	SO-2017.1	0
SO_C_20180718_O_1772.JPG	2018-07-18 14:21:02	58.60410278	-135.96482500	214	Optimal	0	0	0	0	Good	LFT	2018-09-18	SO-2017.1	0
SO_C_20180718_O_1773.JPG	2018-07-18 14:21:03	58.60410556	-135.96564444	214	Optimal	0	0	1	0	Good	LFT	2018-09-18	SO-2017.1	0
SO_C_20180718_O_1774.JPG	2018-07-18 14:21:04	58.60411111	-135.96646667	215	Optimal	0	0	1	0	Good	LFT	2018-09-18	SO-2017.1	0
SO_C_20180718_O_1775.JPG	2018-07-18 14:21:05	58.60411667	-135.96729444	216	Optimal	0	0	1	0	Good	LFT	2018-09-18	SO-2017.1	0
SO_C_20180718_O_1776.JPG	2018-07-18 14:21:06	58.60411667	-135.96812222	216	Optimal	0	0	1	0	Good	LFT	2018-09-18	SO-2017.1	0
SO_C_20180718_O_1777.JPG	2018-07-18 14:21:07	58.60411667	-135.96895278	216	Optimal	0	0	1	0	Good	LFT	2018-09-18	SO-2017.1	0
SO_C_20180718_O_1778.JPG	2018-07-18 14:21:08	58.60411111	-135.96978889	216	Optimal	0	0	1	0	Good	LFT	2018-09-18	SO-2017.1	0
SO_C_20180718_O_1779.JPG	2018-07-18 14:21:09	58.60409722	-135.97062222	216	Optimal	0	0	1	0	Good	LFT	2018-09-18	SO-2017.1	0
SO_C_20180718_O_1780.JPG	2018-07-18 14:21:10	58.60408333	-135.97145833	216	Optimal	0	0	1	0	Good	LFT	2018-09-18	SO-2017.1	0
SO_C_20180718_O_1781.JPG	2018-07-18 14:21:11	58.60406111	-135.97229167	216	Optimal	0	0	1	0	Good	LFT	2018-09-18	SO-2017.1	0
SO_C_20180718_O_1782.JPG	2018-07-18 14:21:12	58.60403889	-135.97312778	215	Optimal	0	0	1	0	Good	LFT	2018-09-18	SO-2017.1	0
SO_C_20180718_O_1783.JPG	2018-07-18 14:21:13	58.60401111	-135.97395833	215	Optimal	0	0	1	0	Good	LFT	2018-09-18	SO-2017.1	0
SO_C_20180718_O_1784.JPG	2018-07-18 14:21:14	58.60398333	-135.97478889	215	Optimal	0	0	1	0	Good	LFT	2018-09-18	SO-2017.1	0
SO_C_20180718_O_1785.JPG	2018-07-18 14:21:15	58.60395833	-135.97561944	215	Optimal	0	0	1	0	Good	LFT	2018-09-18	SO-2017.1	0
SO_C_20180718_O_1786.JPG	2018-07-18 14:21:16	58.60393056	-135.97645000	215	Optimal	0	0	1	0	Good	LFT	2018-09-18	SO-2017.1	0
SO_C_20180718_O_1787.JPG	2018-07-18 14:21:17	58.60390556	-135.97728056	215	Optimal	0	0	1	0	Good	LFT	2018-09-18	SO-2017.1	0
SO_C_20180718_O_1788.JPG	2018-07-18 14:21:18	58.60388056	-135.97811389	215	Optimal	0	0	1	0	Good	LFT	2018-09-18	SO-2017.1	0
SO_C_20180718_O_1789.JPG	2018-07-18 14:21:19	58.60385833	-135.97894444	216	Optimal	0	0	1	0	Good	LFT	2018-09-18	SO-2017.1	0
SO_C_20180718_O_1790.JPG	2018-07-18 14:21:20	58.60383611	-135.97977500	216	Optimal	0	0	0	0	Good	LFT	2018-09-18	SO-2017.1	0
SO_C_20180718_O_1791.JPG	2018-07-18 14:21:21	58.60381944	-135.98060833	216	Optimal	0	0	0	0	Good	LFT	2018-09-18	SO-2017.1	0
SO_C_20180718_O_1792.JPG	2018-07-18 14:21:22	58.60380278	-135.98143889	216	Optimal	0	0	1	0	Good	LFT	2018-09-18	SO-2017.1	0
SO_C_20180718_O_1793.JPG	2018-07-18 14:21:23	58.60379444	-135.98227222	217	Optimal	0	0	1	0	Good	LFT	2018-09-18	SO-2017.1	0
SO_C_20180718_O_1794.JPG	2018-07-18 14:21:24	58.60378333	-135.98310556	217	Optimal	0	0	1	0	Good	LFT	2018-09-18	SO-2017.1	0
SO_C_20180718_O_1795.JPG	2018-07-18 14:21:25	58.60377222	-135.98393889	217	Optimal	0	0	1	1	Good	LFT	2018-09-18	SO-2017.1	0
SO_C_20180718_O_1796.JPG	2018-07-18 14:21:26	58.60376389	-135.98477222	217	Optimal	0	0	1	1	Good	LFT	2018-09-18	SO-2017.1	0
SO_C_20180718_O_1797.JPG	2018-07-18 14:21:27	58.60375833	-135.98560833	217	Optimal	0	0	0	1	Good	LFT	2018-09-18	SO-2017.1	0
SO_C_20180718_O_1798.JPG	2018-07-18 14:21:28	58.60375556	-135.98644444	217	Optimal	0	0	0	1	Good	LFT	2018-09-18	SO-2017.1	0
SO_C_20180718_O_1799.JPG	2018-07-18 14:21:29	58.60375278	-135.98728611	217	Optimal	0	0	1	1	Good	LFT	2018-09-18	SO-2017.1	0
SO_C_20180718_O_1800.JPG	2018-07-18 14:21:30	58.60375000	-135.98812500	217	Optimal	0	0	1	1	Good	LFT	2018-09-18	SO-2017.1	0
SO_C_20180718_O_1801.JPG	2018-07-18 14:21:31	58.60375000	-135.98896944	217	Optimal	0	0	1	0	Good	LFT	2018-09-18	SO-2017.1	0
SO_C_20180718_O_1802.JPG	2018-07-18 14:21:32	58.60374722	-135.98981389	217	Optimal	0	0	0	0	Good	LFT	2018-09-18	SO-2017.1	0
SO_C_20180718_O_1803.JPG	2018-07-18 14:21:33	58.60374444	-135.99066111	217	Optimal	0	0	0	0	Good	LFT	2018-09-18	SO-2017.1	0
SO_C_20180718_O_1804.JPG	2018-07-18 14:21:34	58.60374167	-135.99150833	217	Optimal	0	0	0	0	Good	LFT	2018-09-18	SO-2017.1	0
SO_C_20180718_O_1805.JPG	2018-07-18 14:21:35	58.60373611	-135.99236111	217	Optimal	0	0	0	0	Good	LFT	2018-09-18	SO-2017.1	0
SO_C_20180718_O_1806.JPG	2018-07-18 14:21:36	58.60373056	-135.99321389	217	Optimal	0	0	0	0	Good	LFT	2018-09-18	SO-2017.1	0
SO_C_20180718_O_1807.JPG	2018-07-18 14:21:37	58.60372500	-135.99406667	216	Optimal	0	0	0	0	Good	LFT	2018-09-18	SO-2017.1	0
SO_C_20180718_O_1808.JPG	2018-07-18 14:21:38	58.60371667	-135.99492222	216	Optimal	0	0	0	0	Good	LFT	2018-09-18	SO-2017.1	0
SO_C_20180718_O_1809.JPG	2018-07-18 14:21:39	58.60370833	-135.99577500	216	Optimal	0	0	1	0	Good	LFT	2018-09-18	SO-2017.1	0
SO_C_20180718_O_1810.JPG	2018-07-18 14:21:40	58.60370000	-135.99662778	215	Optimal	0	0	1	0	Good	LFT	2018-09-18	SO-2017.1	0
SO_C_20180718_O_1811.JPG	2018-07-18 14:21:41	58.60369167	-135.99747778	215	Optimal	1	0	1	0	Good	LFT	2018-09-18	SO-2017.1	0
SO_C_20180718_O_1812.JPG	2018-07-18 14:21:42	58.60368333	-135.99832778	214	Optimal	10	1	1	0	Good	LFT	2018-09-18	SO-2017.1	0
SO_C_20180718_O_1813.JPG	2018-07-18 14:21:43	58.60367778	-135.99916944	214	Optimal	0	0	1	0	Good	LFT	2018-09-18	SO-2017.1	0
SO_C_20180718_O_1814.JPG	2018-07-18 14:21:44	58.60366944	-136.00001111	214	Optimal	0	0	0	0	Good	LFT	2018-09-18	SO-2017.1	0
SO_C_20180718_O_1815.JPG	2018-07-18 14:21:45	58.60366389	-136.00085000	214	Optimal	0	0	0	0	Good	LFT	2018-09-18	SO-2017.1	0
SO_C_20180718_O_1816.JPG	2018-07-18 14:21:46	58.60365833	-136.00168611	214	Optimal	0	0	0	0	Good	LFT	2018-09-18	SO-2017.1	0
SO_C_20180718_O_1817.JPG	2018-07-18 14:21:47	58.60365556	-136.00252500	215	Optimal	0	0	0	0	Good	LFT	2018-09-18	SO-2017.1	0
SO_C_20180718_O_1818.JPG	2018-07-18 14:21:48	58.60365556	-136.00336389	215	Optimal	0	0	0	0	Good	LFT	2018-09-18	SO-2017.1	0
SO_C_20180718_O_1819.JPG	2018-07-18 14:21:49	58.60365556	-136.00420556	216	Optimal	0	0	0	0	Good	LFT	2018-09-18	SO-2017.1	0
SO_C_20180718_O_1820.JPG	2018-07-18 14:21:50	58.60365833	-136.00505278	216	Optimal	0	0	0	0	Good	LFT	2018-09-18	SO-2017.1	0
SO_C_20180718_O_1821.JPG	2018-07-18 14:21:51	58.60366111	-136.00590278	217	Optimal	0	0	0	0	Good	LFT	2018-09-18	SO-2017.1	0
SO_C_20180718_O_1822.JPG	2018-07-18 14:21:52	58.60366389	-136.00675556	217	Optimal	0	0	0	0	Good	LFT	2018-09-18	SO-2017.1	0
SO_C_20180718_O_1823.JPG	2018-07-18 14:21:53	58.60366111	-136.00760556	217	Optimal	0	0	0	0	Good	LFT	2018-09-18	SO-2017.1	0
SO_C_20180718_O_1824.JPG	2018-07-18 14:21:54	58.60365556	-136.00846111	217	Optimal	0	0	0	0	Good	LFT	2018-09-18	SO-2017.1	0
SO_C_20180718_O_1825.JPG	2018-07-18 14:21:55	58.60364722	-136.00931389	217	Optimal	0	0	0	0	Good	LFT	2018-09-18	SO-2017.1	0
SO_C_20180718_O_1826.JPG	2018-07-18 14:21:56	58.60363889	-136.01016667	216	Optimal	0	0	0	0	Good	LFT	2018-09-18	SO-2017.1	0
SO_C_20180718_O_1827.JPG	2018-07-18 14:21:57	58.60363056	-136.01101944	216	Optimal	0	0	0	0	Good	LFT	2018-09-18	SO-2017.1	0
SO_C_20180718_O_1828.JPG	2018-07-18 14:21:58	58.60361944	-136.01187222	216	Optimal	0	0	0	0	Good	LFT	2018-09-18	SO-2017.1	0
SO_C_20180718_O_1829.JPG	2018-07-18 14:21:59	58.60360833	-136.01272222	215	Optimal	0	0	1	0	Good	LFT	2018-09-18	SO-2017.1	0
SO_C_20180718_O_1830.JPG	2018-07-18 14:22:00	58.60359722	-136.01357500	215	Optimal	0	0	0	0	Good	LFT	2018-09-18	SO-2017.1	0
SO_C_20180718_O_1831.JPG	2018-07-18 14:22:01	58.60358889	-136.01443056	215	Optimal	0	0	0	0	Good	LFT	2018-09-18	SO-2017.1	0
SO_C_20180718_O_1832.JPG	2018-07-18 14:22:02	58.60358056	-136.01528333	215	Optimal	0	0	0	0	Good	LFT	2018-09-18	SO-2017.1	0
SO_C_20180718_O_1833.JPG	2018-07-18 14:22:03	58.60357500	-136.01613889	215	Optimal	0	0	0	0	Good	LFT	2018-09-18	SO-2017.1	0
SO_C_20180718_O_1834.JPG	2018-07-18 14:22:04	58.60356944	-136.01699722	215	Optimal	0	0	0	0	Good	LFT	2018-09-18	SO-2017.1	0
SO_C_20180718_O_1835.JPG	2018-07-18 14:22:05	58.60356667	-136.01785556	215	Optimal	0	0	0	0	Good	LFT	2018-09-18	SO-2017.1	0
SO_C_20180718_O_1836.JPG	2018-07-18 14:22:06	58.60356389	-136.01871667	215	Optimal	0	0	0	0	Good	LFT	2018-09-18	SO-2017.1	0
SO_C_20180718_O_1837.JPG	2018-07-18 14:22:07	58.60355833	-136.01958056	215	Optimal	0	0	0	0	Good	LFT	2018-09-18	SO-2017.1	0
SO_C_20180718_O_1838.JPG	2018-07-18 14:22:08	58.60355556	-136.02044167	215	Optimal	0	0	0	0	Good	LFT	2018-09-18	SO-2017.1	0
SO_C_20180718_O_1839.JPG	2018-07-18 14:22:09	58.60355000	-136.02130278	214	Optimal	0	0	0	0	Good	LFT	2018-09-18	SO-2017.1	0
SO_C_20180718_O_1840.JPG	2018-07-18 14:22:10	58.60354444	-136.02216389	214	Optimal	0	0	0	0	Good	LFT	2018-09-18	SO-2017.1	0
SO_C_20180718_O_1841.JPG	2018-07-18 14:22:11	58.60353611	-136.02301944	213	Optimal	0	0	0	0	Good	LFT	2018-09-18	SO-2017.1	0
SO_C_20180718_O_1842.JPG	2018-07-18 14:22:12	58.60353056	-136.02387500	213	Optimal	0	0	0	0	Good	LFT	2018-09-18	SO-2017.1	0
SO_C_20180718_O_1843.JPG	2018-07-18 14:22:13	58.60352222	-136.02472500	213	Optimal	0	0	0	0	Good	LFT	2018-09-18	SO-2017.1	0
SO_C_20180718_O_1844.JPG	2018-07-18 14:22:14	58.60351667	-136.02557778	213	Optimal	0	0	0	0	Good	LFT	2018-09-18	SO-2017.1	0
SO_C_20180718_O_1845.JPG	2018-07-18 14:22:15	58.60351111	-136.02642778	213	Optimal	0	0	0	0	Good	LFT	2018-09-18	SO-2017.1	0
SO_C_20180718_O_1846.JPG	2018-07-18 14:22:16	58.60350833	-136.02727778	213	Optimal	0	0	0	0	Good	LFT	2018-09-18	SO-2017.1	0
SO_C_20180718_O_1847.JPG	2018-07-18 14:22:17	58.60350556	-136.02813056	213	Optimal	0	0	0	0	Good	LFT	2018-09-18	SO-2017.1	0
SO_C_20180718_O_1848.JPG	2018-07-18 14:22:18	58.60350278	-136.02898333	213	Optimal	0	0	0	0	Good	LFT	2018-09-18	SO-2017.1	0
SO_C_20180718_O_1849.JPG	2018-07-18 14:22:19	58.60350000	-136.02983889	213	Optimal	0	0	0	0	Good	LFT	2018-09-18	SO-2017.1	0
SO_C_20180718_O_1850.JPG	2018-07-18 14:22:20	58.60349444	-136.03069722	213	Optimal	0	0	0	0	Good	LFT	2018-09-18	SO-2017.1	0
SO_C_20180718_O_1851.JPG	2018-07-18 14:22:21	58.60348889	-136.03155556	213	Optimal	0	0	0	0	Good	LFT	2018-09-18	SO-2017.1	0
SO_C_20180718_O_1852.JPG	2018-07-18 14:22:22	58.60348056	-136.03241389	213	Optimal	0	0	0	0	Good	LFT	2018-09-18	SO-2017.1	0
SO_C_20180718_O_1853.JPG	2018-07-18 14:22:23	58.60346667	-136.03327778	213	Optimal	0	0	0	0	Good	LFT	2018-09-18	SO-2017.1	0
SO_C_20180718_O_1854.JPG	2018-07-18 14:22:24	58.60345000	-136.03413889	213	Optimal	0	0	0	0	Good	LFT	2018-09-18	SO-2017.1	0
SO_C_20180718_O_1855.JPG	2018-07-18 14:22:25	58.60343056	-136.03500278	212	Optimal	0	0	0	0	Good	LFT	2018-09-18	SO-2017.1	0
SO_C_20180718_O_1856.JPG	2018-07-18 14:22:26	58.60340833	-136.03586111	211	Optimal	0	0	0	0	Good	LFT	2018-09-18	SO-2017.1	0
SO_C_20180718_O_1857.JPG	2018-07-18 14:22:27	58.60339167	-136.03672222	211	Optimal	0	0	0	0	Good	LFT	2018-09-18	SO-2017.1	0
SO_C_20180718_O_1858.JPG	2018-07-18 14:22:28	58.60337500	-136.03757778	210	Optimal	0	0	0	0	Good	LFT	2018-09-18	SO-2017.1	0
SO_C_20180718_O_1859.JPG	2018-07-18 14:22:29	58.60336111	-136.03842778	210	Optimal	0	0	0	0	Good	LFT	2018-09-18	SO-2017.1	0
SO_C_20180718_O_1860.JPG	2018-07-18 14:22:30	58.60335000	-136.03927222	210	Optimal	0	0	0	0	Good	LFT	2018-09-18	SO-2017.1	0
SO_C_20180718_O_1861.JPG	2018-07-18 14:22:31	58.60334167	-136.04011667	210	Optimal	0	0	0	0	Good	LFT	2018-09-18	SO-2017.1	0
SO_C_20180718_O_1862.JPG	2018-07-18 14:22:32	58.60333889	-136.04095556	210	Optimal	0	0	0	0	Good	LFT	2018-09-18	SO-2017.1	0
SO_C_20180718_O_1863.JPG	2018-07-18 14:22:33	58.60333611	-136.04178611	210	Optimal	0	0	0	0	Good	LFT	2018-09-18	SO-2017.1	0
SO_C_20180718_O_1864.JPG	2018-07-18 14:22:34	58.60333889	-136.04261944	211	Optimal	0	0	0	0	Good	LFT	2018-09-18	SO-2017.1	0
SO_C_20180718_O_1865.JPG	2018-07-18 14:22:35	58.60334167	-136.04345000	211	Optimal	0	0	0	0	Good	LFT	2018-09-18	SO-2017.1	0
SO_C_20180718_O_1866.JPG	2018-07-18 14:22:36	58.60335000	-136.04428056	212	Optimal	0	0	0	0	Good	LFT	2018-09-18	SO-2017.1	0
SO_C_20180718_O_1867.JPG	2018-07-18 14:22:37	58.60335833	-136.04511389	213	Optimal	0	0	0	0	Good	LFT	2018-09-18	SO-2017.1	0
SO_C_20180718_O_1868.JPG	2018-07-18 14:22:38	58.60337222	-136.04594722	213	Optimal	0	0	0	0	Good	LFT	2018-09-18	SO-2017.1	0
SO_C_20180718_O_1869.JPG	2018-07-18 14:22:39	58.60338333	-136.04678611	213	Optimal	0	0	0	0	Good	LFT	2018-09-18	SO-2017.1	0
SO_C_20180718_O_1870.JPG	2018-07-18 14:22:40	58.60339444	-136.04762222	213	Optimal	0	0	0	0	Good	LFT	2018-09-18	SO-2017.1	0
SO_C_20180718_O_1871.JPG	2018-07-18 14:22:41	58.60340556	-136.04845833	214	Optimal	0	0	0	0	Good	LFT	2018-09-18	SO-2017.1	0
SO_C_20180718_O_1872.JPG	2018-07-18 14:22:42	58.60341111	-136.04929444	213	Optimal	0	0	0	0	Good	LFT	2018-09-18	SO-2017.1	0
SO_C_20180718_O_1873.JPG	2018-07-18 14:22:43	58.60341389	-136.05012778	213	Optimal	0	0	0	0	Good	LFT	2018-09-18	SO-2017.1	0
SO_C_20180718_O_1874.JPG	2018-07-18 14:22:44	58.60341111	-136.05095833	213	Optimal	0	0	0	0	Good	LFT	2018-09-18	SO-2017.1	0
SO_C_20180718_O_1875.JPG	2018-07-18 14:22:45	58.60340278	-136.05178611	213	Optimal	0	0	0	0	Good	LFT	2018-09-18	SO-2017.1	0
SO_C_20180718_O_1876.JPG	2018-07-18 14:22:46	58.60339167	-136.05261111	213	Optimal	0	0	0	0	Good	LFT	2018-09-18	SO-2017.1	0
SO_C_20180718_O_1877.JPG	2018-07-18 14:22:47	58.60338056	-136.05343333	213	Optimal	0	0	0	0	Good	LFT	2018-09-18	SO-2017.1	0
SO_C_20180718_O_1878.JPG	2018-07-18 14:22:48	58.60336944	-136.05425278	213	Optimal	0	0	0	0	Good	LFT	2018-09-18	SO-2017.1	0
SO_C_20180718_O_1879.JPG	2018-07-18 14:22:49	58.60335556	-136.05506944	213	Optimal	0	0	0	0	Good	LFT	2018-09-18	SO-2017.1	0
SO_C_20180718_O_1880.JPG	2018-07-18 14:22:50	58.60334167	-136.05588889	214	Optimal	0	0	0	0	Good	LFT	2018-09-18	SO-2017.1	0
SO_C_20180718_O_1881.JPG	2018-07-18 14:22:51	58.60332778	-136.05671111	215	Optimal	0	0	0	0	Good	LFT	2018-09-18	SO-2017.1	0
SO_C_20180718_O_1882.JPG	2018-07-18 14:22:52	58.60331389	-136.05753889	215	Optimal	0	0	0	0	Good	LFT	2018-09-18	SO-2017.1	0
SO_C_20180718_O_1883.JPG	2018-07-18 14:22:53	58.60330278	-136.05836667	216	Optimal	0	0	0	0	Good	LFT	2018-09-18	SO-2017.1	0
SO_C_20180718_O_1884.JPG	2018-07-18 14:22:54	58.60329167	-136.05920000	216	Optimal	0	0	0	0	Good	LFT	2018-09-18	SO-2017.1	0
SO_C_20180718_O_1885.JPG	2018-07-18 14:22:55	58.60328056	-136.06003333	216	Optimal	0	0	0	0	Good	LFT	2018-09-18	SO-2017.1	0
SO_C_20180718_O_1886.JPG	2018-07-18 14:22:56	58.60326667	-136.06087222	216	Optimal	0	0	0	0	Good	LFT	2018-09-18	SO-2017.1	0
SO_C_20180718_O_1887.JPG	2018-07-18 14:22:57	58.60325278	-136.06170833	216	Optimal	0	0	0	0	Good	LFT	2018-09-18	SO-2017.1	0
SO_C_20180718_O_1888.JPG	2018-07-18 14:22:58	58.60323889	-136.06254722	215	Optimal	0	0	0	0	Good	LFT	2018-09-18	SO-2017.1	0
SO_C_20180718_O_1889.JPG	2018-07-18 14:22:59	58.60322500	-136.06338333	214	Optimal	0	0	0	0	Good	LFT	2018-09-18	SO-2017.1	0
SO_C_20180718_O_1890.JPG	2018-07-18 14:23:00	58.60320833	-136.06421389	213	Optimal	0	0	0	0	Good	LFT	2018-09-18	SO-2017.1	0
SO_C_20180718_O_1891.JPG	2018-07-18 14:23:01	58.60319444	-136.06504167	213	Optimal	0	0	0	0	Good	LFT	2018-09-18	SO-2017.1	0
SO_C_20180718_O_1892.JPG	2018-07-18 14:23:02	58.60318056	-136.06586389	212	Optimal	0	0	0	0	Good	LFT	2018-09-18	SO-2017.1	0
SO_C_20180718_O_1893.JPG	2018-07-18 14:23:03	58.60316944	-136.06668056	212	Optimal	0	0	0	0	Good	LFT	2018-09-18	SO-2017.1	0
SO_C_20180718_O_1894.JPG	2018-07-18 14:23:04	58.60316111	-136.06749167	212	Optimal	0	0	0	0	Good	LFT	2018-09-18	SO-2017.1	0
SO_C_20180718_O_1895.JPG	2018-07-18 14:23:05	58.60315278	-136.06830278	212	Optimal	0	0	0	0	Good	LFT	2018-09-18	SO-2017.1	0
SO_C_20180718_O_1896.JPG	2018-07-18 14:23:06	58.60314722	-136.06911111	212	Optimal	0	0	0	0	Good	LFT	2018-09-18	SO-2017.1	0
SO_C_20180718_O_1897.JPG	2018-07-18 14:23:07	58.60313889	-136.06991944	213	Optimal	0	0	0	0	Good	LFT	2018-09-18	SO-2017.1	0
SO_C_20180718_O_1898.JPG	2018-07-18 14:23:08	58.60313333	-136.07072778	213	Optimal	0	0	0	0	Good	LFT	2018-09-18	SO-2017.1	0
SO_C_20180718_O_1899.JPG	2018-07-18 14:23:09	58.60312778	-136.07153333	214	Optimal	0	0	0	0	Good	LFT	2018-09-18	SO-2017.1	0
SO_C_20180718_O_1900.JPG	2018-07-18 14:23:10	58.60312500	-136.07234167	215	Optimal	0	0	0	0	Good	LFT	2018-09-18	SO-2017.1	0
SO_C_20180718_O_1901.JPG	2018-07-18 14:23:11	58.60312500	-136.07315000	216	Optimal	0	0	0	0	Good	LFT	2018-09-18	SO-2017.1	0
SO_C_20180718_O_1902.JPG	2018-07-18 14:23:12	58.60312500	-136.07396111	216	Optimal	0	0	0	0	Good	LFT	2018-09-18	SO-2017.1	0
SO_C_20180718_O_1903.JPG	2018-07-18 14:23:13	58.60312778	-136.07477778	217	Optimal	0	0	0	0	Good	LFT	2018-09-18	SO-2017.1	0
SO_C_20180718_O_1904.JPG	2018-07-18 14:23:14	58.60313056	-136.07559444	217	Optimal	0	0	0	0	Good	LFT	2018-09-18	SO-2017.1	0
SO_C_20180718_O_1905.JPG	2018-07-18 14:23:15	58.60313611	-136.07641667	217	Optimal	0	0	0	0	Good	LFT	2018-09-18	SO-2017.1	0
SO_C_20180718_O_1906.JPG	2018-07-18 14:23:16	58.60314167	-136.07723611	218	Optimal	0	0	0	0	Good	LFT	2018-09-18	SO-2017.1	0
SO_C_20180718_O_1907.JPG	2018-07-18 14:23:17	58.60314444	-136.07806111	217	Optimal	0	0	0	0	Good	LFT	2018-09-18	SO-2017.1	0
SO_C_20180718_O_1908.JPG	2018-07-18 14:23:18	58.60314444	-136.07888611	217	Optimal	0	0	0	0	Good	LFT	2018-09-18	SO-2017.1	0
SO_C_20180718_O_1909.JPG	2018-07-18 14:23:19	58.60313889	-136.07971111	217	Optimal	0	0	0	0	Good	LFT	2018-09-18	SO-2017.1	0
SO_C_20180718_O_1910.JPG	2018-07-18 14:23:20	58.60313056	-136.08053611	216	Optimal	0	0	0	0	Good	LFT	2018-09-18	SO-2017.1	0
SO_C_20180718_O_1911.JPG	2018-07-18 14:23:21	58.60311667	-136.08135556	216	Optimal	0	0	0	0	Good	LFT	2018-09-18	SO-2017.1	0
SO_C_20180718_O_1912.JPG	2018-07-18 14:23:22	58.60310278	-136.08217778	215	Optimal	0	0	0	0	Good	LFT	2018-09-18	SO-2017.1	0
SO_C_20180718_O_1913.JPG	2018-07-18 14:23:23	58.60308889	-136.08300000	215	Optimal	0	0	0	0	Good	LFT	2018-09-18	SO-2017.1	0
SO_C_20180718_O_1914.JPG	2018-07-18 14:23:24	58.60307778	-136.08381944	215	Optimal	0	0	0	0	Good	LFT	2018-09-18	SO-2017.1	0
SO_C_20180718_O_1915.JPG	2018-07-18 14:23:25	58.60306944	-136.08463611	215	Optimal	0	0	0	0	Good	LFT	2018-09-18	SO-2017.1	0
SO_C_20180718_O_1916.JPG	2018-07-18 14:23:26	58.60306389	-136.08545000	215	Optimal	0	0	0	0	Good	LFT	2018-09-18	SO-2017.1	0
SO_C_20180718_O_1917.JPG	2018-07-18 14:23:27	58.60305833	-136.08626667	215	Optimal	0	0	0	0	Good	LFT	2018-09-18	SO-2017.1	0
SO_C_20180718_O_1918.JPG	2018-07-18 14:23:28	58.60305556	-136.08708333	215	Optimal	0	0	0	0	Good	LFT	2018-09-18	SO-2017.1	0
SO_C_20180718_O_1919.JPG	2018-07-18 14:23:29	58.60305556	-136.08790278	215	Optimal	0	0	0	0	Good	LFT	2018-09-18	SO-2017.1	0
SO_C_20180718_O_1920.JPG	2018-07-18 14:23:30	58.60305556	-136.08872222	215	Optimal	0	0	0	0	Good	LFT	2018-09-18	SO-2017.1	0
SO_C_20180718_O_1921.JPG	2018-07-18 14:23:31	58.60305833	-136.08954444	215	Optimal	0	0	0	0	Good	LFT	2018-09-18	SO-2017.1	0
SO_C_20180718_O_1922.JPG	2018-07-18 14:23:32	58.60306111	-136.09036389	214	Optimal	0	0	0	0	Good	LFT	2018-09-18	SO-2017.1	0
SO_C_20180718_O_1923.JPG	2018-07-18 14:23:33	58.60306389	-136.09118611	214	Optimal	0	0	0	0	Good	LFT	2018-09-18	SO-2017.1	0
SO_C_20180718_O_1924.JPG	2018-07-18 14:23:34	58.60306111	-136.09200833	213	Optimal	0	0	0	0	Good	LFT	2018-09-18	SO-2017.1	0
SO_C_20180718_O_1925.JPG	2018-07-18 14:23:35	58.60306111	-136.09282778	213	Optimal	0	0	0	0	Good	LFT	2018-09-18	SO-2017.1	0
SO_C_20180718_O_1926.JPG	2018-07-18 14:23:36	58.60305556	-136.09364722	212	Optimal	0	0	0	0	Good	LFT	2018-09-18	SO-2017.1	0
SO_C_20180718_O_1927.JPG	2018-07-18 14:23:37	58.60304444	-136.09446389	212	Optimal	0	0	1	0	Good	LFT	2018-09-18	SO-2017.1	0
SO_C_20180718_O_1928.JPG	2018-07-18 14:23:38	58.60303333	-136.09528056	212	Optimal	0	0	0	0	Good	LFT	2018-09-18	SO-2017.1	0
SO_C_20180718_O_1929.JPG	2018-07-18 14:23:39	58.60301944	-136.09610000	211	Optimal	0	0	0	0	Good	LFT	2018-09-18	SO-2017.1	0
SO_C_20180718_O_1930.JPG	2018-07-18 14:23:40	58.60300556	-136.09691944	211	Optimal	0	0	0	0	Good	LFT	2018-09-18	SO-2017.1	0
SO_C_20180718_O_1931.JPG	2018-07-18 14:23:41	58.60299167	-136.09773889	211	Optimal	0	0	0	0	Good	LFT	2018-09-18	SO-2017.1	0
SO_C_20180718_O_1932.JPG	2018-07-18 14:23:42	58.60297778	-136.09856111	211	Optimal	0	0	0	0	Good	LFT	2018-09-18	SO-2017.1	0
SO_C_20180718_O_1933.JPG	2018-07-18 14:23:43	58.60296389	-136.09938333	211	Optimal	0	0	0	0	Good	LFT	2018-09-18	SO-2017.1	0
SO_C_20180718_O_1934.JPG	2018-07-18 14:23:44	58.60295278	-136.10020833	211	Optimal	0	0	0	0	Good	LFT	2018-09-18	SO-2017.1	0
SO_C_20180718_O_1935.JPG	2018-07-18 14:23:45	58.60294167	-136.10103611	211	Optimal	0	0	0	0	Good	LFT	2018-09-18	SO-2017.1	0
SO_C_20180718_O_1936.JPG	2018-07-18 14:23:46	58.60293333	-136.10186389	210	Optimal	0	0	0	0	Good	LFT	2018-09-18	SO-2017.1	0
SO_C_20180718_O_1937.JPG	2018-07-18 14:23:47	58.60292500	-136.10269444	210	Optimal	0	0	0	0	Good	LFT	2018-09-18	SO-2017.1	0
SO_C_20180718_O_1938.JPG	2018-07-18 14:23:48	58.60291389	-136.10352778	210	Optimal	0	0	1	0	Good	LFT	2018-09-18	SO-2017.1	0
SO_C_20180718_O_1939.JPG	2018-07-18 14:23:49	58.60290556	-136.10436389	209	Optimal	0	0	0	0	Good	LFT	2018-09-18	SO-2017.1	0
SO_C_20180718_O_1940.JPG	2018-07-18 14:23:50	58.60289722	-136.10520000	209	Optimal	0	0	1	0	Good	LFT	2018-09-18	SO-2017.1	0
SO_C_20180718_O_1941.JPG	2018-07-18 14:23:51	58.60288889	-136.10603333	208	Optimal	0	0	1	1	Good	LFT	2018-09-18	SO-2017.1	0
SO_C_20180718_O_1942.JPG	2018-07-18 14:23:52	58.60288333	-136.10686944	208	Optimal	0	0	1	1	Good	LFT	2018-09-18	SO-2017.1	0
SO_C_20180718_O_1943.JPG	2018-07-18 14:23:53	58.60287778	-136.10770556	207	Optimal	0	0	1	1	Good	LFT	2018-09-18	SO-2017.1	0
SO_C_20180718_O_1944.JPG	2018-07-18 14:23:54	58.60287778	-136.10854444	207	Optimal	0	0	0	1	Good	LFT	2018-09-18	SO-2017.1	0
SO_C_20180718_O_1945.JPG	2018-07-18 14:23:55	58.60288611	-136.10937778	206	Optimal	0	0	0	1	Good	LFT	2018-09-18	SO-2017.1	0
SO_C_20180718_O_1946.JPG	2018-07-18 14:23:56	58.60290833	-136.11020833	206	Optimal	0	0	0	1	Good	LFT	2018-09-18	SO-2017.1	0
SO_C_20180718_O_1947.JPG	2018-07-18 14:23:57	58.60294722	-136.11103056	205	Optimal	0	0	0	1	Good	LFT	2018-09-18	SO-2017.1	0
SO_C_20180718_O_1948.JPG	2018-07-18 14:23:58	58.60300000	-136.11184722	205	Optimal	0	0	0	1	Good	LFT	2018-09-18	SO-2017.1	0
SO_C_20180718_O_1949.JPG	2018-07-18 14:23:59	58.60306944	-136.11265833	205	Optimal	0	0	0	1	Good	LFT	2018-09-18	SO-2017.1	0
SO_C_20180718_O_1950.JPG	2018-07-18 14:24:50	58.60293611	-136.15196111	200	Optimal	0	0	1	1	Good	LFT	2018-09-18	SO-2017.1	0
SO_C_20180718_O_1951.JPG	2018-07-18 14:24:51	58.60273611	-136.15273333	199	Optimal	0	0	0	0	Good	LFT	2018-09-18	SO-2017.1	0
SO_C_20180718_O_1952.JPG	2018-07-18 14:24:52	58.60256389	-136.15353056	199	Optimal	0	0	0	0	Good	LFT	2018-09-18	SO-2017.1	0
SO_C_20180718_O_1953.JPG	2018-07-18 14:24:53	58.60242222	-136.15434722	198	Optimal	0	0	0	0	Good	LFT	2018-09-18	SO-2017.1	0
SO_C_20180718_O_1954.JPG	2018-07-18 14:24:54	58.60231944	-136.15518056	198	Optimal	0	0	0	0	Good	LFT	2018-09-18	SO-2017.1	0
SO_C_20180718_O_1955.JPG	2018-07-18 14:24:55	58.60225000	-136.15601944	197	Optimal	0	0	0	0	Good	LFT	2018-09-18	SO-2017.1	0
SO_C_20180718_O_1956.JPG	2018-07-18 14:24:56	58.60220556	-136.15685556	197	Optimal	0	0	0	0	Good	LFT	2018-09-18	SO-2017.1	0
SO_C_20180718_O_1957.JPG	2018-07-18 14:24:57	58.60217500	-136.15768333	197	Optimal	0	0	0	0	Good	LFT	2018-09-18	SO-2017.1	0
SO_C_20180718_O_1958.JPG	2018-07-18 14:24:58	58.60216111	-136.15850833	198	Optimal	0	0	0	0	Good	LFT	2018-09-18	SO-2017.1	0
SO_C_20180718_O_1959.JPG	2018-07-18 14:24:59	58.60215278	-136.15932778	198	Optimal	0	0	0	0	Good	LFT	2018-09-18	SO-2017.1	0
SO_C_20180718_O_1960.JPG	2018-07-18 14:25:00	58.60214722	-136.16014722	200	Optimal	0	0	0	0	Good	LFT	2018-09-18	SO-2017.1	0
SO_C_20180718_O_1961.JPG	2018-07-18 14:25:01	58.60214167	-136.16096111	201	Optimal	0	0	0	0	Good	LFT	2018-09-18	SO-2017.1	0
SO_C_20180718_O_1962.JPG	2018-07-18 14:25:02	58.60213333	-136.16177500	203	Optimal	0	0	0	0	Good	LFT	2018-09-18	SO-2017.1	0
SO_C_20180718_O_1963.JPG	2018-07-18 14:25:03	58.60212500	-136.16258889	204	Optimal	0	0	0	0	Good	LFT	2018-09-18	SO-2017.1	0
SO_C_20180718_O_1964.JPG	2018-07-18 14:25:04	58.60211667	-136.16340278	205	Optimal	0	0	0	0	Good	LFT	2018-09-18	SO-2017.1	0
SO_C_20180718_O_1965.JPG	2018-07-18 14:25:05	58.60211389	-136.16422222	206	Optimal	0	0	0	0	Good	LFT	2018-09-18	SO-2017.1	0
SO_C_20180718_O_1966.JPG	2018-07-18 14:25:06	58.60211389	-136.16504167	207	Optimal	0	0	0	0	Good	LFT	2018-09-18	SO-2017.1	0
SO_C_20180718_O_1967.JPG	2018-07-18 14:25:07	58.60211389	-136.16586389	208	Optimal	0	0	0	0	Good	LFT	2018-09-18	SO-2017.1	0
SO_C_20180718_O_1968.JPG	2018-07-18 14:25:08	58.60211111	-136.16668611	209	Optimal	0	0	0	0	Good	LFT	2018-09-18	SO-2017.1	0
SO_C_20180718_O_1969.JPG	2018-07-18 14:25:09	58.60211389	-136.16750833	209	Optimal	0	0	0	0	Good	LFT	2018-09-18	SO-2017.1	0
SO_C_20180718_O_1970.JPG	2018-07-18 14:25:10	58.60211667	-136.16833056	210	Optimal	0	0	0	0	Good	LFT	2018-09-18	SO-2017.1	0
SO_C_20180718_O_1971.JPG	2018-07-18 14:25:11	58.60212222	-136.16915000	210	Optimal	0	0	0	0	Good	LFT	2018-09-18	SO-2017.1	0
SO_C_20180718_O_1972.JPG	2018-07-18 14:25:12	58.60212778	-136.16996667	210	Optimal	0	0	0	0	Good	LFT	2018-09-18	SO-2017.1	0
SO_C_20180718_O_1973.JPG	2018-07-18 14:25:13	58.60213611	-136.17078611	211	Optimal	0	0	0	0	Good	LFT	2018-09-18	SO-2017.1	0
SO_C_20180718_O_1974.JPG	2018-07-18 14:25:14	58.60214444	-136.17160278	211	Optimal	0	0	0	0	Good	LFT	2018-09-18	SO-2017.1	0
SO_C_20180718_O_1975.JPG	2018-07-18 14:25:15	58.60215000	-136.17241944	211	Optimal	0	0	0	0	Good	LFT	2018-09-18	SO-2017.1	0
SO_C_20180718_O_1976.JPG	2018-07-18 14:25:16	58.60215278	-136.17323611	211	Optimal	0	0	0	0	Good	LFT	2018-09-18	SO-2017.1	0
SO_C_20180718_O_1977.JPG	2018-07-18 14:25:17	58.60215833	-136.17405278	211	Optimal	0	0	0	0	Good	LFT	2018-09-18	SO-2017.1	0
SO_C_20180718_O_1978.JPG	2018-07-18 14:25:18	58.60216667	-136.17487222	212	Optimal	0	0	0	0	Good	LFT	2018-09-18	SO-2017.1	0
SO_C_20180718_O_1979.JPG	2018-07-18 14:25:19	58.60217222	-136.17569444	212	Optimal	0	0	0	0	Good	LFT	2018-09-18	SO-2017.1	0
SO_C_20180718_O_1980.JPG	2018-07-18 14:25:20	58.60217778	-136.17651944	212	Optimal	0	0	0	0	Good	LFT	2018-09-18	SO-2017.1	0
SO_C_20180718_O_1981.JPG	2018-07-18 14:25:21	58.60218056	-136.17734444	212	Optimal	0	0	0	0	Good	LFT	2018-09-18	SO-2017.1	0
SO_C_20180718_O_1982.JPG	2018-07-18 14:25:22	58.60218333	-136.17816944	212	Optimal	0	0	0	0	Good	LFT	2018-09-18	SO-2017.1	0
SO_C_20180718_O_1983.JPG	2018-07-18 14:25:23	58.60218056	-136.17899722	212	Optimal	0	0	0	0	Good	LFT	2018-09-18	SO-2017.1	0
SO_C_20180718_O_1984.JPG	2018-07-18 14:25:24	58.60217778	-136.17982222	212	Optimal	0	0	0	0	Good	LFT	2018-09-18	SO-2017.1	0
SO_C_20180718_O_1985.JPG	2018-07-18 14:25:25	58.60216944	-136.18064444	212	Optimal	0	0	0	0	Good	LFT	2018-09-18	SO-2017.1	0
SO_C_20180718_O_1986.JPG	2018-07-18 14:25:26	58.60215833	-136.18146667	211	Optimal	0	0	0	0	Good	LFT	2018-09-18	SO-2017.1	0
SO_C_20180718_O_1987.JPG	2018-07-18 14:25:27	58.60214444	-136.18228889	211	Optimal	0	0	0	0	Good	LFT	2018-09-18	SO-2017.1	0
SO_C_20180718_O_1988.JPG	2018-07-18 14:25:28	58.60212778	-136.18310833	211	Optimal	0	0	0	0	Good	LFT	2018-09-18	SO-2017.1	0
SO_C_20180718_O_1989.JPG	2018-07-18 14:25:29	58.60210833	-136.18392500	211	Optimal	0	0	0	0	Good	LFT	2018-09-18	SO-2017.1	0
SO_C_20180718_O_1990.JPG	2018-07-18 14:25:30	58.60209167	-136.18474444	210	Optimal	0	0	0	0	Good	LFT	2018-09-18	SO-2017.1	0
SO_C_20180718_O_1991.JPG	2018-07-18 14:25:31	58.60207500	-136.18556111	210	Optimal	0	0	0	0	Good	LFT	2018-09-18	SO-2017.1	0
SO_C_20180718_O_1992.JPG	2018-07-18 14:25:32	58.60206111	-136.18637500	210	Optimal	0	0	0	0	Good	LFT	2018-09-18	SO-2017.1	0
SO_C_20180718_O_1993.JPG	2018-07-18 14:25:33	58.60204722	-136.18718611	209	Optimal	0	0	0	0	Good	LFT	2018-09-18	SO-2017.1	0
SO_C_20180718_O_1994.JPG	2018-07-18 14:25:34	58.60203611	-136.18799722	209	Optimal	0	0	0	0	Good	LFT	2018-09-18	SO-2017.1	0
SO_C_20180718_O_1995.JPG	2018-07-18 14:25:35	58.60202222	-136.18880833	209	Optimal	0	0	0	0	Good	LFT	2018-09-18	SO-2017.1	0
SO_C_20180718_O_1996.JPG	2018-07-18 14:25:36	58.60201111	-136.18961944	209	Optimal	0	0	0	0	Good	LFT	2018-09-18	SO-2017.1	0
SO_C_20180718_O_1997.JPG	2018-07-18 14:25:37	58.60199722	-136.19043333	209	Optimal	0	0	1	0	Good	LFT	2018-09-18	SO-2017.1	0
SO_C_20180718_O_1998.JPG	2018-07-18 14:25:38	58.60198889	-136.19124444	209	Optimal	0	0	1	0	Good	LFT	2018-09-18	SO-2017.1	0
SO_C_20180718_O_1999.JPG	2018-07-18 14:25:39	58.60197778	-136.19205556	209	Optimal	0	0	0	0	Good	LFT	2018-09-18	SO-2017.1	0
SO_C_20180718_O_2000.JPG	2018-07-18 14:25:40	58.60196944	-136.19286389	209	Optimal	0	0	0	0	Good	LFT	2018-09-18	SO-2017.1	0
SO_C_20180718_O_2001.JPG	2018-07-18 14:25:41	58.60196111	-136.19366944	209	Optimal	0	0	0	0	Good	LFT	2018-09-18	SO-2017.1	0
SO_C_20180718_O_2002.JPG	2018-07-18 14:25:42	58.60195556	-136.19447500	209	Optimal	0	0	1	0	Good	LFT	2018-09-18	SO-2017.1	0
SO_C_20180718_O_2003.JPG	2018-07-18 14:25:43	58.60195278	-136.19528056	209	Optimal	0	0	1	1	Good	LFT	2018-09-18	SO-2017.1	0
SO_C_20180718_O_2004.JPG	2018-07-18 14:25:44	58.60195278	-136.19608333	209	Optimal	0	0	0	1	Good	LFT	2018-09-18	SO-2017.1	0
SO_C_20180718_O_2005.JPG	2018-07-18 14:25:45	58.60195556	-136.19688611	210	Optimal	0	0	0	1	Good	LFT	2018-09-18	SO-2017.1	0
SO_C_20180718_O_2006.JPG	2018-07-18 14:25:46	58.60196111	-136.19768611	210	Optimal	0	0	0	1	Good	LFT	2018-09-18	SO-2017.1	0
SO_C_20180718_O_2007.JPG	2018-07-18 14:25:47	58.60196389	-136.19848889	211	Optimal	0	0	0	1	Good	LFT	2018-09-18	SO-2017.1	0
SO_C_20180718_O_2008.JPG	2018-07-18 14:25:48	58.60196667	-136.19929167	212	Optimal	0	0	0	1	Good	LFT	2018-09-18	SO-2017.1	0
SO_C_20180718_O_2009.JPG	2018-07-18 14:25:49	58.60196944	-136.20009444	212	Optimal	0	0	0	1	Good	LFT	2018-09-18	SO-2017.1	0
SO_C_20180718_O_2010.JPG	2018-07-18 14:25:50	58.60197222	-136.20090000	213	Optimal	0	0	0	1	Good	LFT	2018-09-18	SO-2017.1	0
SO_C_20180718_O_2011.JPG	2018-07-18 14:25:51	58.60197222	-136.20170833	213	Optimal	0	0	0	1	Good	LFT	2018-09-18	SO-2017.1	0
SO_C_20180718_O_2012.JPG	2018-07-18 14:25:52	58.60197222	-136.20251944	213	Optimal	0	0	0	1	Good	LFT	2018-09-18	SO-2017.1	0
SO_C_20180718_O_2013.JPG	2018-07-18 14:25:53	58.60197222	-136.20333611	213	Optimal	0	0	0	1	Good	LFT	2018-09-18	SO-2017.1	0
SO_C_20180718_O_2014.JPG	2018-07-18 14:25:54	58.60196389	-136.20415556	214	Optimal	0	0	0	1	Good	LFT	2018-09-18	SO-2017.1	0
SO_C_20180718_O_2015.JPG	2018-07-18 14:25:55	58.60195833	-136.20497778	214	Optimal	0	0	0	1	Good	LFT	2018-09-18	SO-2017.1	0
SO_C_20180718_O_2016.JPG	2018-07-18 14:25:56	58.60194722	-136.20580278	214	Optimal	0	0	0	1	Good	LFT	2018-09-18	SO-2017.1	0
SO_C_20180718_O_2017.JPG	2018-07-18 14:25:57	58.60193611	-136.20663056	213	Optimal	0	0	0	1	Good	LFT	2018-09-18	SO-2017.1	0
SO_C_20180718_O_2018.JPG	2018-07-18 14:25:58	58.60192222	-136.20745833	213	Optimal	0	0	0	1	Good	LFT	2018-09-18	SO-2017.1	0
SO_C_20180718_O_2019.JPG	2018-07-18 14:25:59	58.60190556	-136.20829167	212	Optimal	0	0	0	1	Good	LFT	2018-09-18	SO-2017.1	0
SO_C_20180718_O_2020.JPG	2018-07-18 14:26:00	58.60189167	-136.20912500	212	Optimal	0	0	0	1	Good	LFT	2018-09-18	SO-2017.1	0
SO_C_20180718_O_2021.JPG	2018-07-18 14:26:01	58.60187500	-136.20995833	211	Optimal	0	0	0	1	Good	LFT	2018-09-18	SO-2017.1	0
SO_C_20180718_O_2022.JPG	2018-07-18 14:26:02	58.60185556	-136.21079167	211	Optimal	0	0	0	1	Good	LFT	2018-09-18	SO-2017.1	0
SO_C_20180718_O_2023.JPG	2018-07-18 14:26:03	58.60183889	-136.21162778	210	Optimal	0	0	0	1	Good	LFT	2018-09-18	SO-2017.1	0
SO_C_20180718_O_2024.JPG	2018-07-18 14:26:04	58.60182222	-136.21246667	210	Optimal	0	0	0	1	Good	LFT	2018-09-18	SO-2017.1	0
SO_C_20180718_O_2025.JPG	2018-07-18 14:26:05	58.60181111	-136.21330556	210	Optimal	0	0	0	1	Good	LFT	2018-09-18	SO-2017.1	0
SO_C_20180718_O_2026.JPG	2018-07-18 14:26:06	58.60180278	-136.21414444	209	Optimal	0	0	0	1	Good	LFT	2018-09-18	SO-2017.1	0
SO_C_20180718_O_2027.JPG	2018-07-18 14:26:07	58.60180278	-136.21498611	209	Optimal	0	0	0	1	Good	LFT	2018-09-18	SO-2017.1	0
SO_C_20180718_O_2028.JPG	2018-07-18 14:26:08	58.60180556	-136.21583333	209	Optimal	0	0	0	1	Good	LFT	2018-09-18	SO-2017.1	0
SO_C_20180718_O_2029.JPG	2018-07-18 14:26:09	58.60181389	-136.21667778	209	Optimal	0	0	0	1	Good	LFT	2018-09-18	SO-2017.1	0
SO_C_20180718_O_2030.JPG	2018-07-18 14:26:10	58.60181944	-136.21752222	209	Optimal	0	0	0	1	Good	LFT	2018-09-18	SO-2017.1	0
SO_C_20180718_O_2031.JPG	2018-07-18 14:26:11	58.60182778	-136.21836389	209	Optimal	0	0	0	0	Good	LFT	2018-09-18	SO-2017.1	0
SO_C_20180718_O_2032.JPG	2018-07-18 14:26:12	58.60183611	-136.21920833	209	Optimal	0	0	1	0	Good	LFT	2018-09-18	SO-2017.1	0
SO_C_20180718_O_2033.JPG	2018-07-18 14:26:13	58.60184722	-136.22004722	209	Optimal	0	0	0	0	Good	LFT	2018-09-18	SO-2017.1	0
SO_C_20180718_O_2034.JPG	2018-07-18 14:26:14	58.60185833	-136.22088611	209	Optimal	0	0	1	0	Good	LFT	2018-09-18	SO-2017.1	0
SO_C_20180718_O_2035.JPG	2018-07-18 14:26:15	58.60186944	-136.22172500	209	Optimal	0	0	0	0	Good	LFT	2018-09-18	SO-2017.1	0
SO_C_20180718_O_2036.JPG	2018-07-18 14:26:16	58.60188611	-136.22256111	210	Optimal	0	0	0	0	Good	LFT	2018-09-18	SO-2017.1	0
SO_C_20180718_O_2037.JPG	2018-07-18 14:26:17	58.60190000	-136.22339722	210	Optimal	0	0	1	1	Good	LFT	2018-09-18	SO-2017.1	0
SO_C_20180718_O_2038.JPG	2018-07-18 14:26:18	58.60191667	-136.22423611	210	Optimal	0	0	0	1	Good	LFT	2018-09-18	SO-2017.1	0
SO_C_20180718_O_2039.JPG	2018-07-18 14:26:19	58.60193056	-136.22507222	210	Optimal	0	0	0	1	Good	LFT	2018-09-18	SO-2017.1	0
SO_C_20180718_O_2040.JPG	2018-07-18 14:26:20	58.60194722	-136.22591111	211	Optimal	0	0	0	1	Good	LFT	2018-09-18	SO-2017.1	0
SO_C_20180718_O_2041.JPG	2018-07-18 14:26:21	58.60196389	-136.22675278	211	Optimal	0	0	0	1	Good	LFT	2018-09-18	SO-2017.1	0
SO_C_20180718_O_2042.JPG	2018-07-18 14:26:22	58.60198056	-136.22759167	211	Optimal	0	0	0	1	Good	LFT	2018-09-18	SO-2017.1	0
SO_C_20180718_O_2043.JPG	2018-07-18 14:27:39	58.60948333	-136.20873611	216	Optimal	0	0	0	1	Good	LFT	2018-09-18	SO-2017.1	0
SO_C_20180718_O_2044.JPG	2018-07-18 14:27:40	58.60938056	-136.20789167	217	Optimal	0	0	0	1	Good	LFT	2018-09-18	SO-2017.1	0
SO_C_20180718_O_2045.JPG	2018-07-18 14:27:41	58.60926944	-136.20704722	217	Optimal	0	0	0	1	Good	LFT	2018-09-18	SO-2017.1	0
SO_C_20180718_O_2046.JPG	2018-07-18 14:27:42	58.60915278	-136.20620000	217	Optimal	0	0	0	1	Good	LFT	2018-09-18	SO-2017.1	0
SO_C_20180718_O_2047.JPG	2018-07-18 14:27:43	58.60903611	-136.20535000	217	Optimal	0	0	0	1	Good	LFT	2018-09-18	SO-2017.1	0
SO_C_20180718_O_2048.JPG	2018-07-18 14:27:44	58.60892222	-136.20450000	216	Optimal	0	0	0	1	Good	LFT	2018-09-18	SO-2017.1	0
SO_C_20180718_O_2049.JPG	2018-07-18 14:27:45	58.60881667	-136.20365000	216	Optimal	0	0	0	1	Good	LFT	2018-09-18	SO-2017.1	0
SO_C_20180718_O_2050.JPG	2018-07-18 14:27:46	58.60871389	-136.20280000	215	Optimal	0	0	0	1	Good	LFT	2018-09-18	SO-2017.1	0
SO_C_20180718_O_2051.JPG	2018-07-18 14:27:47	58.60862222	-136.20194722	214	Optimal	0	0	0	1	Good	LFT	2018-09-18	SO-2017.1	0
SO_C_20180718_O_2052.JPG	2018-07-18 14:27:48	58.60854444	-136.20109444	214	Optimal	0	0	1	1	Good	LFT	2018-09-18	SO-2017.1	0
SO_C_20180718_O_2053.JPG	2018-07-18 14:27:49	58.60847778	-136.20024167	214	Optimal	0	0	1	0	Good	LFT	2018-09-18	SO-2017.1	0
SO_C_20180718_O_2054.JPG	2018-07-18 14:27:50	58.60842222	-136.19938889	213	Optimal	0	0	0	0	Good	LFT	2018-09-18	SO-2017.1	0
SO_C_20180718_O_2055.JPG	2018-07-18 14:27:51	58.60837778	-136.19853611	213	Optimal	0	0	0	0	Good	LFT	2018-09-18	SO-2017.1	0
SO_C_20180718_O_2056.JPG	2018-07-18 14:27:52	58.60834444	-136.19768056	214	Optimal	0	0	0	0	Good	LFT	2018-09-18	SO-2017.1	0
SO_C_20180718_O_2057.JPG	2018-07-18 14:27:53	58.60832222	-136.19682222	214	Optimal	0	0	0	0	Good	LFT	2018-09-18	SO-2017.1	0
SO_C_20180718_O_2058.JPG	2018-07-18 14:27:54	58.60830833	-136.19596111	214	Optimal	0	0	0	0	Good	LFT	2018-09-18	SO-2017.1	0
SO_C_20180718_O_2059.JPG	2018-07-18 14:27:55	58.60830556	-136.19509722	214	Optimal	0	0	0	0	Good	LFT	2018-09-18	SO-2017.1	0
SO_C_20180718_O_2060.JPG	2018-07-18 14:27:56	58.60831944	-136.19424167	215	Optimal	0	0	0	0	Good	LFT	2018-09-18	SO-2017.1	0
SO_C_20180718_O_2061.JPG	2018-07-18 14:27:57	58.60834167	-136.19338889	215	Optimal	0	0	0	0	Good	LFT	2018-09-18	SO-2017.1	0
SO_C_20180718_O_2062.JPG	2018-07-18 14:27:58	58.60837778	-136.19254167	215	Optimal	0	0	0	0	Good	LFT	2018-09-18	SO-2017.1	0
SO_C_20180718_O_2063.JPG	2018-07-18 14:27:59	58.60842500	-136.19169444	214	Optimal	0	0	0	0	Good	LFT	2018-09-18	SO-2017.1	0
[truncated: 3,966 more rows]
